# Supplementary material for: A chemoselective radical cascade polarity-mismatched silylarylation of unactivated alkenes
Source: Royal Society of Chemistry journal article supplement (doi:10.1039/d4qo01461h), 2024-01-01
Supplement: d4qo01461h1.pdf [file d4qo01461h1.pdf]

# Supporting Information

## A Chemoselective Radical Cascade Polarity- Mismatched Silylarylation of Unactivated Alkenes

Liang Liu,<sup>a, b</sup> Xiao Yang,<sup>a</sup> Jinghui Tong,<sup>a</sup> Huajie Zhu,<sup>a</sup> Lu Ouyang,<sup>a</sup> Renshi Luo,<sup>\*b</sup>  
Jianhua Liao,<sup>\*a</sup>

<sup>a</sup> School of Pharmacy, Gannan Medical University, Ganzhou, 341000, China.

<sup>b</sup> College of Chemistry and Environmental Engineering, Shaoguan University, Shaoguan,  
512005, China.

E-mail: liaojianhua715@163.com

### Table of Contents

|                                                                                 |     |
|---------------------------------------------------------------------------------|-----|
| 1. Experimental Section .....                                                   | S2  |
| 2. General Procedures for Synthesis of Indole Alkenes .....                     | S2  |
| 3. General Procedures for Synthesis of Silyated Pyrrolo[1,2-a]indoles .....     | S2  |
| 4. Analytical Data of Radical Polarity-Mismatched Silylarylation Products ..... | S3  |
| 5. Procedure for gram-scale experiment .....                                    | S18 |
| 6. Radical Trapping Experiments .....                                           | S18 |
| 7. X-ray Crystallographic Data .....                                            | S18 |
| 8. References.....                                                              | S20 |
| 9. NMR Spectra of New Compounds .....                                           | S21 |

### 1. Experimental Section

**General Information.** The starting materials of alkenyl indole (**1**) and silanes (**2**) were

purchased and used without further purification.

Melting points were measured using a melting point instrument and are uncorrected.  $^1\text{H}$  and  $^{13}\text{C}$  NMR spectra were acquired on a 400 MHz NMR spectrometer. Chemical shifts were reported in ppm from the  $\text{CDCl}_3$  resonance as the internal reference ( $\text{CDCl}_3$  7.26 ppm,  $\delta_{\text{C}} = 77.16$  ppm). Multiplicities are reported as: s = singlet, d = doublet, t = triplet, q = quartet, m = multiplet. GC-MS was conducted using electron ionization. HRMS analysis was performed on an EI-ion trap High Resolution mass spectrometer. Thin-layer chromatography (TLC) was performed using commercially prepared 100-400 Mesh silica gel plates and visualization was monitored at 254 nm. X-ray structural analysis was recorded on an X-ray analysis instrument.

## 2. General Procedures for Synthesis of Indole Alkenes **1**.<sup>[1]</sup>

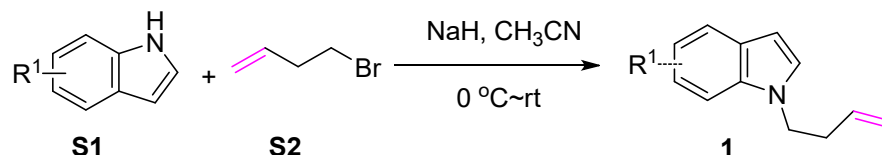

The indole **S1** (10.0 mmol, 1.0 equiv.) were added to a 150.0 mL round-bottom flask and dissolved in 30.0 mL of  $\text{CH}_3\text{CN}$ . The mixtures were then immersed in an ice bath, sodium hydride (40.0 mmol, 4.0 equiv.) was added slowly at  $0\text{ }^\circ\text{C}$ . Subsequently, 4-bromo-1-butene **S2** (40.0 mmol, 4.0 equiv.) was added slowly, stirring overnight at room temperature. After completion and quenched by  $\text{H}_2\text{O}$  at  $0\text{ }^\circ\text{C}$ , the mixture was extracted with ethyl acetate ( $3 \times 10.0$  mL). The combined ethyl acetate layer was then dried over  $\text{Na}_2\text{SO}_4$  and concentrated in vacuum. Further purification by flash column chromatography on silica gel (PE/EA = 50:1) afforded the desired indole alkenes **1**.

## 3. General Procedures for Synthesis of Silyated Pyrrolo[1,2-a]indoles.

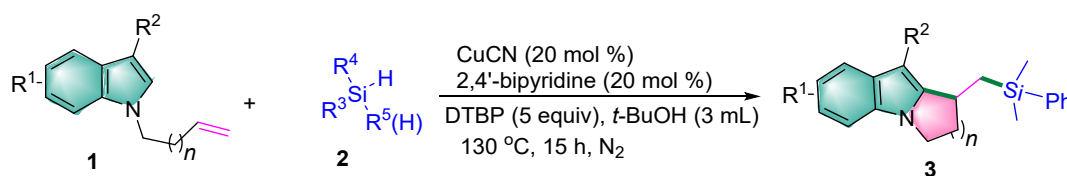

A dry 25.0 mL Schlenk tube containing a straight condensing tube capped with a balloon was charged with indole alkenes **1** (0.2 mmol, 1.0 equiv.), silanes **2** (2.0 mmol,

10.0 equiv.), CuCN (0.04 mmol, 20.0 mol%), 2,4'-bipyridine (0.04 mmol, 20.0 mol%), DTBP (1.0 mmol, 5.0 equiv.), and 3 mL of *t*-BuOH. The mixtures were vigorously stirred together at 130 °C for 15 h under nitrogen atmosphere. After completion, the reaction was quenched by saturated brine and then extracted with dichloromethane (3 × 15.0 mL). The combined dichloromethane layer was then dried over anhydrous Na<sub>2</sub>SO<sub>4</sub> and concentrated in vacuum. The residue was purified by flash column chromatography on silica gel (PE/EA = 50:1) afforded the desired silylated pyrrolo[1,2-*a*]indoles **3**.

#### 4. Analytical Data of Radical Polarity-Mismatched Silylarylation Products.

##### 1-((dimethyl(phenyl)silyl)methyl)-2,3-dihydro-1*H*-pyrrolo[1,2-*a*]indole (**3aa**)

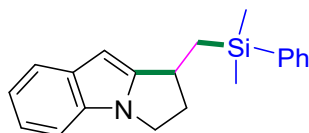

40.3 mg, 66% yield; black solid, m.p. 85-86 °C; TLC (petroleum ether/ethyl acetate = 100/1, v/v):  $R_f$  = 0.20; <sup>1</sup>H NMR (400 MHz, CDCl<sub>3</sub>) δ 7.49-7.47 (m, 2H), 7.44 (d, *J* = 7.8 Hz, 1H), 7.31-7.29 (m, 3H), 7.14-7.10 (m, 1H), 7.01 (t, *J* = 7.4 Hz, 1H), 6.95 (t, *J* = 7.4 Hz, 1H), 5.99 (s, 1H), 4.00-3.95 (m, 1H), 3.82-3.75 (m, 1H), 3.27 (ddd, *J* = 4.5 Hz, *J* = 8.2 Hz, *J* = 12.2 Hz, 1H), 2.52 (qd, *J* = 3.0 Hz, *J* = 7.4 Hz, 1H), 1.97 (dq, *J* = 8.4 Hz, *J* = 12.5 Hz, 1H), 1.46 (dd, *J* = 4.3 Hz, *J* = 14.9 Hz, 1H), 1.02 (dd, *J* = 10.2 Hz, *J* = 14.8 Hz, 1H), 0.31 (d, *J* = 5.3 Hz, 6H); <sup>13</sup>C NMR (101 MHz, CDCl<sub>3</sub>) δ 150.6, 138.9, 133.6 (2C), 132.8, 132.4, 129.1, 127.9 (2C), 120.4, 120.1, 119.0, 109.2, 91.4, 43.2, 37.5, 33.6, 21.6, -2.2, -2.3. HRMS (ESI, m/z): [M+H]<sup>+</sup> Calcd. for C<sub>20</sub>H<sub>24</sub>NSi, 306.1678; found, 306.1671.

##### 1-((dimethyl(phenyl)silyl)methyl)-8-methyl-2,3-dihydro-1*H*-pyrrolo[1,2-*a*]indole (**3ab**)

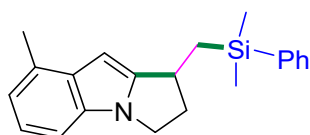

40.2 mg, 63% yield; black oil; TLC (petroleum ether/ethyl acetate = 100/1, v/v):  $R_f$  = 0.20; <sup>1</sup>H NMR (400 MHz, CDCl<sub>3</sub>) δ 7.51-7.45 (m, 2H), 7.32-7.27 (m, 3H), 6.93 (q, *J* = 8.1 Hz, 2H), 6.75 (d, *J* = 6.3 Hz, 1H), 5.97 (s, 1H), 3.98-3.92 (m, 1H), 3.76 (dd, *J* = 8.4 Hz, *J* = 8.8 Hz, 1H), 3.31-3.23 (m,

1H), 2.54-2.48 (m, 1H), 2.41 (s, 3H), 1.95 (td,  $J = 8.4$  Hz,  $J = 3.9$  Hz, 1H), 1.47 (dd,  $J = 4.2$  Hz,  $J = 14.9$  Hz, 1H), 1.05-0.99 (m, 1H), 0.31 (s, 6H);  $^{13}\text{C}$  NMR (100 MHz,  $\text{CDCl}_3$ )  $\delta$  149.9, 138.9, 133.6, 132.6, 132.0, 129.7, 129.1, 127.9, 120.3, 119.2, 106.8, 89.9, 43.2, 37.5, 33.6, 21.8, 18.7, -2.2, -2.3; HRMS (ESI,  $m/z$ ):  $[\text{M}+\text{H}]^+$  Calcd. for  $\text{C}_{21}\text{H}_{26}\text{NSi}$ , 320.1835; found, 320.1839.

**1-((dimethyl(phenyl)silyl)methyl)-8-methoxy-2,3-dihydro-1H-pyrrolo[1,2-*a*]indole (3ac)**

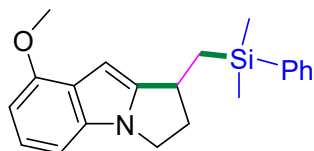

33.5 mg, 50% yield; grey solid, m.p. 111-112 °C; TLC (petroleum ether/ethyl acetate = 100/1, v/v):  $R_f = 0.20$ ;  $^1\text{H}$  NMR (400 MHz,  $\text{CDCl}_3$ )  $\delta$  7.56-7.55 (m, 2H), 7.37 (d,  $J = 4.0$  Hz, 3H), 7.02 (t,  $J = 7.9$  Hz, 1H), 6.83 (d,  $J = 8.1$  Hz, 1H), 6.48 (d,  $J = 7.7$  Hz, 1H), 6.19 (s, 1H), 4.06-4.00 (m, 1H), 3.93 (s, 3H), 3.85 (q,  $J = 8.2$  Hz, 1H), 3.33 (dt,  $J = 6.1$  Hz,  $J = 11.9$  Hz, 1H), 2.62-2.55 (m, 1H), 2.04 (dq,  $J = 8.3$  Hz,  $J = 12.4$  Hz, 1H), 1.53 (dd,  $J = 4.2$  Hz,  $J = 15.0$  Hz, 1H), 1.09 (dd,  $J = 10.2$  Hz,  $J = 14.9$  Hz, 1H), 0.38 (d,  $J = 7.0$  Hz, 6H);  $^{13}\text{C}$  NMR (100 MHz,  $\text{CDCl}_3$ )  $\delta$  152.9, 149.1, 138.9, 133.7, 133.5, 129.0, 127.9, 122.9, 120.9, 102.9, 99.3, 88.6, 55.3, 43.3, 37.6, 33.5, 21.7, -2.1, -2.3; HRMS (ESI,  $m/z$ ):  $[\text{M}+\text{H}]^+$  Calcd. for  $\text{C}_{21}\text{H}_{26}\text{NOSi}$ , 336.1784; found, 336.1791.

**1-((dimethyl(phenyl)silyl)methyl)-8-fluoro-2,3-dihydro-1H-pyrrolo[1,2-*a*]indole (3ad)**

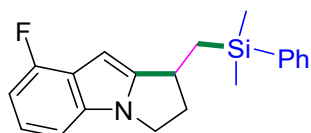

45.2 mg, 70% yield; grey solid, m.p. 82-83 °C; TLC (petroleum ether/ethyl acetate = 100/1, v/v):  $R_f = 0.20$ ;  $^1\text{H}$  NMR (400 MHz,  $\text{CDCl}_3$ )  $\delta$  7.56-7.55 (m, 2H), 7.39-7.37 (m, 3H), 6.98 (dt,  $J = 8.0$  Hz,  $J = 13.9$  Hz, 2H), 6.71 (dd,  $J = 7.5$  Hz,  $J = 10.5$  Hz, 1H), 6.15 (s, 1H), 4.04 (td,  $J = 2.9$  Hz,  $J = 9.8$  Hz, 1H), 3.87 (dd,  $J = 8.3$  Hz,  $J = 17.3$  Hz, 1H), 3.38-3.30 (m, 1H), 2.64-2.56 (m, 1H), 2.11-2.03 (m, 1H), 1.53 (dd,  $J = 4.2$  Hz,  $J = 14.8$  Hz, 1H), 1.10 (dd,  $J = 10.2$  Hz,  $J = 14.8$  Hz, 1H), 0.39 (d,  $J = 6.1$  Hz, 6H);  $^{13}\text{C}$  NMR (100 MHz,  $\text{CDCl}_3$ )  $\delta$  150.6, 138.7, 133.5 (2C), 129.1, 127.9 (2C), 120.5, 120.4, 105.4 (2C), 104.0, 103.8, 87.6, 43.4, 37.5, 33.6, 21.6, -2.2, -2.3;  $^{19}\text{F}$  NMR (376 MHz,  $\text{CDCl}_3$ )  $\delta$  -123.0 (s, 1F); HRMS (ESI,  $m/z$ ):  $[\text{M}+\text{H}]^+$  Calcd. for  $\text{C}_{20}\text{H}_{23}\text{FNSi}$ , 324.1584; found, 324.1582.

**8-chloro-1-((dimethyl(phenyl)silyl)methyl)-2,3-dihydro-1H-pyrrolo[1,2-*a*]indole (3ae)**

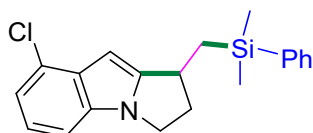

48.1 mg, 71% yield; brown oil; TLC (petroleum ether/ethyl acetate = 100/1, v/v):  $R_f = 0.20$ ;  $^1\text{H}$  NMR (400 MHz,  $\text{CDCl}_3$ )  $\delta$  7.56-7.54 (m, 2H), 7.38-7.37 (m, 3H), 7.02 (tt,  $J = 7.7$  Hz,  $J = 15.3$  Hz, 3H), 6.17 (s, 1H), 4.02 (td,  $J = 2.8$  Hz,  $J = 10.0$  Hz, 1H), 3.84 (dd,  $J = 8.4$  Hz,  $J = 17.2$  Hz, 1H), 3.34 (q,  $J = 11.4$  Hz, 1H), 2.61-2.55 (m, 1H), 2.03 (dq,  $J = 8.4$  Hz,  $J = 12.5$  Hz, 1H), 1.55 (dd,  $J = 4.1$  Hz,  $J = 4.8$  Hz, 1H), 1.09 (dd,  $J = 10.4$  Hz,  $J = 14.8$  Hz, 1H), 0.39 (d,  $J = 4.4$  Hz, 6H);  $^{13}\text{C}$  NMR (100 MHz,  $\text{CDCl}_3$ )  $\delta$  151.3, 138.7, 133.5, 133.1, 131.2, 129.2, 127.9, 125.2, 120.6, 118.7, 107.8, 90.3, 43.5, 37.3, 33.7, 21.6, -2.3(2C); HRMS (ESI, m/z):  $[\text{M}+\text{Na}]^+$  Calcd. for  $\text{C}_{20}\text{H}_{23}\text{ClNSi}$ , 340.1288; found, 340.1290.

**1-((dimethyl(phenyl)silyl)methyl)-8-(trifluoromethyl)-2,3-dihydro-1H-pyrrolo[1,2-a]indole**

**(3af)**

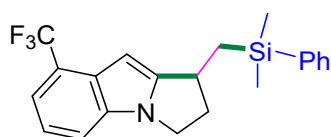

44.8mg, 60% yield; brown solid, m.p. 79-80 °C; TLC (petroleum ether/ethyl acetate = 100/1, v/v):  $R_f = 0.20$ ;  $^1\text{H}$  NMR (400 MHz,  $\text{CDCl}_3$ )  $\delta$  7.55 (dd,  $J = 2.7$  Hz,  $J = 6.0$  Hz, 2H), 7.38-7.37 (m, 3H), 7.31 (t,  $J = 6.9$  Hz, 2H), 7.10 (t,  $J = 7.8$  Hz, 1H), 6.25 (s, 1H), 4.05 (td,  $J = 2.9$  Hz,  $J = 9.9$  Hz, 1H), 3.85 (dd,  $J = 8.7$  Hz,  $J = 17.0$  Hz, 1H), 3.36 (qd,  $J = 4.4$  Hz,  $J = 8.5$  Hz, 1H), 2.63-2.56 (m, 1H), 2.09-2.00 (m, 1H), 1.56 (dd,  $J = 4.1$  Hz,  $J = 14.9$  Hz, 1H), 1.10 (dd,  $J = 10.4$  Hz,  $J = 14.8$  Hz, 1H), 0.39 (d,  $J = 3.6$  Hz, 6H);  $^{13}\text{C}$  NMR (100 MHz,  $\text{CDCl}_3$ )  $\delta$  152.7, 138.6, 133.5 (2C), 132.9, 129.2, 127.9 (2C), 121.1 (q,  $J = 31.7$  Hz), 119.2, 116.6 (q,  $J = 5.0$  Hz), 116.5 (d,  $J = 4.9$  Hz), 112.8, 90.8, 43.4, 37.2, 33.8, 21.6, -2.3, -2.4;  $^{19}\text{F}$  NMR (376 MHz,  $\text{CDCl}_3$ )  $\delta$  -61.5 (s, 3F); HRMS (ESI, m/z):  $[\text{M}+\text{H}]^+$  Calcd. for  $\text{C}_{21}\text{H}_{23}\text{F}_3\text{NSi}$ , 374.1522; found, 374.1522.

**1-((dimethyl(phenyl)silyl)methyl)-7-methyl-2,3-dihydro-1H-pyrrolo[1,2-a]indole (3ag)**

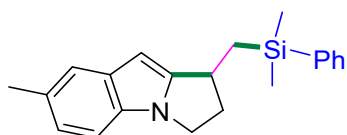

38.9 mg, 61% yield; black solid, m.p. 49-50 °C; TLC (petroleum ether/ethyl acetate = 100/1, v/v):

$R_f = 0.20$ ;  $^1\text{H NMR}$  (400 MHz,  $\text{CDCl}_3$ )  $\delta$  7.56 (dd,  $J = 2.8$  Hz,  $J = 6.1$  Hz, 2H), 7.38-7.37 (m, 3H), 7.30 (s, 1H), 7.07 (d,  $J = 8.2$  Hz, 1H), 6.91 (d,  $J = 8.1$  Hz, 1H), 5.98 (s, 1H), 4.02 (td,  $J = 3.0$  Hz,  $J = 9.7$  Hz, 1H), 3.83 (dd,  $J = 8.1$  Hz,  $J = 17.3$  Hz, 1H), 3.37-3.29 (m, 1H), 2.62-2.54 (m, 1H), 2.41 (s, 3H), 2.03 (dq,  $J = 8.3$  Hz,  $J = 12.4$  Hz, 1H), 1.52 (dd,  $J = 4.2$  Hz,  $J = 14.9$  Hz, 1H), 1.09 (dd,  $J = 10.2$  Hz,  $J = 14.8$  Hz, 1H), 0.38 (d,  $J = 5.3$  Hz, 6H);  $^{13}\text{C NMR}$  (100 MHz,  $\text{CDCl}_3$ )  $\delta$  150.7, 138.9, 133.6, 133.2, 130.8, 129.1, 128.1, 127.9, 121.6, 120.1, 108.8, 90.8, 43.2, 37.4, 33.6, 21.7, 21.5, -2.2, -2.3; HRMS (ESI, m/z):  $[\text{M}+\text{H}]^+$  Calcd. for  $\text{C}_{21}\text{H}_{26}\text{NSi}$ , 320.1835; found, 320.1835.

**1-((dimethyl(phenyl)silyl)methyl)-7-methoxy-2,3-dihydro-1H-pyrrolo[1,2-a]indole (3ah)**

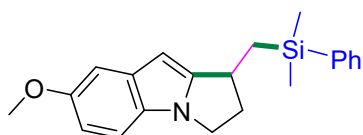

43.6 mg, 65% yield; black solid, m.p. 69-70 °C; TLC (petroleum ether/ethyl acetate = 100/1, v/v):  $R_f = 0.20$ ;  $^1\text{H NMR}$  (400 MHz,  $\text{CDCl}_3$ )  $\delta$  7.56 (s, 2H), 7.38 (s, 3H), 7.08-7.01 (m, 2H), 6.75 (d,  $J = 8.5$  Hz, 1H), 6.00 (s, 1H), 4.02 (t,  $J = 8.8$  Hz, 1H), 3.87-3.82 (m, 4H), 3.33 (d,  $J = 5.7$  Hz, 1H), 2.58 (d,  $J = 8.9$  Hz, 1H), 2.08-1.99 (m, 1H), 1.58-1.50 (m, 1H), 1.12-1.06 (m, 1H), 0.38 (d,  $J = 4.5$  Hz, 6H);  $^{13}\text{C NMR}$  (100 MHz,  $\text{CDCl}_3$ )  $\delta$  153.8, 151.4, 138.9, 133.6, 133.2, 129.1, 127.9, 127.8, 110.1, 109.8, 102.7, 91.1, 55.9, 43.3, 37.4, 33.8, 21.7, -2.2, -2.3; HRMS (ESI, m/z):  $[\text{M}+\text{Na}]^+$  Calcd. for  $\text{C}_{21}\text{H}_{26}\text{NOSi}$ , 336.1784; found, 336.1783.

**1-((dimethyl(phenyl)silyl)methyl)-7-fluoro-2,3-dihydro-1H-pyrrolo[1,2-a]indole (3ai)**

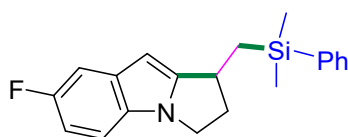

43.9mg, 68% yield; black solid, m.p. 53-54 °C; TLC (petroleum ether/ethyl acetate = 100/1, v/v):  $R_f = 0.20$ ;  $^1\text{H NMR}$  (400 MHz,  $\text{CDCl}_3$ )  $\delta$  7.55 (d,  $J = 2.8$  Hz, 2H), 7.38 (d,  $J = 1.0$  Hz, 3H), 7.16 (d,  $J = 10.0$  Hz, 1H), 7.06 (dd,  $J = 4.1$  Hz,  $J = 8.3$  Hz, 1H), 6.82 (t,  $J = 9.0$  Hz, 1H), 6.02 (s, 1H), 4.03 (t,  $J = 9.1$  Hz, 1H), 3.87-3.81 (m, 1H), 3.35-3.33 (m, 1H), 2.60-2.58 (m, 1H), 2.09-2.00 (m, 1H), 1.54-1.49 (m, 1H), 1.09 (dd,  $J = 10.5$  Hz,  $J = 14.6$  Hz, 1H), 0.38 (d,  $J = 4.3$  Hz, 6H);  $^{13}\text{C NMR}$  (100 MHz,  $\text{CDCl}_3$ )  $\delta$  150.6, 138.9, 133.6 (2C), 132.8, 132.4, 129.1, 127.9 (2C), 120.4, 120.1, 119.0, 109.2, 91.4, 43.2, 37.5, 33.6, 21.6, -2.2, -2.3;  $^{19}\text{F NMR}$  (376 MHz,  $\text{CDCl}_3$ )  $\delta$  -125.8 (s, 1F); HRMS (ESI, m/z):  $[\text{M}+\text{H}]^+$  Calcd. for  $\text{C}_{20}\text{H}_{23}\text{FNSi}$ , 324.1584; found, 324.1582.

**7-chloro-1-((dimethyl(phenyl)silyl)methyl)-2,3-dihydro-1H-pyrrolo[1,2-a]indole (3aj)**

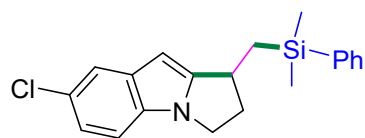

48.8 mg, 72% yield; grey solid, m.p. 60-61 °C; TLC (petroleum ether/ethyl acetate = 100/1, v/v):  $R_f$  = 0.20;  $^1\text{H}$  NMR (400 MHz,  $\text{CDCl}_3$ )  $\delta$  7.38 (dd,  $J$  = 2.9 Hz,  $J$  = 6.4 Hz, 2H), 7.39 (d,  $J$  = 1.5 Hz, 1H), 7.31-7.30 (m, 3H), 6.96 (dt,  $J$  = 5.1 Hz,  $J$  = 8.6 Hz, 2H), 5.92 (s, 1H), 3.95 (td,  $J$  = 3.0 Hz,  $J$  = 9.9 Hz, 1H), 3.80-3.74 (m, 1H), 3.30-3.22 (m, 1H), 2.56-2.48 (m, 1H), 2.02-1.93 (m, 1H), 1.44 (dd,  $J$  = 4.3 Hz,  $J$  = 14.9 Hz, 1H), 1.02 (dd,  $J$  = 10.2 Hz,  $J$  = 14.9 Hz, 1H), 0.31 (d,  $J$  = 4.8 Hz, 6H);  $^{13}\text{C}$  NMR (100 MHz,  $\text{CDCl}_3$ )  $\delta$  152.1, 138.7, 133.8, 133.5, 130.8, 129.1, 127.9, 124.6, 120.3, 119.7, 110.1, 91.3, 43.4, 37.3, 33.8, 21.6, -2.2, -2.3; HRMS (ESI, m/z):  $[\text{M}+\text{H}]^+$  Calcd. for  $\text{C}_{20}\text{H}_{23}\text{ClNSi}$ , 340.1288; found, 340.1292.

**1-((dimethyl(phenyl)silyl)methyl)-8-(trifluoromethyl)-2,3-dihydro-1H-pyrrolo[1,2-a]indole (3ak)**

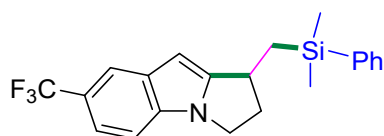

41.0mg, 55% yield; yellow oil; TLC (petroleum ether/ethyl acetate = 100/1, v/v):  $R_f$  = 0.20;  $^1\text{H}$  NMR (400 MHz,  $\text{CDCl}_3$ )  $\delta$  7.79 (s, 1H), 7.56 (dd,  $J$  = 3.0 Hz,  $J$  = 6.4 Hz, 2H), 7.38 (dd,  $J$  = 3.4 Hz,  $J$  = 6.4 Hz, 3H), 7.31 (d,  $J$  = 8.4 Hz, 1H), 7.25-7.21 (m, 1H), 6.13 (s, 1H), 4.11-4.06 (m, 1H), 3.94-3.87 (m, 1H), 3.41-3.33 (m, 1H), 2.66-2.59 (m, 1H), 2.12-2.03 (m, 1H), 1.53 (dd,  $J$  = 4.2 Hz,  $J$  = 14.9 Hz, 1H), 1.11 (dd,  $J$  = 10.1 Hz,  $J$  = 14.9 Hz, 1H), 0.39 (d,  $J$  = 5.2 Hz, 6H);  $^{13}\text{C}$  NMR (100 MHz,  $\text{CDCl}_3$ )  $\delta$  152.3, 138.6, 133.6, 132.9, 129.2, 128.0, 125.2 (q,  $J$  = 270.0 Hz), 121.1 (q,  $J$  = 31.8 Hz), 119.2, 116.5 (q,  $J$  = 5.0 Hz), 112.8, 90.8, 43.4, 37.4, 33.7, 21.6, -2.2, -2.3;  $^{19}\text{F}$  NMR (376 MHz,  $\text{CDCl}_3$ )  $\delta$  -60.1 (s, 3F); HRMS (ESI, m/z):  $[\text{M}+\text{H}]^+$  Calcd. for  $\text{C}_{21}\text{H}_{23}\text{F}_3\text{NSi}$ , 374.1552; found, 374.1548.

**1-((dimethyl(phenyl)silyl)methyl)-6-methyl-2,3-dihydro-1H-pyrrolo[1,2-a]indole (3al)**

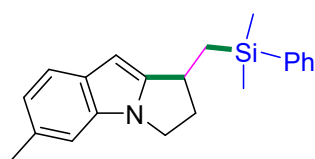

38.9mg, 61% yield; black oil; TLC (petroleum ether/ethyl acetate = 100/1, v/v):  $R_f$  = 0.20;  $^1\text{H}$  NMR

(400 MHz, CDCl<sub>3</sub>)  $\delta$  7.57-7.55 (m, 2H), 7.38 (dd,  $J = 6.5$  Hz,  $J = 7.5$  Hz, 4H), 6.99 (s, 1H), 6.86 (d,  $J = 8.1$  Hz, 1H), 6.01 (s, 1H), 4.05-3.99 (m, 1H), 3.83 (dd,  $J = 8.3$  Hz,  $J = 17.0$  Hz, 1H), 3.37-3.29 (m, 1H), 2.61-2.55 (m, 1H), 2.44 (s, 3H), 2.08-1.98 (m, 1H), 1.50 (d,  $J = 4.3$  Hz, 1H), 1.09 (dd,  $J = 10.2$  Hz,  $J = 14.8$  Hz, 1H), 0.38 (d,  $J = 5.5$  Hz, 6H); <sup>13</sup>C NMR (100 MHz, CDCl<sub>3</sub>)  $\delta$  150.0, 139.0, 133.6, 132.8, 130.6, 129.8, 129.1, 127.9, 120.6, 120.0, 109.3, 91.2, 43.0, 37.5, 33.5, 21.7, -2.2, -2.3; HRMS (ESI, m/z): [M+H]<sup>+</sup> Calcd. for C<sub>21</sub>H<sub>26</sub>NSi, 320.1835; found, 320.1833.

**1-((dimethyl(phenyl)silyl)methyl)-6-methoxy-2,3-dihydro-1H-pyrrolo[1,2-a]indole (3am)**

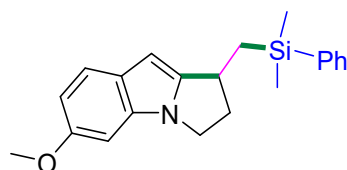

40.2mg, 60% yield; black solid, m.p. 75-76 °C; TLC (petroleum ether/ethyl acetate = 100/1, v/v): R<sub>f</sub> = 0.20; <sup>1</sup>H NMR (400 MHz, CDCl<sub>3</sub>)  $\delta$  7.56 (d,  $J = 3.1$  Hz, 2H), 7.38-7.37 (m, 4H), 6.72-6.69 (m, 2H), 5.99 (s, 1H), 4.03-3.98 (m, 1H), 3.86-3.82 (m, 4H), 3.33 (q,  $J = 3.3$  Hz, 1H), 2.62-2.55 (m, 1H), 2.08-1.99 (m, 1H), 1.51 (dd,  $J = 4.2$  Hz,  $J = 14.9$  Hz, 1H), 1.09 (dd,  $J = 10.1$  Hz,  $J = 14.8$  Hz, 1H), 0.38 (d,  $J = 5.3$  Hz, 6H); <sup>13</sup>C NMR (100 MHz, CDCl<sub>3</sub>)  $\delta$  155.2, 149.5, 138.9, 133.6, 132.9, 129.1, 127.9, 127.0, 120.9, 108.6, 93.2, 91.1, 55.8, 43.0, 37.5, 33.5, 21.7, -2.2, -2.3; HRMS (ESI, m/z): [M+H]<sup>+</sup> Calcd. for C<sub>21</sub>H<sub>26</sub>NOSi, 336.1784; found, 336.1786.

**1-((dimethyl(phenyl)silyl)methyl)-6-fluoro-2,3-dihydro-1H-pyrrolo[1,2-a]indole (3an)**

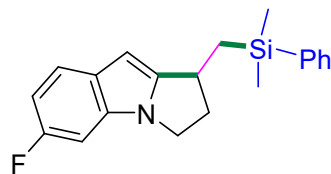

45.9 mg, 71% yield; brown oil; TLC (petroleum ether/ethyl acetate = 100/1, v/v): R<sub>f</sub> = 0.20; <sup>1</sup>H NMR (400 MHz, CDCl<sub>3</sub>)  $\delta$  7.56-7.52 (m, 2H), 7.40-7.33 (m, 4H), 6.85-6.73 (m, 2H), 6.00 (d,  $J = 10.1$  Hz, 1H), 3.99-3.90 (m, 1H), 3.82-3.73 (m, 1H), 3.32-3.28 (m, 1H), 2.60-2.50 (m, 1H), 2.07-1.95 (m, 1H), 1.52-1.45 (m, 1H), 1.12-1.03 (m, 1H), 0.38-0.34 (m, 6H); <sup>13</sup>C NMR (100 MHz, CDCl<sub>3</sub>)  $\delta$  151.0 (d,  $J = 3.6$  Hz), 138.8, 133.5 (2C), 129.1 (d,  $J = 9.0$  Hz), 127.9 (2C), 120.8, 120.7, 107.5, 107.4, 95.8, 95.5, 91.5, 43.2, 37.4, 33.6, 21.6, -2.2, -2.3; <sup>19</sup>F NMR (376 MHz, CDCl<sub>3</sub>)  $\delta$  -122.9 (s, 1F); HRMS (ESI, m/z): [M+H]<sup>+</sup> Calcd. for C<sub>20</sub>H<sub>23</sub>FNSi, 324.1584; found, 324.1588.

**6-chloro-1-((dimethyl(phenyl)silyl)methyl)-2,3-dihydro-1H-pyrrolo[1,2-a]indole (3ao)**



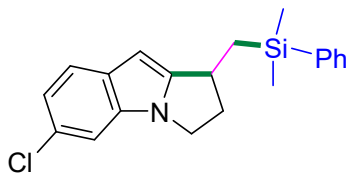

50.2 mg, 74% yield; black oil; TLC (petroleum ether/ethyl acetate = 100/1, v/v):  $R_f$  = 0.20;  $^1\text{H}$  NMR (400 MHz,  $\text{CDCl}_3$ )  $\delta$  7.54 (s, 2H), 7.39 (d,  $J$  = 8.5 Hz, 4H), 7.16 (s, 1H), 6.98 (d,  $J$  = 8.4 Hz, 1H), 6.02 (s, 1H), 3.99 (t,  $J$  = 9.1 Hz, 1H), 3.81 (dd,  $J$  = 8.4 Hz,  $J$  = 17.1 Hz, 1H), 3.32 (q,  $J$  = 11.9 Hz, 1H), 2.60-2.54 (m, 1H), 2.07-1.98 (m, 1H), 1.50 (dd,  $J$  = 4.1 Hz,  $J$  = 14.9 Hz, 1H), 1.09 (dd,  $J$  = 10.3 Hz,  $J$  = 14.7 Hz, 1H), 0.38 (d,  $J$  = 4.7 Hz, 6H);  $^{13}\text{C}$  NMR (100 MHz,  $\text{CDCl}_3$ )  $\delta$  151.4, 138.7, 133.5, 132.7, 131.3, 129.1, 127.9, 125.9, 121.1, 119.5, 109.2, 91.7, 43.2, 37.3, 33.6, 21.5, -2.2, -2.3; HRMS (ESI,  $m/z$ ):  $[\text{M}+\text{H}]^+$  Calcd. for  $\text{C}_{20}\text{H}_{23}\text{ClNSi}$ , 340.1288; found, 340.1289.

**1-((dimethyl(phenyl)silyl)methyl)-5-methyl-2,3-dihydro-1H-pyrrolo[1,2-a]indole (3ap)**

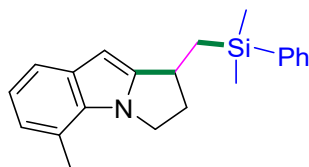

52.3 mg, 82% yield; brown solid, m.p. 67-68 °C; TLC (petroleum ether/ethyl acetate = 100/1, v/v):  $R_f$  = 0.20;  $^1\text{H}$  NMR (400 MHz,  $\text{CDCl}_3$ )  $\delta$  7.56-7.55 (m, 2H), 7.36 (dd,  $J$  = 5.1 Hz,  $J$  = 15.6 Hz, 4H), 6.90 (t,  $J$  = 7.5 Hz, 1H), 6.80 (d,  $J$  = 7.0 Hz, 1H), 6.05 (s, 1H), 4.42-4.37 (m, 1H), 4.15 (dd,  $J$  = 8.4 Hz,  $J$  = 16.9 Hz, 1H), 3.32-3.24 (m, 1H), 2.61 (s, 4H), 2.06-1.97 (m, 1H), 1.53 (dd,  $J$  = 4.0 Hz,  $J$  = 14.7 Hz, 1H), 1.08 (dd,  $J$  = 10.3 Hz,  $J$  = 14.8 Hz, 1H), 0.38 (d,  $J$  = 5.6 Hz, 6H);  $^{13}\text{C}$  NMR (100 MHz,  $\text{CDCl}_3$ )  $\delta$  150.9, 138.9, 133.6, 133.0, 132.0, 129.1, 127.9, 121.7, 120.2, 119.2, 118.2, 91.7, 46.1, 37.5, 33.0, 21.6, 18.0, -2.2, -2.3; HRMS (ESI,  $m/z$ ):  $[\text{M}+\text{H}]^+$  Calcd. for  $\text{C}_{21}\text{H}_{26}\text{NSi}$ , 320.1835; found, 320.1839.

**1-((dimethyl(phenyl)silyl)methyl)-5-methoxy-2,3-dihydro-1H-pyrrolo[1,2-a]indole (3aq)**

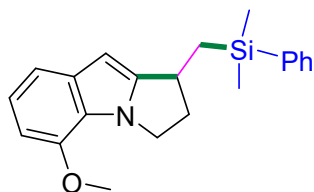

40.2 mg, 60% yield; black solid, m.p. 53-54 °C; TLC (petroleum ether/ethyl acetate = 100/1, v/v):  $R_f$  = 0.20;  $^1\text{H}$  NMR (400 MHz,  $\text{CDCl}_3$ )  $\delta$  7.56 (dd,  $J$  = 2.8 Hz,  $J$  = 6.1 Hz, 2H), 7.38-7.37 (m, 3H), 7.11 (d,  $J$  = 7.9 Hz, 1H), 6.90 (t,  $J$  = 7.8 Hz, 1H), 6.51 (d,  $J$  = 7.7 Hz, 1H), 6.02 (s, 1H), 4.41-4.46

(m, 1H), 4.13-4.06 (m, 1H), 3.88 (s, 3H), 3.32-3.25 (m, 1H), 2.58-2.51 (m, 1H), 2.06-1.97 (m, 1H), 1.54-1.49 (m, 1H), 1.08 (dd,  $J = 10.3$  Hz,  $J = 14.8$  Hz, 1H), 0.38 (d,  $J = 3.9$  Hz, 6H);  $^{13}\text{C}$  NMR (100 MHz,  $\text{CDCl}_3$ )  $\delta$  150.6, 146.8, 141.5, 135.4, 133.6, 129.1, 127.9, 122.8, 119.4, 113.4, 100.9, 91.6, 55.4, 46.2, 37.7, 33.3, 21.7, -2.1, -2.2; HRMS (ESI,  $m/z$ ):  $[\text{M}+\text{H}]^+$  Calcd. for  $\text{C}_{21}\text{H}_{26}\text{NOSi}$ , 336.1784; found, 336.1780.

**1-((dimethyl(phenyl)silyl)methyl)-5-fluoro-2,3-dihydro-1H-pyrrolo[1,2-a]indole (3ar)**

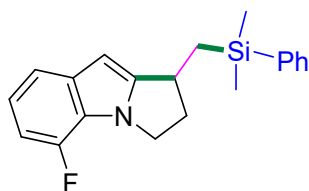

42.0 mg, 65% yield; brown solid, m.p. 59-60 °C; TLC (petroleum ether/ethyl acetate = 100/1, v/v):  $R_f = 0.20$ ;  $^1\text{H}$  NMR (400 MHz,  $\text{CDCl}_3$ )  $\delta$  7.55 (s, 2H), 7.38 (s, 4H), 6.89 (dd,  $J = 7.4$  Hz,  $J = 12.6$  Hz, 1H), 6.77-6.72 (m, 1H), 6.06 (s, 1H), 4.28 (t,  $J = 8.9$  Hz, 1H), 4.06 (dd,  $J = 8.5$  Hz,  $J = 17.4$  Hz, 1H), 3.31 (q,  $J = 11.3$  Hz, 1H), 2.61-2.55 (m, 1H), 2.10-2.00 (m, 1H), 1.51 (dd,  $J = 3.9$  Hz,  $J = 14.9$  Hz, 1H), 1.10 (dd,  $J = 10.3$  Hz,  $J = 14.7$  Hz, 1H), 0.39-0.36 (m, 6H);  $^{13}\text{C}$  NMR (100 MHz,  $\text{CDCl}_3$ )  $\delta$  151.7, 138.7, 133.5 (2C), 129.1, 127.9 (2C), 119.1, 119.0, 116.1 (2C), 105.4, 105.2, 92.2, 45.4, 37.6, 33.3, 21.6, -2.2, -2.3;  $^{19}\text{F}$  NMR (376 MHz,  $\text{CDCl}_3$ )  $\delta$  -138.5 (s, 1F); HRMS (ESI,  $m/z$ ):  $[\text{M}+\text{H}]^+$  Calcd. for  $\text{C}_{20}\text{H}_{23}\text{FNSi}$ , 324.1584; found, 324.1586.

**5-chloro-1-((dimethyl(phenyl)silyl)methyl)-2,3-dihydro-1H-pyrrolo[1,2-a]indole (3as)**

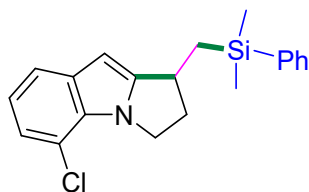

45.4 mg, 67% yield; brown solid, m.p. 57-58 °C; TLC (petroleum ether/ethyl acetate = 100/1, v/v):  $R_f = 0.20$ ;  $^1\text{H}$  NMR (400 MHz,  $\text{CDCl}_3$ )  $\delta$  7.56 (d,  $J = 3.4$  Hz, 2H), 7.37 (d,  $J = 7.7$  Hz, 4H), 7.01 (d,  $J = 7.6$  Hz, 1H), 6.90 (t,  $J = 7.7$  Hz, 1H), 6.07 (s, 1H), 4.57-4.52 (m, 1H), 4.19 (dd,  $J = 8.1$  Hz,  $J = 18.2$  Hz, 1H), 3.28 (q,  $J = 11.9$  Hz, 1H), 2.59-2.52 (m, 1H), 2.07-1.97 (m, 1H), 1.51 (dd,  $J = 4.0$  Hz,  $J = 14.9$  Hz, 1H), 1.09 (dd,  $J = 10.4$  Hz,  $J = 14.7$  Hz, 1H), 0.39 (d,  $J = 3.9$  Hz, 6H);  $^{13}\text{C}$  NMR (100 MHz,  $\text{CDCl}_3$ )  $\delta$  152.1, 138.7, 134.9, 133.5, 129.1, 127.9, 120.5, 119.7, 119.0, 116.1, 92.3, 46.1, 37.3, 33.1, 21.5, -2.2, -2.3; HRMS (ESI,  $m/z$ ):  $[\text{M}+\text{H}]^+$  Calcd. for  $\text{C}_{20}\text{H}_{23}\text{ClNSi}$ , 340.1288; found, 340.1281.

**1-((dimethyl(phenyl)silyl)methyl)-6,7-difluoro-2,3-dihydro-1H-pyrrolo[1,2-a]indole (3at)**

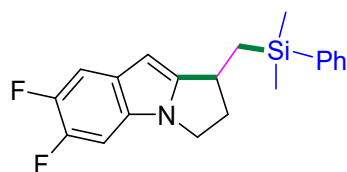

38.0 mg, 56% yield; yellow solid, m.p. 50-51 °C; TLC (petroleum ether/ethyl acetate = 100/1, v/v):  $R_f = 0.20$ ;  $^1\text{H NMR}$  (400 MHz,  $\text{CDCl}_3$ )  $\delta$  7.55 (dd,  $J = 2.9$  Hz,  $J = 6.3$  Hz, 2H), 7.37 (dd,  $J = 3.2$  Hz,  $J = 6.4$  Hz, 3H), 7.22 (dd,  $J = 4.7$  Hz, 1H), 6.93 (dd,  $J = 10.5$  Hz,  $J = 6.8$  Hz, 1H), 5.98 (s, 1H), 4.01-3.96 (m, 1H), 3.82 (dd,  $J = 8.1$  Hz,  $J = 17.4$  Hz, 1H), 3.37-3.29 (m, 1H), 2.63-2.56 (m, 1H), 2.10-2.01 (m, 1H), 1.55-1.51 (m, 1H), 1.09 (dd,  $J = 10.1$  Hz,  $J = 14.9$  Hz, 1H), 0.38 (d,  $J = 4.6$  Hz, 6H);  $^{13}\text{C NMR}$  (100 MHz,  $\text{CDCl}_3$ )  $\delta$  152.1 (d,  $J = 3.6$  Hz), 138.7, 133.5 (2C), 129.2, 127.9 (2C), 127.7 (d,  $J = 8.4$  Hz), 127.5 (d,  $J = 10.2$  Hz), 106.9, 106.7, 97.2, 97.0, 91.7, 43.5, 37.4, 33.9, 21.6, -2.2, -2.3;  $^{19}\text{F NMR}$  (376 MHz,  $\text{CDCl}_3$ )  $\delta$  -146.1 (d,  $J = 21.0$  Hz, 2F),  $\delta$  -149.1 (d,  $J = 21.0$  Hz, 1F); HRMS (ESI, m/z):  $[\text{M}+\text{H}]^+$  Calcd. for  $\text{C}_{20}\text{H}_{22}\text{F}_2\text{NSi}$ , 342.1490; found, 342.1492.

**8-(benzyloxy)-1-((dimethyl(phenyl)silyl)methyl)-2,3-dihydro-1H-pyrrolo[1,2-a]indole (3au)**

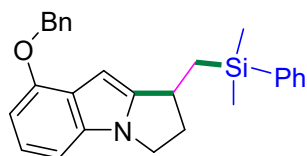

50.1 mg, 61% yield; grey solid, m.p. 94-95 °C; TLC (petroleum ether/ethyl acetate = 100/1, v/v):  $R_f = 0.20$ ;  $^1\text{H NMR}$  (400 MHz,  $\text{CDCl}_3$ )  $\delta$  7.57-7.55 (m, 2H), 7.50 (d,  $J = 7.5$  Hz, 2H), 7.40 (s, 1H), 7.38-7.37 (m, 4H), 7.32 (d,  $J = 7.2$  Hz, 1H), 6.99 (t,  $J = 7.9$  Hz, 1H), 6.84 (d,  $J = 8.0$  Hz, 1H), 6.54 (d,  $J = 7.8$  Hz, 1H), 6.24 (s, 1H), 5.21 (s, 2H), 4.07-4.02 (m, 1H), 3.89-3.83 (m, 1H), 3.34 (q,  $J = 11.7$  Hz, 1H), 2.61-2.57 (m, 1H), 2.09-2.00 (m, 1H), 1.57-1.53 (m, 1H), 1.10 (dd,  $J = 10.3$  Hz,  $J = 14.8$  Hz, 1H), 0.38 (d,  $J = 2.9$  Hz, 6H);  $^{13}\text{C NMR}$  (100 MHz,  $\text{CDCl}_3$ )  $\delta$  152.2, 149.4, 139.1, 138.1, 134.0, 133.7, 129.2, 128.6, 128.1, 127.7, 127.4, 123.5, 121.0, 103.3, 101.1, 89.1, 70.0, 43.5, 37.7, 33.7, 21.9, -2.1; HRMS (ESI, m/z):  $[\text{M}+\text{Na}]^+$  Calcd. for  $\text{C}_{27}\text{H}_{29}\text{NNaOSi}$ , 434.1911; found, 434.1911.

**1-((dimethyl(phenyl)silyl)methyl)-9-methyl-2,3-dihydro-1H-pyrrolo[1,2-a]indole (3av)**

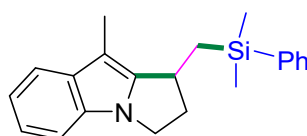

45.9 mg, 72% yield; brown oil; TLC (petroleum ether/ethyl acetate = 100/1, v/v):  $R_f$  = 0.20;  $^1\text{H}$  NMR (400 MHz,  $\text{CDCl}_3$ )  $\delta$  7.55 (s, 2H), 7.46 (d,  $J$  = 7.7 Hz, 1H), 7.38 (d,  $J$  = 1.7 Hz, 3H), 7.14 (d,  $J$  = 7.8 Hz, 1H), 7.10-7.02 (m, 2H), 4.02-3.96 (m, 1H), 3.83 (dd,  $J$  = 7.9 Hz,  $J$  = 16.0 Hz, 1H), 3.42-3.36 (m, 1H), 2.62-2.54 (m, 1H), 2.27 (s, 3H), 2.08-1.99 (m, 1H), 1.57-1.54 (m, 1H), 1.11 (dd,  $J$  = 12.0 Hz,  $J$  = 14.6 Hz, 1H), 0.38 (s, 6H);  $^{13}\text{C}$  NMR (100 MHz,  $\text{CDCl}_3$ )  $\delta$  146.0, 139.0, 133.6, 133.3, 131.9, 129.1, 127.9, 120.0, 118.3, 109.0, 100.0, 42.6, 36.6, 32.8, 21.2, 8.5, -2.2, -2.3; HRMS (ESI,  $m/z$ ):  $[\text{M}+\text{H}]^+$  Calcd. for  $\text{C}_{21}\text{H}_{26}\text{NSi}$ , 320.1835; found, 320.1836.

**9-((dimethyl(phenyl)silyl)methyl)-6,7,8,9-tetrahydropyrido[1,2-*a*]indole (3aw)**

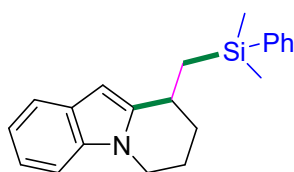

38.9 mg, 61% yield; black oil; TLC (petroleum ether/ethyl acetate = 100/1, v/v):  $R_f$  = 0.20;  $^1\text{H}$  NMR (400 MHz,  $\text{CDCl}_3$ )  $\delta$  7.56-7.51 (m, 3H), 7.37 (s, 3H), 7.22 (d,  $J$  = 7.9 Hz, 1H), 7.09 (dt,  $J$  = 6.8 Hz,  $J$  = 21.6 Hz, 2H), 6.27 (s, 1H), 4.14-4.12 (m, 1H), 3.82-3.76 (m, 1H), 3.08 (s, 1H), 2.10 (d,  $J$  = 7.9 Hz, 1H), 1.93 (dd,  $J$  = 9.6 Hz,  $J$  = 28.0 Hz, 2H), 1.62-1.54 (m, 2H), 1.22-1.15 (m, 1H), 0.37 (s, 6H);  $^{13}\text{C}$  NMR (100 MHz,  $\text{CDCl}_3$ )  $\delta$  144.2, 139.4, 136.3, 133.5, 129.0, 128.1, 127.8, 120.3, 119.7, 119.5, 108.7, 96.9, 42.1, 31.7, 29.9, 22.6, 22.3, -1.8, -1.9; HRMS (ESI,  $m/z$ ):  $[\text{M}+\text{H}]^+$  Calcd. for  $\text{C}_{21}\text{H}_{26}\text{NSi}$ , 320.1835; found, 320.1834.

**9-((dimethyl(phenyl)silyl)methyl)-2-methyl-6,7,8,9-tetrahydropyrido[1,2-*a*]indole (3ax)**

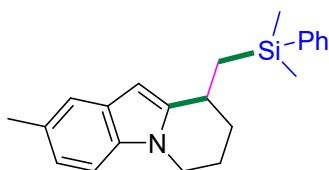

38.6 mg, 58% yield; brown oil; TLC (petroleum ether/ethyl acetate = 100/1, v/v):  $R_f$  = 0.20;  $^1\text{H}$  NMR (400 MHz,  $\text{CDCl}_3$ )  $\delta$  7.47-7.45 (m, 2H), 7.27-7.26 (m, 3H), 7.22 (s, 1H), 7.00 (d,  $J$  = 8.2 Hz, 1H), 6.85 (d,  $J$  = 8.2 Hz, 1H), 6.09 (s, 1H), 4.00-3.95 (m, 1H), 3.67-3.61 (m, 1H), 2.00-2.93 (m, 1H), 2.33 (s, 3H), 2.02-1.95 (m, 1H), 1.89-1.75 (m, 2H), 1.51-1.47 (m, 1H), 1.31-1.22 (m, 1H), 1.11-1.05 (m, 1H), 0.27 (d,  $J$  = 3.1 Hz, 6H);  $^{13}\text{C}$  NMR (100 MHz,  $\text{CDCl}_3$ )  $\delta$  146.0, 141.3, 136.6, 135.4, 130.8, 130.5, 130.3, 129.7, 123.7, 121.3, 110.2, 98.3, 44.0, 33.6, 31.8, 24.5, 24.2, 23.4, 0.1, 0.0; HRMS (ESI,  $m/z$ ):  $[\text{M}+\text{H}]^+$  Calcd. for  $\text{C}_{22}\text{H}_{28}\text{NSi}$ , 334.1991; found, 334.1993.

**2-chloro-9-((dimethyl(phenyl)silyl)methyl)-6,7,8,9-tetrahydropyrido[1,2-*a*]indole (3ay)**

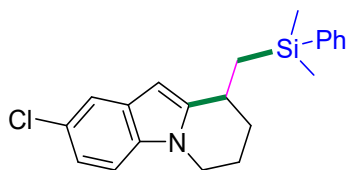

49.4 mg, 70% yield; brown oil; TLC (petroleum ether/ethyl acetate = 100/1, v/v):  $R_f$  = 0.20;  $^1\text{H}$  NMR (400 MHz,  $\text{CDCl}_3$ )  $\delta$  7.55-7.52 (m, 2H), 7.46-7.45 (d,  $J$  = 1.9 Hz, 1H), 7.36-7.34 (m, 3H), 7.09-7.02 (m, 2H), 6.18 (s, 1H), 4.07-4.02 (m, 1H), 3.76-3.69 (m, 1H), 3.07-3.00 (m, 1H), 2.10-2.05 (m, 1H), 1.98-1.83 (m, 2H), 1.57-1.53 (m, 1H), 1.40-1.31 (m, 1H), 1.19-1.13 (m, 1H), 0.4 (d,  $J$  = 2.4 Hz, 6H);  $^{13}\text{C}$  NMR (100 MHz,  $\text{CDCl}_3$ )  $\delta$  147.5, 141.1, 136.6, 135.4, 131.0, 131.0, 129.8, 127.0, 122.3, 121.0, 111.5, 98.7, 44.2, 33.6, 31.5, 24.4, 24.2, 0.1, 0.0; HRMS (ESI, m/z):  $[\text{M}+\text{H}]^+$  Calcd. for  $\text{C}_{21}\text{H}_{25}\text{ClNSi}$ , 354.1445; found, 354.1443.

***N*-(2-(1-((dimethyl(phenyl)silyl)methyl)-7-methoxy-2,3-dihydro-1*H*-pyrrolo[1,2-*a*]indol-9-yl)ethyl)acetamide (3az)**

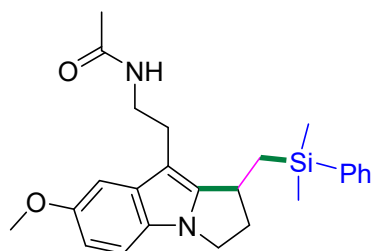

42.0 mg, 50% yield; yellow oil; TLC (petroleum ether/ethyl acetate = 3/1, v/v):  $R_f$  = 0.50;  $^1\text{H}$  NMR (400 MHz,  $\text{CDCl}_3$ )  $\delta$  7.57-7.52 (m, 2H), 7.36 (q,  $J$  = 2.7 Hz, 3H), 7.03 (d,  $J$  = 8.7 Hz, 1H), 6.96 (d,  $J$  = 2.4 Hz, 1H), 6.74 (dd,  $J$  = 8.7, 2.4 Hz, 1H), 5.75 (s, 1H), 3.96-3.91 (m, 1H), 3.80 (s, 3H), 3.78-3.73 (m, 1H), 3.51-3.42 (m, 2H), 3.36-3.29 (m, 1H), 2.88 (t,  $J$  = 6.7 Hz, 2H), 2.58-2.50 (m, 1H), 2.04-1.96 (m, 1H), 1.83 (s, 3H), 1.52 (dd,  $J$  = 14.8, 2.6 Hz, 1H), 1.08 (dd,  $J$  = 14.7, 11.9 Hz, 1H), 0.38 (d,  $J$  = 2.1 Hz, 6H);  $^{13}\text{C}$  NMR (100 MHz,  $\text{CDCl}_3$ )  $\delta$  172.2, 156.0, 150.3, 140.9, 135.9, 135.3, 131.5, 130.3, 129.7, 112.5, 112.4, 103.6, 102.9, 58.3, 45.2, 42.5, 38.7, 35.6, 26.6, 25.6, 24.1, 0.0. HRMS (ESI, m/z):  $[\text{M}+\text{H}]^+$  Calcd. for  $\text{C}_{25}\text{H}_{33}\text{N}_2\text{O}_2\text{Si}$ , 421.2306; found, 421.2342.

**1-(((3,5-bis(trifluoromethyl)phenyl)dimethylsilyl)methyl)-2,3-dihydro-1*H*-pyrrolo[1,2-*a*]indole (3ba)**

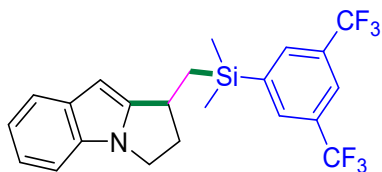

52.0 mg, 59% yield; black oil; TLC (petroleum ether/ethyl acetate = 100/1, v/v):  $R_f$  = 0.20;  $^1\text{H NMR}$  (400 MHz,  $\text{CDCl}_3$ )  $\delta$  7.94 (s, 2H), 7.87 (s, 1H), 7.52 (d,  $J$  = 7.8 Hz, 1H), 7.25-7.19 (m, 1H), 7.07 (dt,  $J$  = 7.1 Hz,  $J$  = 26.1 Hz, 2H), 6.08 (s, 1H), 4.13-4.08 (m, 1H), 3.92 (dd,  $J$  = 7.7 Hz,  $J$  = 17.5 Hz, 1H), 3.42-3.34 (m, 1H), 2.69-2.61 (m, 1H), 2.13-2.04 (m, 1H), 1.57 (dd,  $J$  = 4.6 Hz,  $J$  = 15.0 Hz, 1H), 1.22-1.19 (m, 1H), 0.47 (d,  $J$  = 3.6 Hz, 6H);  $^{13}\text{C NMR}$  (100 MHz,  $\text{CDCl}_3$ )  $\delta$  149.6, 142.7, 133.2 (2C), 132.6 (q,  $J$  = 32.4 Hz), 130.9 (q,  $J$  = 32.8 Hz), 124.9, 123.0 (dt,  $J$  = 4.0 Hz,  $J$  = 7.7 Hz), 122.2, 120.5, 120.4, 119.2, 109.3, 91.7, 43.1, 37.6, 33.4, 21.3, -2.4 (2C);  $^{19}\text{F NMR}$  (376 MHz,  $\text{CDCl}_3$ )  $\delta$  -62.8 (s, 1F); HRMS (ESI,  $m/z$ ):  $[\text{M}+\text{H}]^+$  Calcd. for  $\text{C}_{22}\text{H}_{22}\text{F}_6\text{NSi}$ , 442.1426; found, 442.1428.

#### 1-((methylbis(phenyl)silyl)methyl)-2,3-dihydro-1H-pyrrolo[1,2-a]indole (3bb)

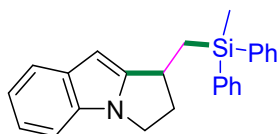

47.7 mg, 65% yield; black oil; TLC (petroleum ether/ethyl acetate = 100/1, v/v):  $R_f$  = 0.20;  $^1\text{H NMR}$  (400 MHz,  $\text{CDCl}_3$ )  $\delta$  7.57 (d,  $J$  = 6.7 Hz, 4H), 7.51 (d,  $J$  = 7.6 Hz, 2H), 7.37 (d,  $J$  = 5.9 Hz, 5H), 7.17 (d,  $J$  = 7.8 Hz, 1H), 7.10-7.01 (m, 2H), 6.06 (s, 1H), 4.04-3.99 (m, 1H), 3.85-3.78 (m, 1H), 3.42 (dd,  $J$  = 11.5 Hz,  $J$  = 17.9 Hz, 1H), 2.53-2.45 (m, 1H), 2.07-1.98 (m, 1H), 1.88 (dd,  $J$  = 2.9 Hz,  $J$  = 15.0 Hz, 1H), 1.42 (dd,  $J$  = 10.4 Hz,  $J$  = 14.9 Hz, 1H), 0.68 (d,  $J$  = 0.9 Hz, 3H);  $^{13}\text{C NMR}$  (100 MHz,  $\text{CDCl}_3$ )  $\delta$  150.4, 136.9, 136.7, 134.5, 134.4, 132.8, 132.4, 129.4, 128.0, 128.0, 120.4, 120.2, 119.0, 109.2, 91.5, 43.1, 37.4, 33.5, 20.0, -3.6; HRMS (ESI,  $m/z$ ):  $[\text{M}+\text{H}]^+$  Calcd. for  $\text{C}_{25}\text{H}_{26}\text{NSi}$ , 368.1835; found, 368.1839.

#### 1-((triphenylsilyl)methyl)-2,3-dihydro-1H-pyrrolo[1,2-a]indole (3bc)

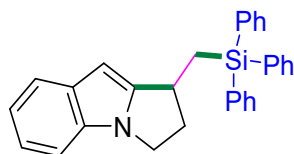

62.6 mg, 73% yield; black solid, m.p. 61-62 °C; TLC (petroleum ether/ethyl acetate = 100/1, v/v):  $R_f$  = 0.20;  $^1\text{H NMR}$  (400 MHz,  $\text{CDCl}_3$ )  $\delta$  7.60 (d,  $J$  = 6.9 Hz, 6H), 7.49 (d,  $J$  = 7.7 Hz, 1H), 7.50-7.36 (m, 9H), 7.15 (d,  $J$  = 7.9 Hz, 1H), 7.09-7.00 (m, 2H), 5.98 (s, 1H), 4.01-3.95 (m, 1H), 3.77 (dd,

$J = 8.2$  Hz,  $J = 17.0$  Hz, 1H), 3.55-3.51 (m, 1H), 2.37-2.32 (m, 1H), 2.17 (dd,  $J = 3.7$  Hz,  $J = 15.1$  Hz, 1H), 2.03-1.94 (m, 1H), 1.70 (dd,  $J = 10.1$  Hz,  $J = 15.0$  Hz, 1H);  $^{13}\text{C}$  NMR (100 MHz,  $\text{CDCl}_3$ )  $\delta$  150.3, 135.7, 134.7, 132.8, 132.4, 129.7, 128.0, 120.4, 120.2, 119.0, 109.2, 91.6, 43.1, 37.6, 33.4, 19.1; HRMS (ESI,  $m/z$ ):  $[\text{M}+\text{H}]^+$  Calcd. for  $\text{C}_{30}\text{H}_{28}\text{NSi}$ , 430.1991; found, 430.1994.

**1-((diphenylsilyl)methyl)-2,3-dihydro-1H-pyrrolo[1,2-a]indole (3bd)**

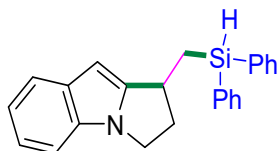

42.4 mg, 60% yield; brown oil; TLC (petroleum ether/ethyl acetate = 100/1, v/v):  $R_f = 0.20$ ;  $^1\text{H}$  NMR (400 MHz,  $\text{CDCl}_3$ )  $\delta$  7.61 (d,  $J = 6.8$  Hz, 4H), 7.53 (d,  $J = 7.8$  Hz, 1H), 7.43-7.35 (m, 6H), 7.22-7.18 (m, 1H), 7.12-7.02 (m, 2H), 6.17 (s, 1H), 5.07 (t,  $J = 3.8$  Hz, 1H), 4.10-4.05 (m, 1H), 3.87 (dd,  $J = 7.8$  Hz,  $J = 17.4$  Hz, 1H), 3.49-3.41 (m, 1H), 2.71-2.63 (m, 1H), 2.23-2.14 (m, 1H), 1.87-1.81 (m, 1H), 1.56-1.47 (m, 1H);  $^{13}\text{C}$  NMR (100 MHz,  $\text{CDCl}_3$ )  $\delta$  149.6, 135.1, 135.1, 133.8, 133.7, 132.8, 132.4, 129.8, 128.1, 128.1, 120.4, 120.2, 119.0, 91.9, 43.0, 37.4, 33.7, 18.3; HRMS (ESI,  $m/z$ ):  $[\text{M}+\text{Na}]^+$  Calcd. for  $\text{C}_{24}\text{H}_{24}\text{NSi}$ , 354.1678; found, 354.1677.

**1-(((4-(dimethylsilyl)phenyl)dimethylsilyl)methyl)-2,3-dihydro-1H-pyrrolo[1,2-a]indole (3be)**

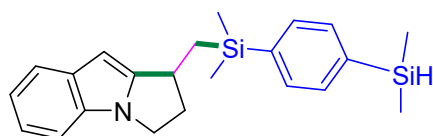

32.7 mg, 45% yield; black solid, m.p. 57-58 °C; TLC (petroleum ether/ethyl acetate = 100/1, v/v):  $R_f = 0.20$ ;  $^1\text{H}$  NMR (400 MHz,  $\text{CDCl}_3$ )  $\delta$  7.55-7.51 (m, 5H), 7.23-7.18 (m, 1H), 7.11-7.01 (m, 2H), 6.06 (s, 1H), 4.45-4.41 (m, 1H), 4.09-4.04 (m, 1H), 3.91-3.84 (m, 1H), 3.39-3.32 (m, 1H), 2.66-2.59 (m, 1H), 2.11-2.02 (m, 1H), 1.54 (dd,  $J = 4.3$  Hz,  $J = 14.9$  Hz, 1H), 1.11 (dd,  $J = 10.1$  Hz,  $J = 14.9$  Hz, 1H), 0.37 (dd,  $J = 3.7$  Hz,  $J = 13.5$  Hz, 12H);  $^{13}\text{C}$  NMR (100 MHz,  $\text{CDCl}_3$ )  $\delta$  150.6, 139.9, 138.4, 133.4, 132.9, 132.8, 132.4, 120.4, 120.1, 119.0, 109.2, 91.4, 43.2, 37.5, 33.6, 21.6, -2.3, -3.9; HRMS (ESI,  $m/z$ ):  $[\text{M}+\text{H}]^+$  Calcd. for  $\text{C}_{22}\text{H}_{30}\text{NSi}$ , 364.1917; found, 364.1914.

**7-chloro-1-((methylphenylsilyl)methyl)-2,3-dihydro-1H-pyrrolo[1,2-a]indole (3bf)**

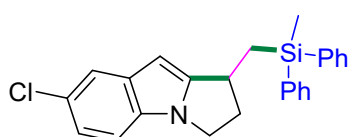

60.2mg, 75% yield; brown solid, m.p. 63-64 °C; TLC (petroleum ether/ethyl acetate = 100/1, v/v):

$R_f = 0.20$ ;  $^1\text{H NMR}$  (400 MHz,  $\text{CDCl}_3$ )  $\delta$  7.49 (d,  $J = 6.1$  Hz, 4H), 7.38 (s, 1H), 7.31 (t,  $J = 6.5$  Hz, 6H), 6.99-6.93 (m, 2H), 5.89 (s, 1H), 3.94-3.89 (m, 1H), 3.73 (dd,  $J = 8.3$  Hz,  $J = 17.2$  Hz, 1H), 3.34 (dd,  $J = 11.5$  Hz,  $J = 17.3$  Hz, 1H), 2.46-2.38 (m, 1H), 2.01-1.91 (m, 1H), 1.77 (dd,  $J = 4.1$  Hz,  $J = 15.0$  Hz, 1H), 1.33 (dd,  $J = 10.2$  Hz,  $J = 14.9$  Hz, 1H), 0.60 (s, 3H);  $^{13}\text{C NMR}$  (100 MHz,  $\text{CDCl}_3$ )  $\delta$  151.9, 136.8, 136.5, 134.5, 134.4, 133.8, 130.8, 129.4, 129.4, 128.0, 128.0, 124.7, 120.4, 119.7, 110.1, 91.5, 43.4, 37.3, 33.7, 20.0, -3.6; HRMS (ESI,  $m/z$ ):  $[\text{M}+\text{H}]^+$  Calcd. for  $\text{C}_{25}\text{H}_{25}\text{ClNSi}$ , 402.1445; found, 402.1445.

**7-chloro-1-((triphenylsilyl)methyl)-2,3-dihydro-1H-pyrrolo[1,2-a]indole (3bg)**

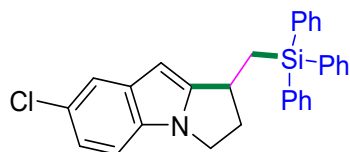

66.7 mg, 72% yield; brown solid, m.p. 109-110 °C; TLC (petroleum ether/ethyl acetate = 100/1, v/v):  $R_f = 0.20$ ;  $^1\text{H NMR}$  (400 MHz,  $\text{CDCl}_3$ )  $\delta$  7.52 (d,  $J = 6.6$  Hz, 6H), 7.35-7.29 (m, 10H), 6.95 (dd,  $J = 8.2$  Hz,  $J = 14.8$  Hz, 2H), 5.80 (s, 1H), 3.88 (dd,  $J = 6.2$  Hz,  $J = 12.0$  Hz, 1H), 3.68 (dd,  $J = 7.9$  Hz,  $J = 16.1$  Hz, 1H), 3.46 (d,  $J = 5.4$  Hz, 1H), 2.32-2.25 (m, 1H), 2.06 (d,  $J = 10.1$  Hz, 1H), 1.97-1.88 (m, 1H), 1.66-1.60 (m, 1H);  $^{13}\text{C NMR}$  (100 MHz,  $\text{CDCl}_3$ )  $\delta$  151.8, 135.7, 134.6, 133.7, 130.8, 129.7, 128.0, 124.6, 120.4, 119.7, 110.1, 91.6, 43.3, 37.6, 33.6, 19.0; HRMS (ESI,  $m/z$ ):  $[\text{M}+\text{Na}]^+$  Calcd. for  $\text{C}_{30}\text{H}_{27}\text{ClNSi}$ , 464.1601; found, 464.1602.

**7-chloro-1-((diphenylsilyl)methyl)-2,3-dihydro-1H-pyrrolo[1,2-a]indole (3bh)**

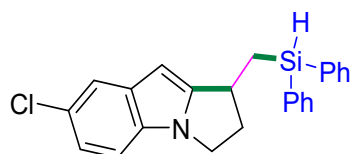

50.3 mg, 65% yield; black oil; TLC (petroleum ether/ethyl acetate = 100/1, v/v):  $R_f = 0.20$ ;  $^1\text{H NMR}$  (400 MHz,  $\text{CDCl}_3$ )  $\delta$  7.59 (d,  $J = 7.1$  Hz, 4H), 7.47 (s, 1H), 7.39 (t,  $J = 7.0$  Hz, 6H), 7.08-7.02 (m, 2H), 6.09 (s, 1H), 5.05 (t,  $J = 3.7$  Hz, 1H), 4.06-4.00 (m, 1H), 3.84 (dd,  $J = 7.9$  Hz,  $J = 17.4$  Hz, 1H), 3.48-3.40 (m, 1H), 2.71-2.63 (m, 1H), 2.23-2.14 (m, 1H), 1.84-1.78 (m, 1H), 1.53-1.46 (m, 1H);  $^{13}\text{C NMR}$  (100 MHz,  $\text{CDCl}_3$ )  $\delta$  151.1, 135.1, 133.8, 133.7, 133.6, 130.8, 129.9, 129.8, 128.2, 128.1, 124.7, 120.4, 119.8, 110.1, 91.9, 43.3, 37.3, 33.9, 18.2; HRMS (ESI,  $m/z$ ):  $[\text{M}+\text{H}]^+$  Calcd. for  $\text{C}_{24}\text{H}_{23}\text{ClNSi}$ , 388.1288; found, 388.1289.

**3,5-di-tert-butyl-4-((triphenylsilyl)methyl)cyclohexa-2,5-dien-1-one (5)**



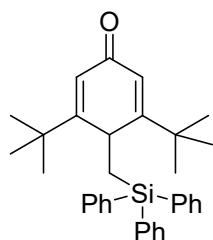

45.9 mg, 48% yield; yellow oil; TLC (petroleum ether/ethyl acetate = 100/1, v/v):  $R_f$  = 0.20;  $^1\text{H}$  NMR (400 MHz,  $\text{CDCl}_3$ )  $\delta$  7.39 (s, 3H), 7.37 (s, 6H), 7.33-7.29 (m, 6H), 6.59 (s, 2H), 2.81 (s, 1H), 1.43 (s, 2H), 1.22 (s, 18H);  $^{13}\text{C}$  NMR (100 MHz,  $\text{CDCl}_3$ )  $\delta$  186.0, 150.9, 136.0, 129.4, 127.6, 125.8, 124.9, 34.1, 30.4, 30.1, 22.8; HRMS (ESI, m/z):  $[\text{M}+\text{H}]^+$  Calcd. for  $\text{C}_{33}\text{H}_{39}\text{OSi}$ , 479.2770; found, 479.2775.

***N*-(2-(1-(but-3-en-1-yl)-5-methoxy-1*H*-indol-3-yl)ethyl)acetamide(1z)**

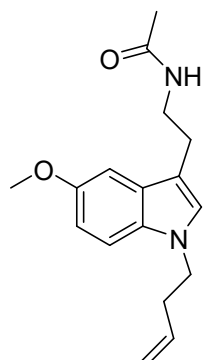

943.9 mg, 33% yield; white solid, m.p. 63–65 °C; TLC (petroleum ether/ethyl acetate = 5/1, v/v):  $R_f$  = 0.60;  $^1\text{H}$  NMR (400 MHz,  $\text{CDCl}_3$ )  $\delta$  7.22 (d,  $J$  = 8.9 Hz, 1H), 7.02 (d,  $J$  = 2.4 Hz, 1H), 6.92–6.86 (m, 2H), 5.76 (m, 1H), 5.61 (s, 1H), 5.09–5.01 (m, 2H), 4.10 (t,  $J$  = 7.2 Hz, 2H), 3.86 (s, 3H), 3.56 (q,  $J$  = 6.5 Hz, 2H), 2.94–2.89 (m, 2H), 2.54 (q,  $J$  = 6.9 Hz, 2H), 1.92 (s, 3H);  $^{13}\text{C}$  NMR (100 MHz,  $\text{CDCl}_3$ )  $\delta$  170.0, 153.8, 134.8, 131.7, 128.2, 126.3, 117.4, 112.0, 111.0, 110.3, 100.6, 56.0, 46.0, 39.8, 34.6, 25.2, 23.4. HRMS (ESI, m/z):  $[\text{M}+\text{H}]^+$  Calcd. for  $\text{C}_{17}\text{H}_{23}\text{N}_2\text{O}_2$ , 287.1754; found 287.1749.

**5. Procedure for gram-scale experiment**

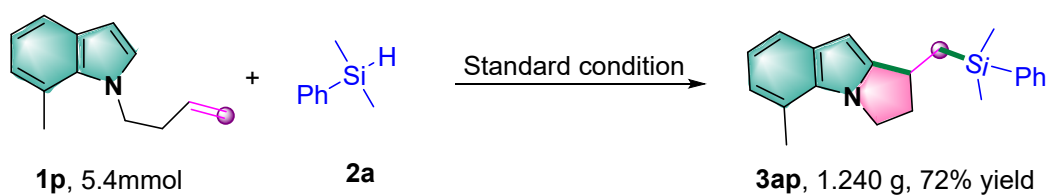

A dry 100 mL flask containing a straight condensing tube capped with a balloon was charged with 1-(but-3-en-1-yl)-7-methyl-1H-indole **1p** (5.4 mmol, 1.00 g), dimethylphenylsilane **2a** (54 mmol, 10.0 equiv.), CuCN (1.08 mmol, 20.0 mol%), 2,4'-bipyridine (1.08 mmol, 20.0 mol%), DTBP (5.0 equiv.) in *t*-BuOH (15.0 mL) successively. The mixture was stirred at 130 °C for 15 h in a nitrogen atmosphere. After completion, the reaction was quenched by saturated brine and then extracted with dichloromethane (3 × 25.0 mL). The combined dichloromethane layer was then dried over anhydrous Na<sub>2</sub>SO<sub>4</sub> and concentrated in vacuum. The residue was purified by flash column chromatography on silica gel (PE/EA = 50:1) afforded the desired silylated pyrrolo[1,2-a]indoles **3ap**.

## 6. Radical Trapping Experiments

A dry 25 mL Schlenk tube containing a straight condensing tube capped with a balloon was charged with 1-(but-3-en-1-yl)-1H-indole **1a** (0.2 mmol, 1.0 equiv.), triphenylsilane **2b** (2.0 mmol, 10.0 equiv.), CuCN (0.04 mmol, 20 mol%), 2,4'-bipyridine (0.04 mmol, 20.0 mol%), DTBP (1.0 mmol, 5.0 equiv.), radical scavenger (2 equiv.), and *t*-BuOH (3.0 mL). The mixtures were vigorously stirred together at 130 °C for 15 h. After completion, the reaction was quenched by saturated brine and then extracted with dichloromethane (3 × 15.0 mL). The combined dichloromethane layer was then dried over anhydrous Na<sub>2</sub>SO<sub>4</sub> and concentrated in vacuum. The residue was purified by flash column chromatography on silica gel afforded the desired product.

## 7. X-ray Crystallographic Data

The X-ray crystallographic structures for **3aa**. ORTEP representation with 50% probability thermal ellipsoids. Solvent and hydrogen are omitted for clarity. Crystal data have been deposited to CCDC, number 2264465.

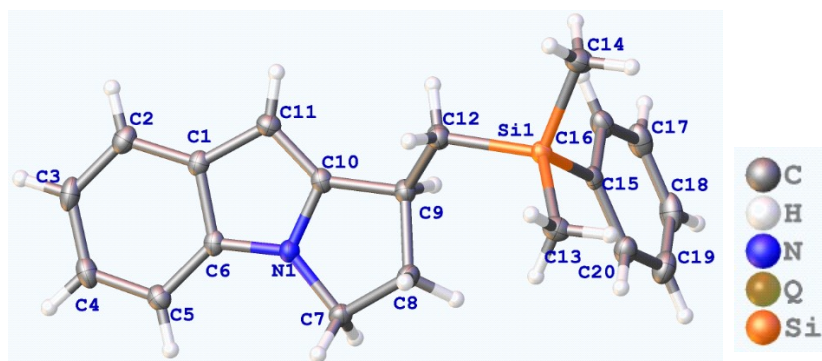

|                                 |                                                                                                                           |
|---------------------------------|---------------------------------------------------------------------------------------------------------------------------|
| Identification code             | <b>3aa</b>                                                                                                                |
| Empirical formula               | C <sub>20</sub> H <sub>23</sub> NSi                                                                                       |
| Formula weight                  | 305.48                                                                                                                    |
| Temperature                     | 150(10) K                                                                                                                 |
| Wavelength                      | 0.71073 Å                                                                                                                 |
| Crystal system, space group     | Monoclinic, P2 <sub>1</sub> /c                                                                                            |
| Unit cell dimensions            | a = 10.1994(8) Å    alpha = 90 deg.<br>b = 12.6675(10) Å    beta = 98.481(7) deg.<br>c = 13.4020(11) Å    gamma = 90 deg. |
| Volume                          | 1712.6 (2) Å <sup>3</sup>                                                                                                 |
| Z, Calculated density           | 4, 1.185 Mg/m <sup>3</sup>                                                                                                |
| Absorption coefficient          | 0.134 mm <sup>-1</sup>                                                                                                    |
| F(000)                          | 656.0                                                                                                                     |
| Crystal size                    | 0.15×0.13×0.12 mm                                                                                                         |
| Theta range for data collection | 4.038 to 49.996 deg.                                                                                                      |
| Limiting indices                | -9 ≤ h ≤ 12, -15 ≤ k ≤ 13, -15 ≤ l ≤ 15                                                                                   |
| Reflections collected / unique  | 8031 / 3013 [R(int) = 0.0244]                                                                                             |
| Completeness to theta = 25.00   | 99.99%                                                                                                                    |

|                                   |                                     |
|-----------------------------------|-------------------------------------|
| Refinement method                 | Goodness-of-fit on F <sup>2</sup> - |
| Data / restraints / parameters    | 3013 / 0 / 201                      |
| Goodness-of-fit on F <sup>2</sup> | 1.061                               |
| Final R indices [I>2sigma(I)]     | R1 = 0.0418, wR2 = 0.1011           |
| R indices (all data)              | R1 = 0.0521, wR2 = 0.1077           |

## 8. References

- [1] Gerry, C. J.; Hua, B. K.; Wawer, M. J.; Knowles, J. P.; Nelson, Jr S. D.; Boskovic, Z. V. Real-Time Biological Annotation of Synthetic Compounds. *J. Am. Chem. Soc.* **2016**, *138*, 8920-8927.

## 9. NMR Spectra of New Compounds

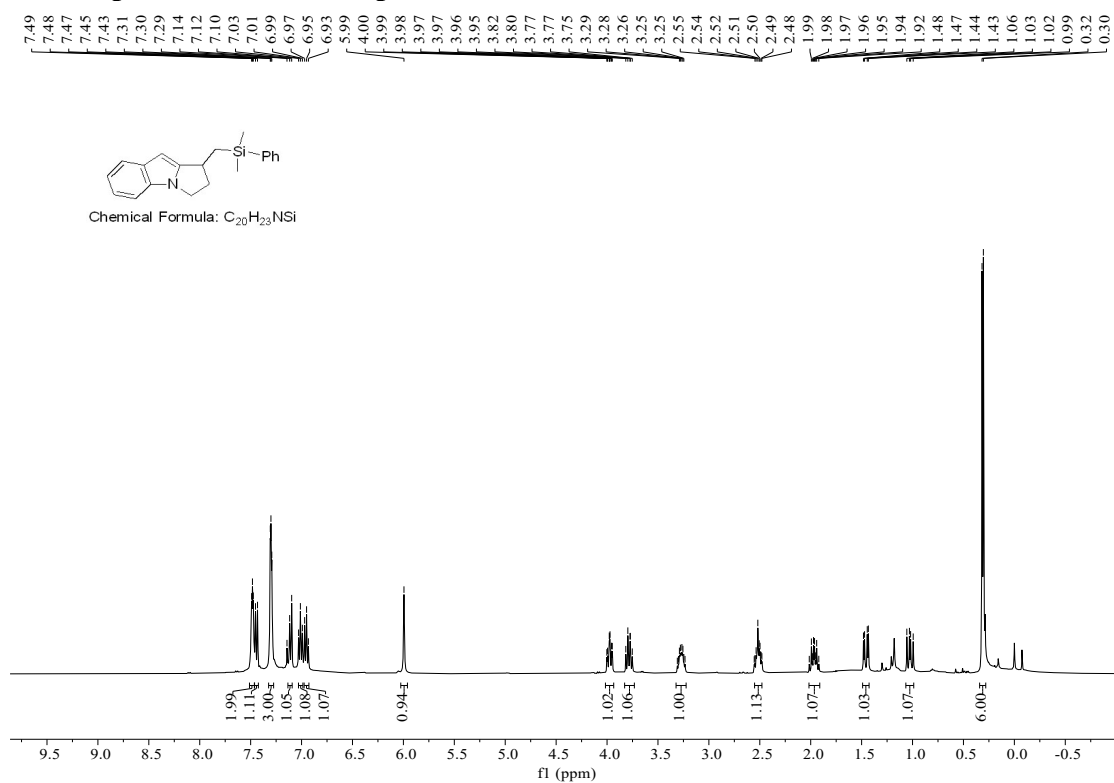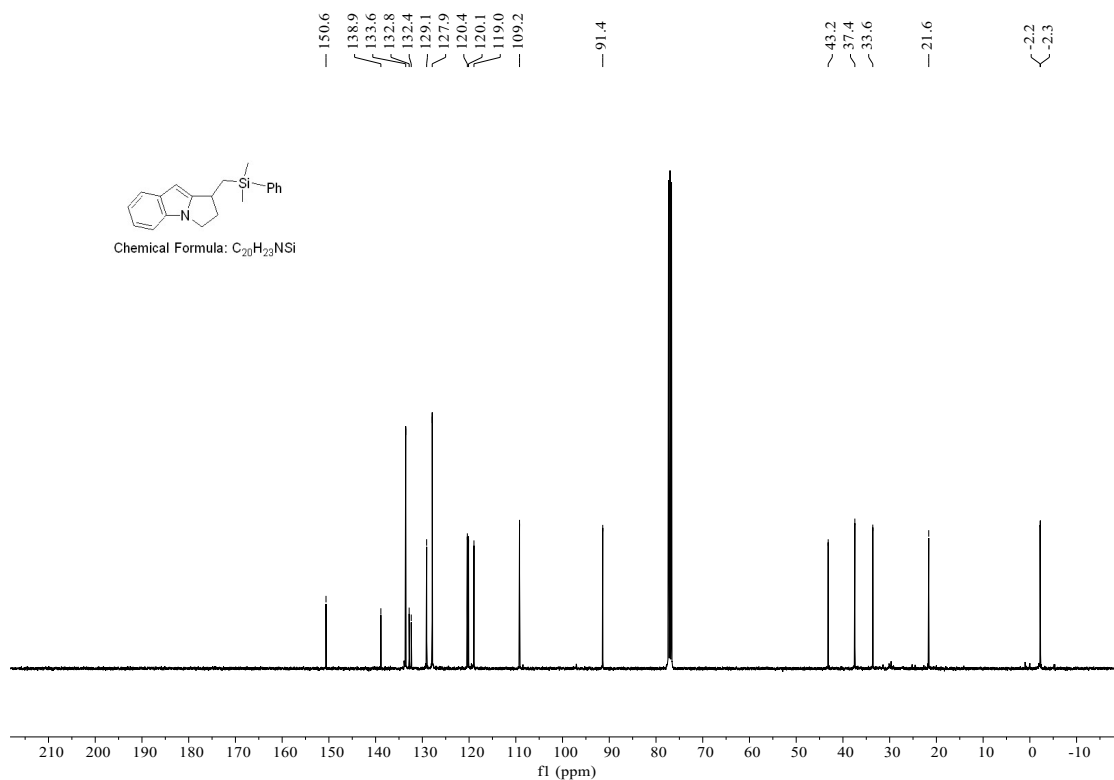

Fig. S1  $^1H$  NMR (400 MHz,  $CDCl_3$ ),  $^{13}C$  NMR (100 MHz,  $CDCl_3$ ) of **3aa**

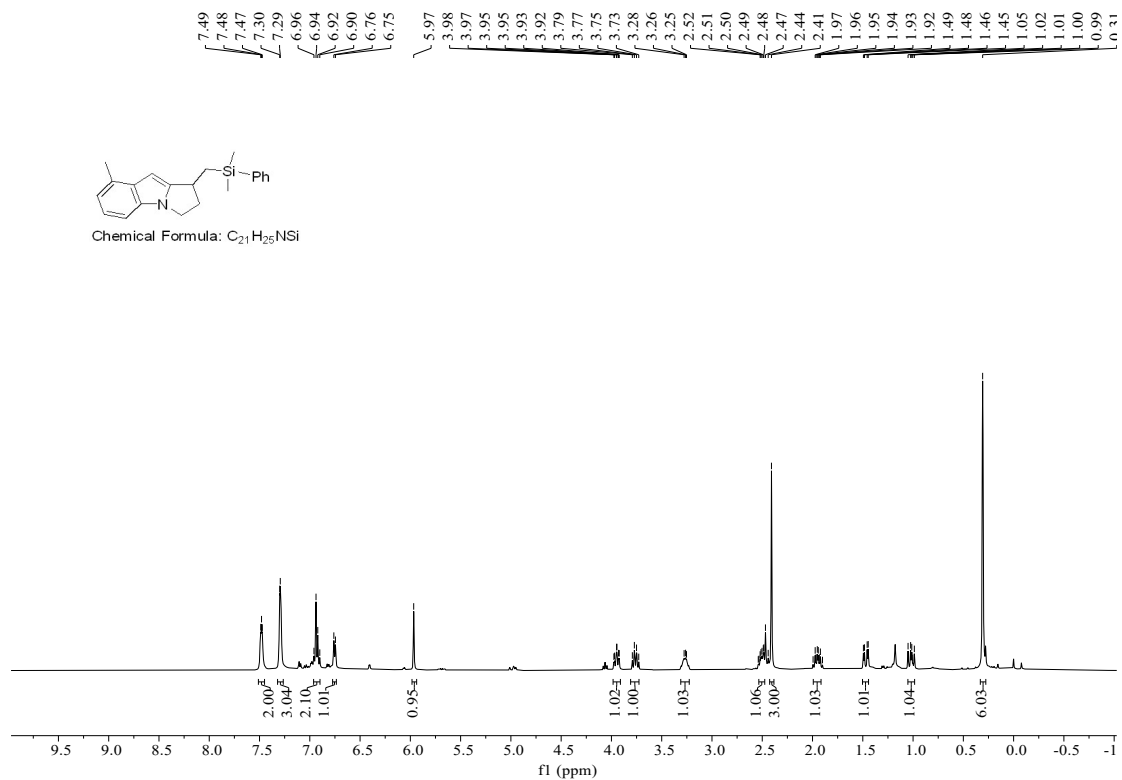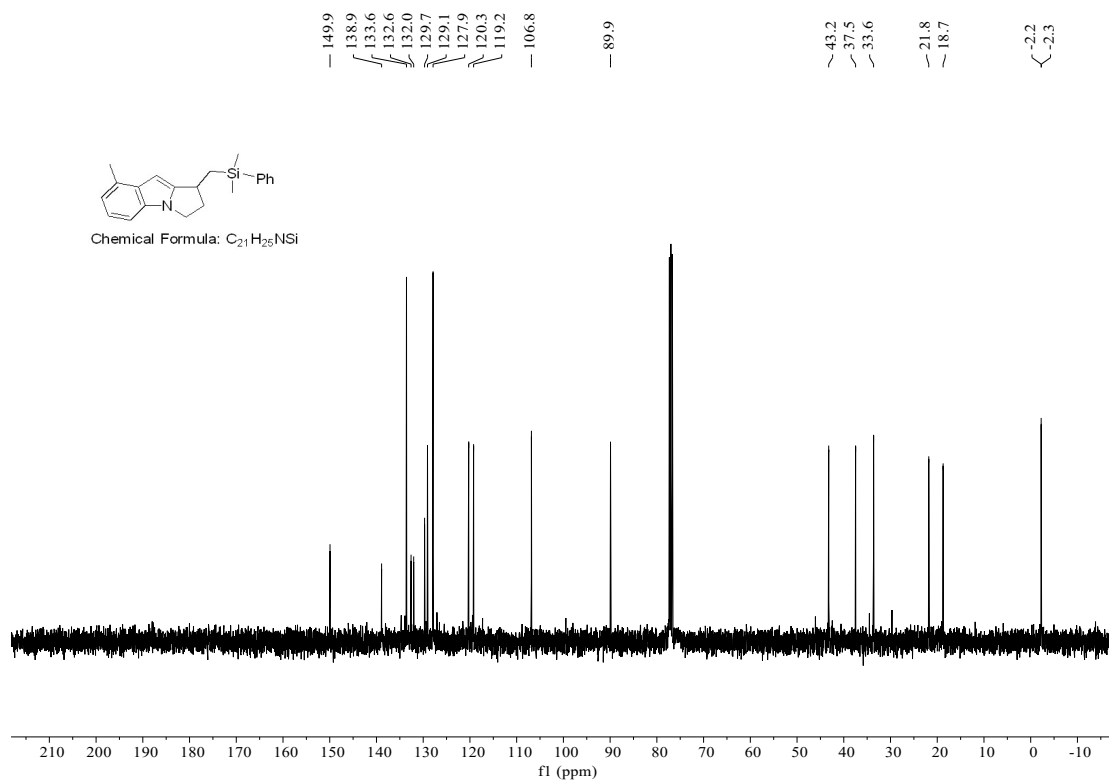

Fig. S2  $^1H$  NMR (400 MHz,  $CDCl_3$ ),  $^{13}C$  NMR (100 MHz,  $CDCl_3$ ) of **3ab**

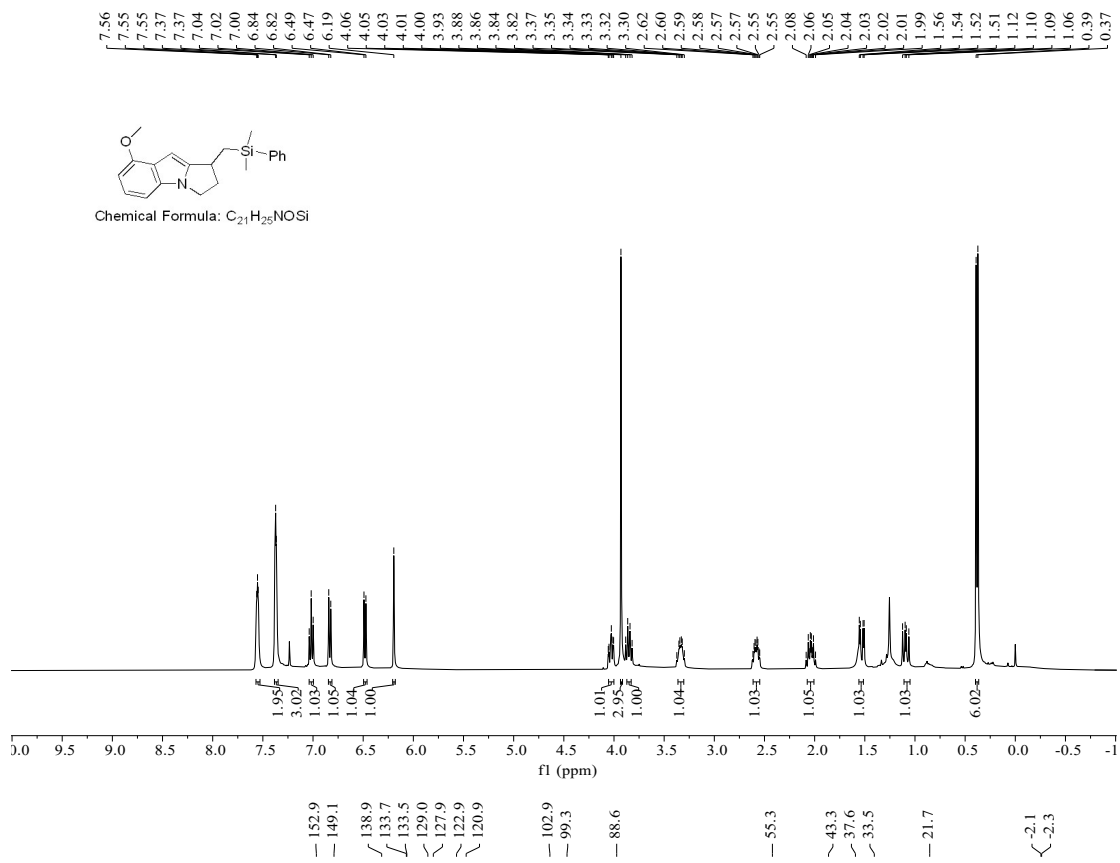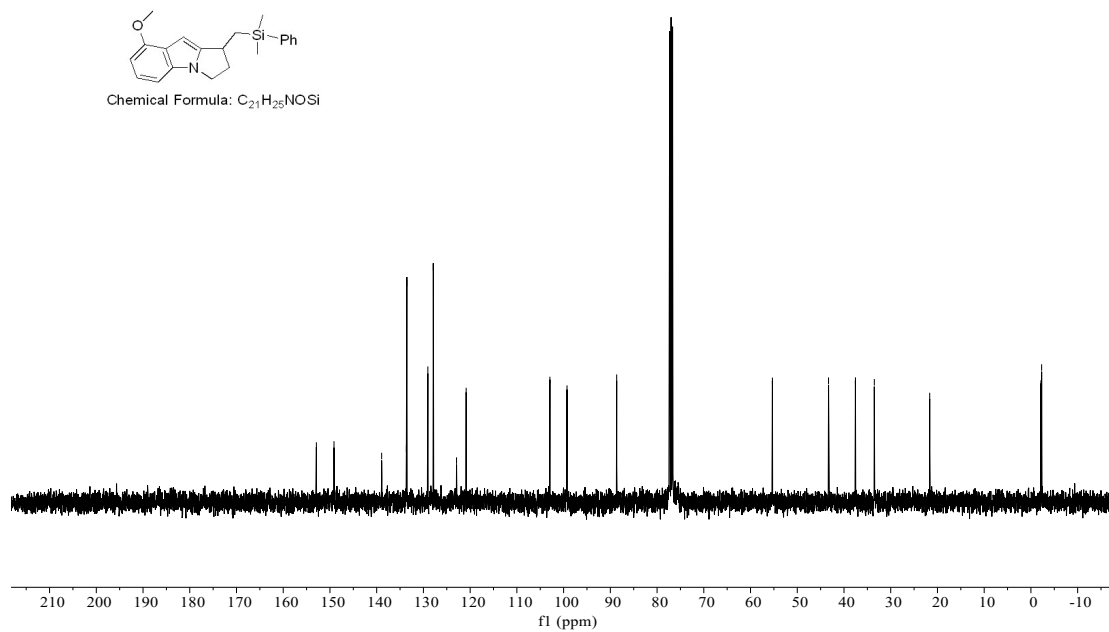

Fig. S3  $^1H$  NMR (400 MHz,  $CDCl_3$ ),  $^{13}C$  NMR (100 MHz,  $CDCl_3$ ) of **3ac**

7.56  
7.56  
7.55  
7.39  
7.38  
7.37  
7.02  
7.00  
6.98  
6.98  
6.96  
6.94  
6.73  
6.71  
6.71  
6.69  
6.15  
4.07  
4.06  
4.05  
4.04  
4.02  
4.02  
4.02  
3.90  
3.88  
3.85  
3.83  
3.36  
3.35  
3.33  
3.32  
3.31  
3.30  
2.64  
2.63  
2.62  
2.61  
2.60  
2.59  
2.58  
2.57  
2.56  
2.11  
2.09  
2.08  
2.07  
2.06  
2.04  
2.03  
1.56  
1.55  
1.52  
1.51  
1.14  
1.11  
1.10  
1.07  
0.40  
0.38

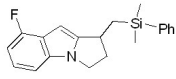

Chemical Formula: C<sub>20</sub>H<sub>22</sub>FNSi

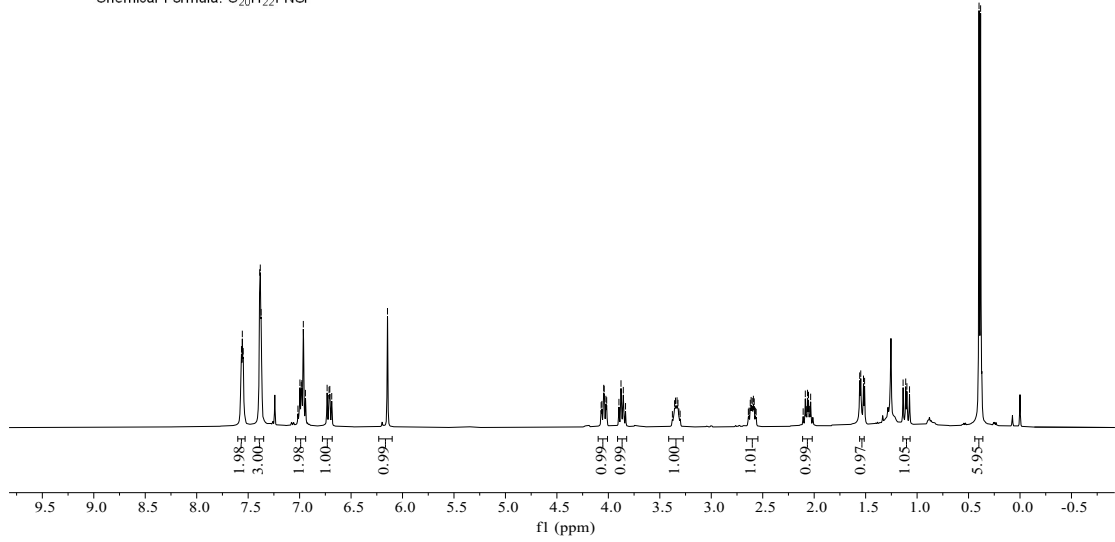

150.6  
138.7  
133.5  
129.1  
127.9  
120.5  
120.4  
105.4  
105.4  
104.0  
103.8  
87.6  
43.4  
37.5  
33.6  
21.6  
2.2  
2.3

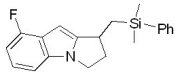

Chemical Formula: C<sub>20</sub>H<sub>22</sub>FNSi

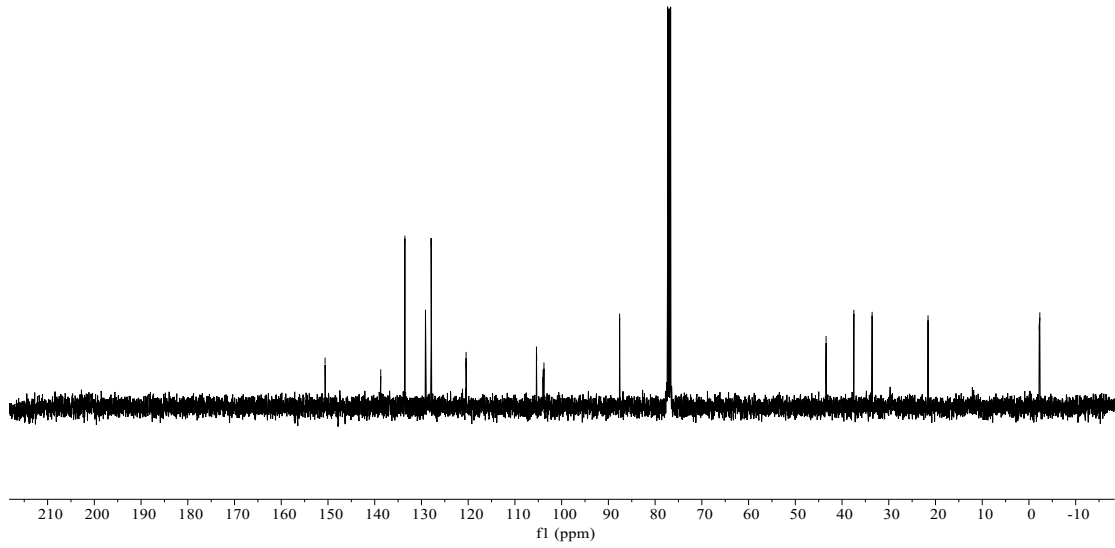



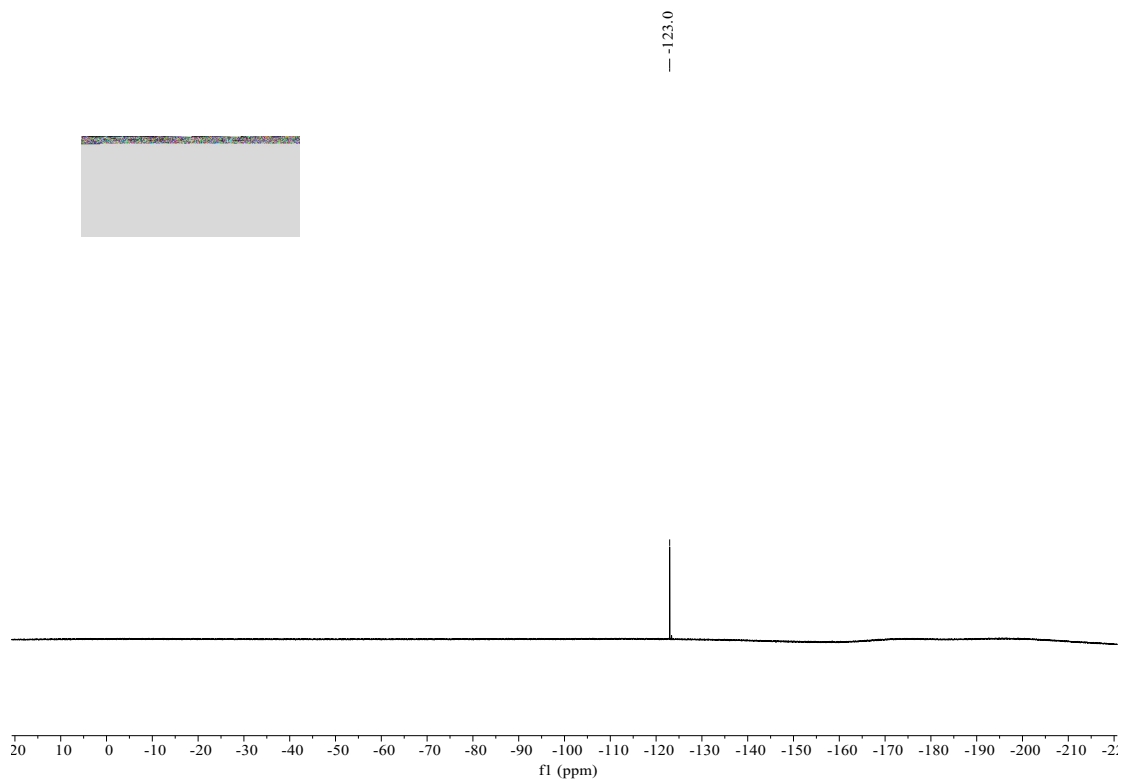

Fig. S4  $^1\text{H}$  NMR (400 MHz,  $\text{CDCl}_3$ ),  $^{13}\text{C}$  NMR (100 MHz,  $\text{CDCl}_3$ ),  $^{19}\text{F}$  NMR (376 MHz,  $\text{CDCl}_3$ ) of **3ad**

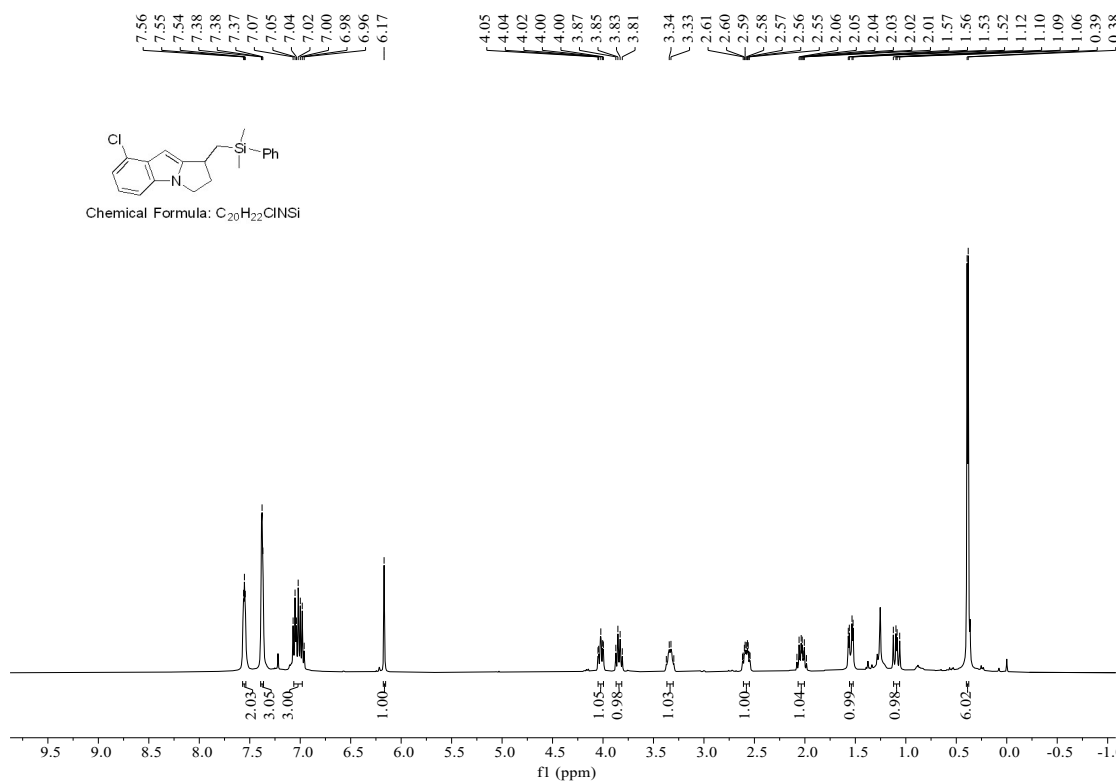

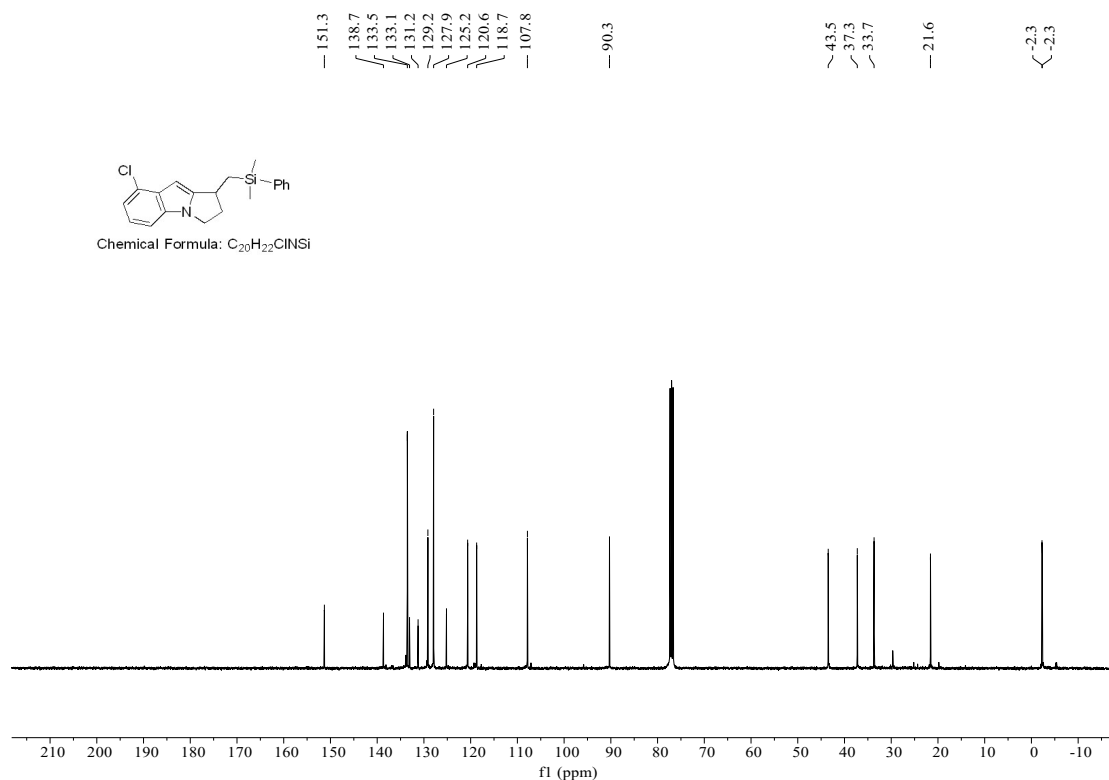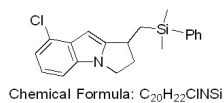

Fig. S5 <sup>1</sup>H NMR (400 MHz, CDCl<sub>3</sub>), <sup>13</sup>C NMR (100 MHz, CDCl<sub>3</sub>) of **3ae**

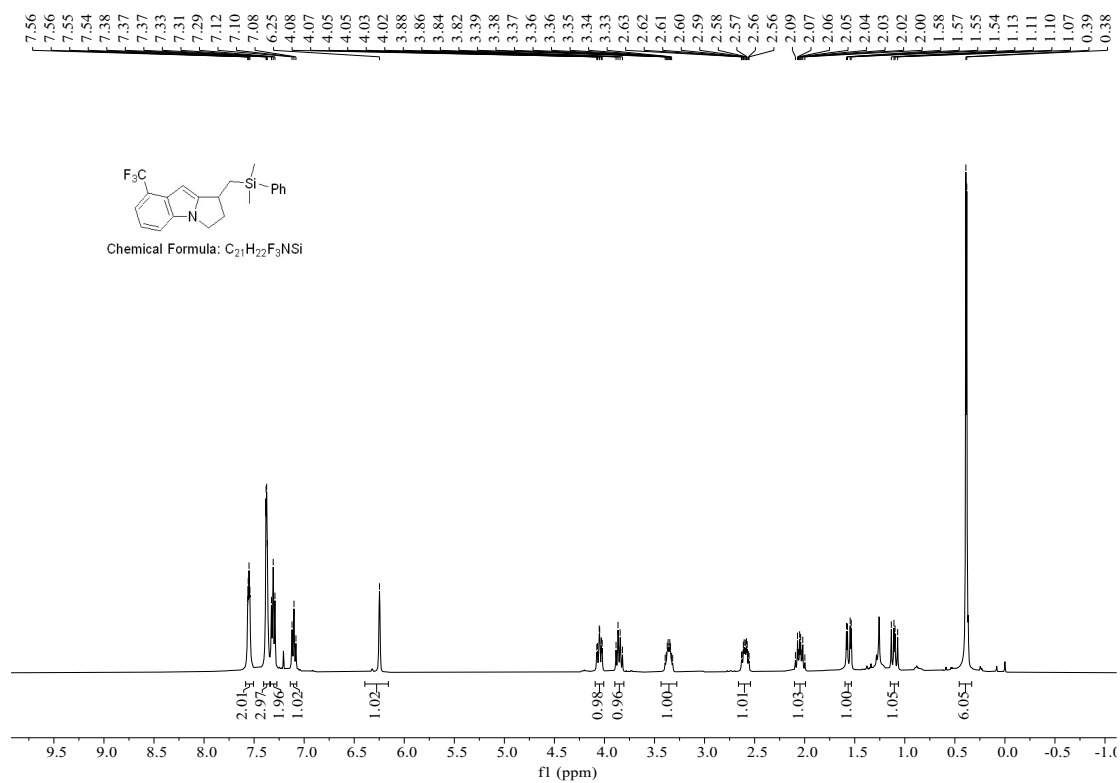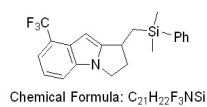

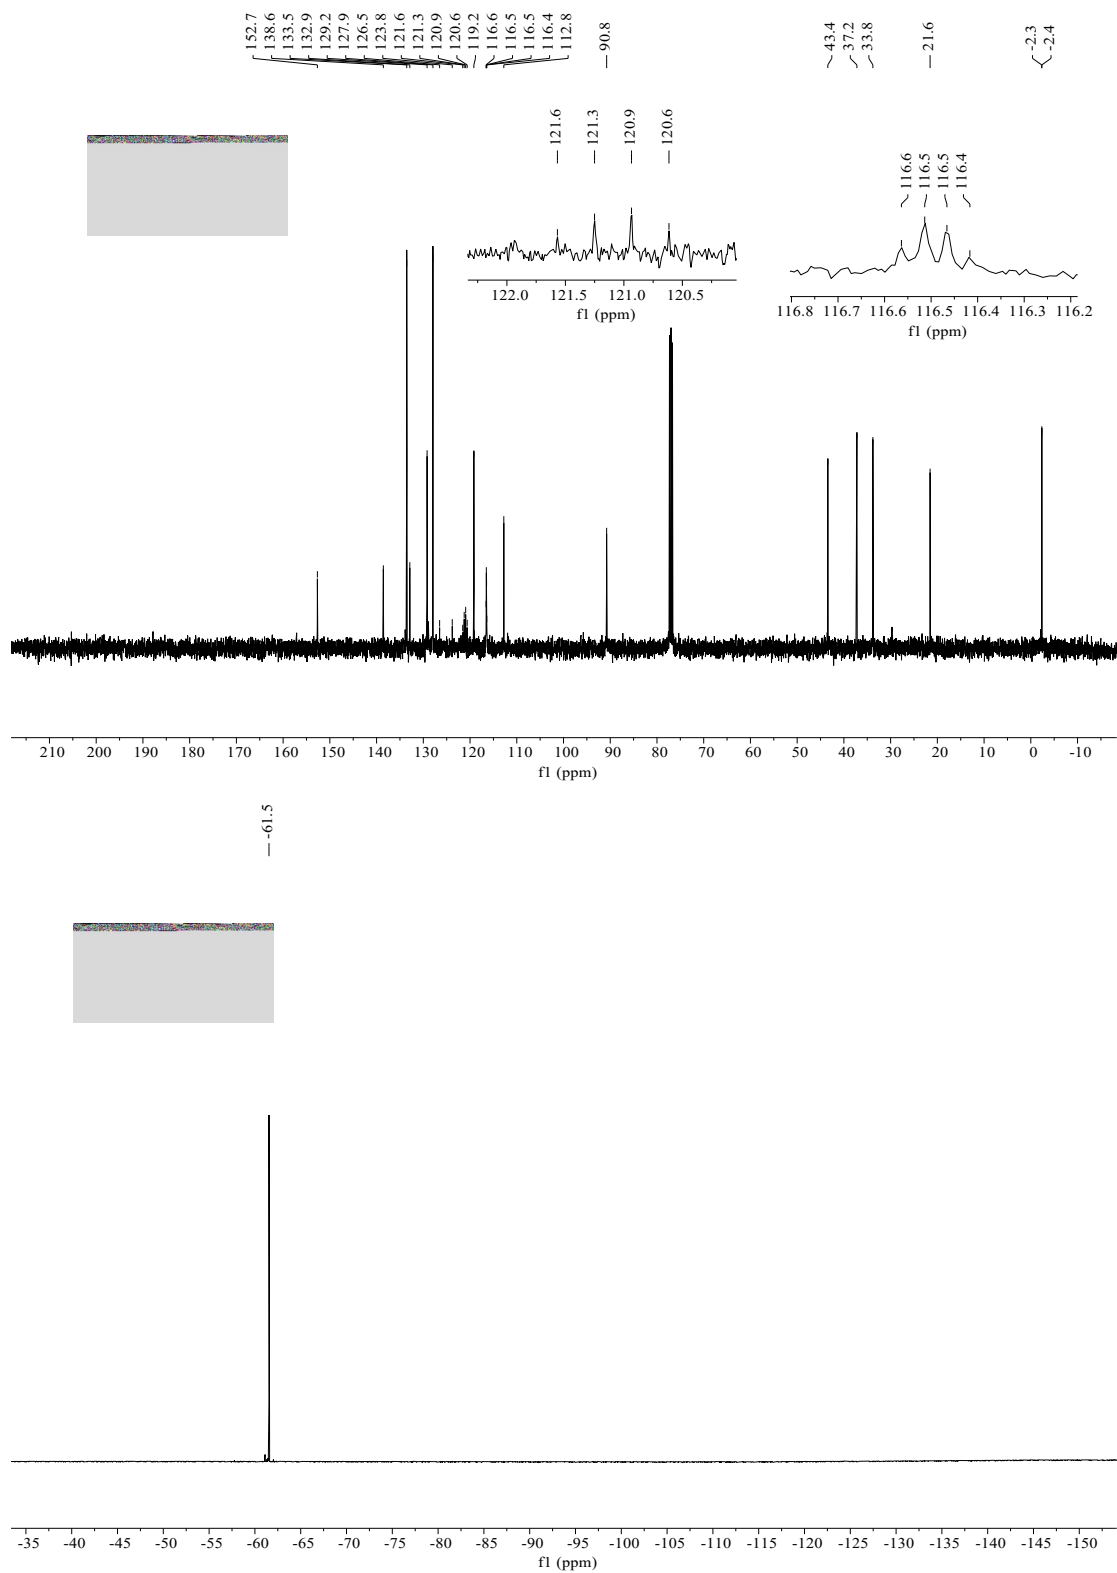

Fig. S6 <sup>1</sup>H NMR (400 MHz, CDCl<sub>3</sub>), <sup>13</sup>C NMR (100 MHz, CDCl<sub>3</sub>), <sup>19</sup>F NMR (376 MHz, CDCl<sub>3</sub>) of **3af**

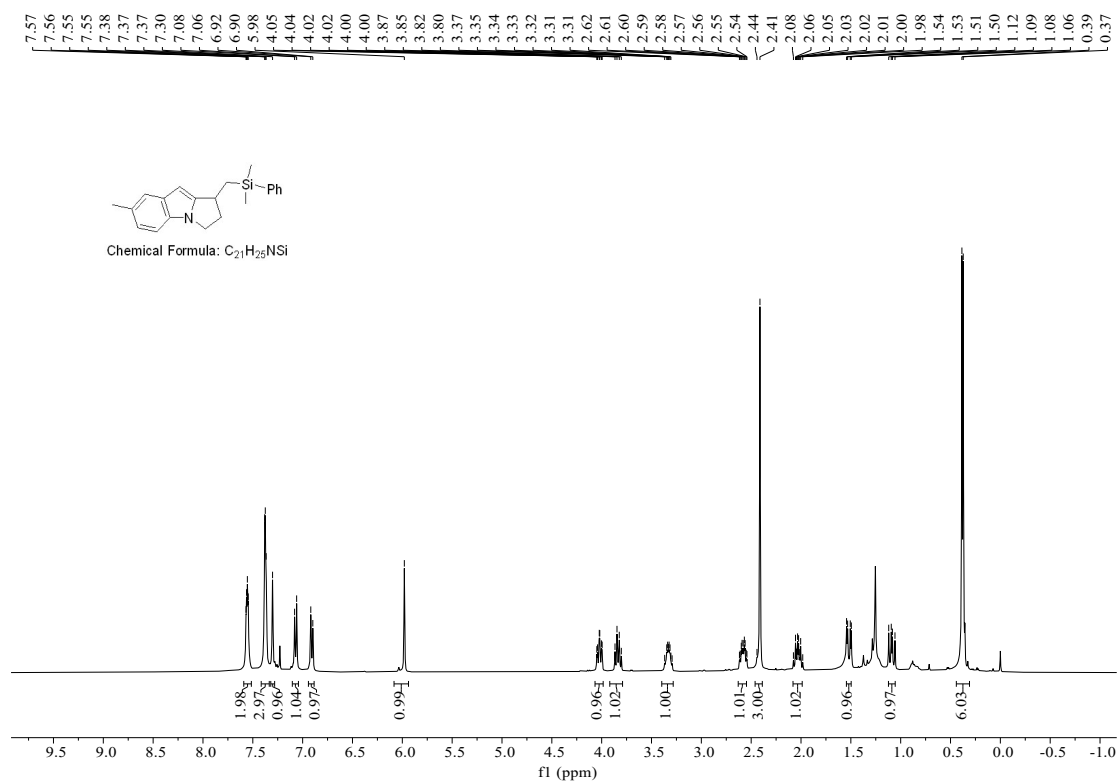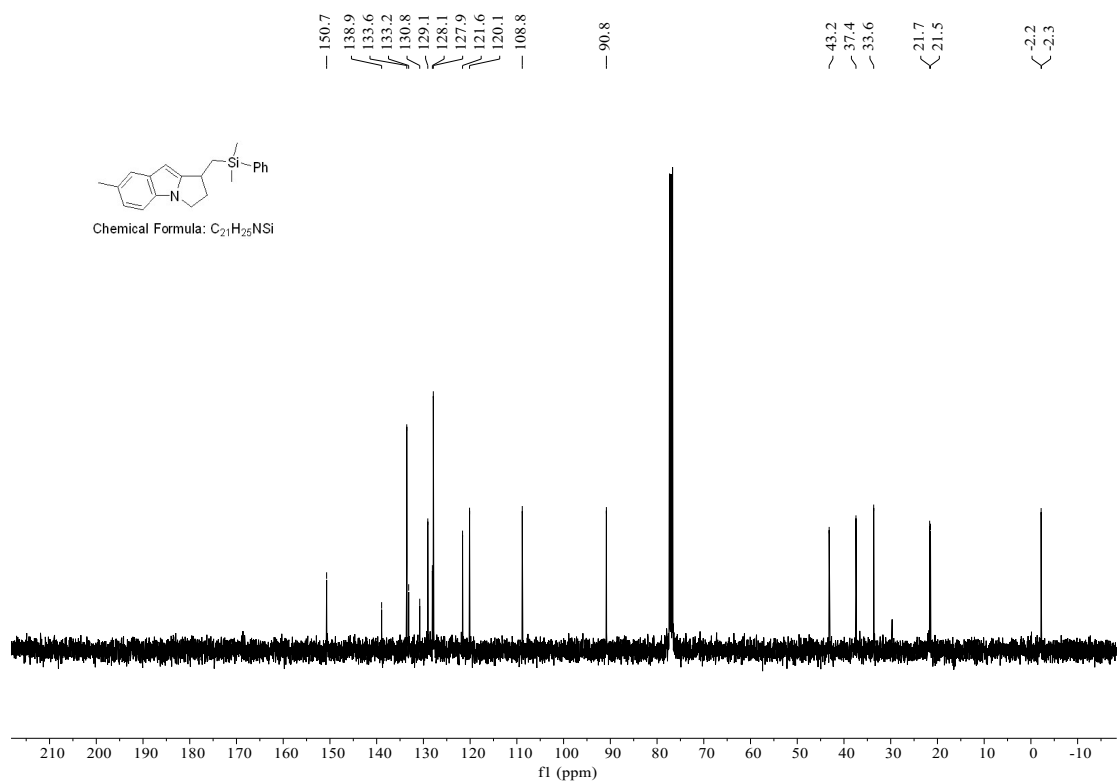

Fig. S7  $^1H$  NMR (400 MHz,  $CDCl_3$ ),  $^{13}C$  NMR (100 MHz,  $CDCl_3$ ) of **3ag**

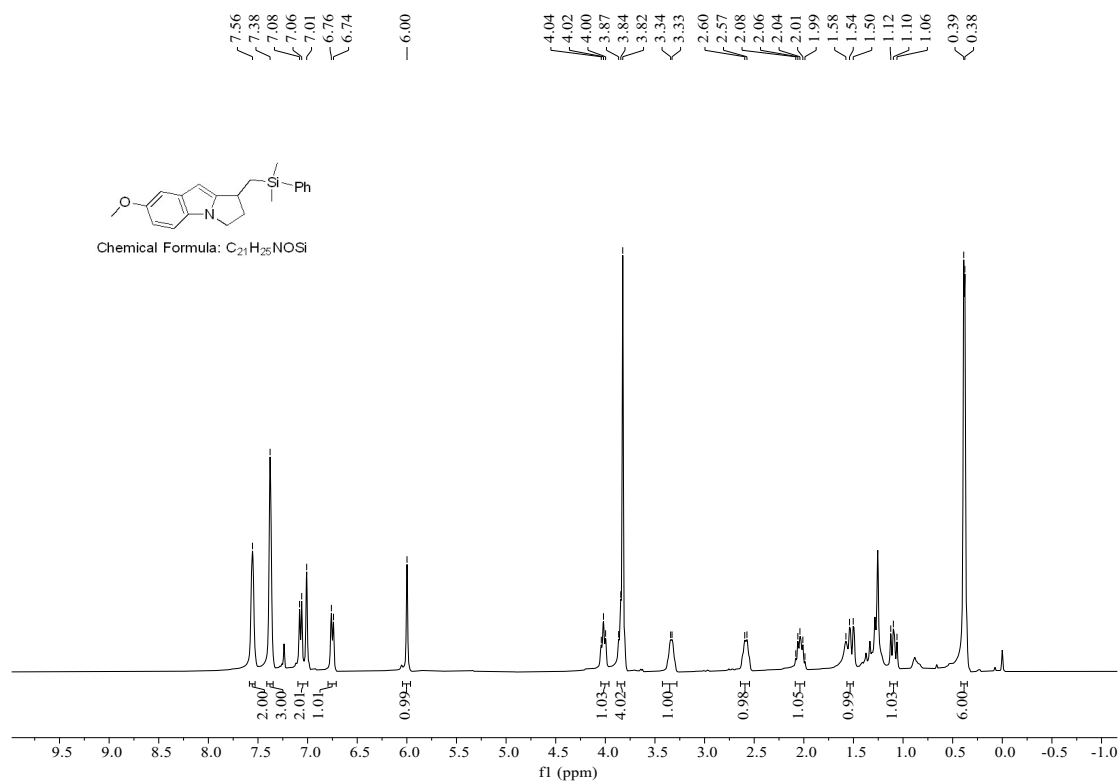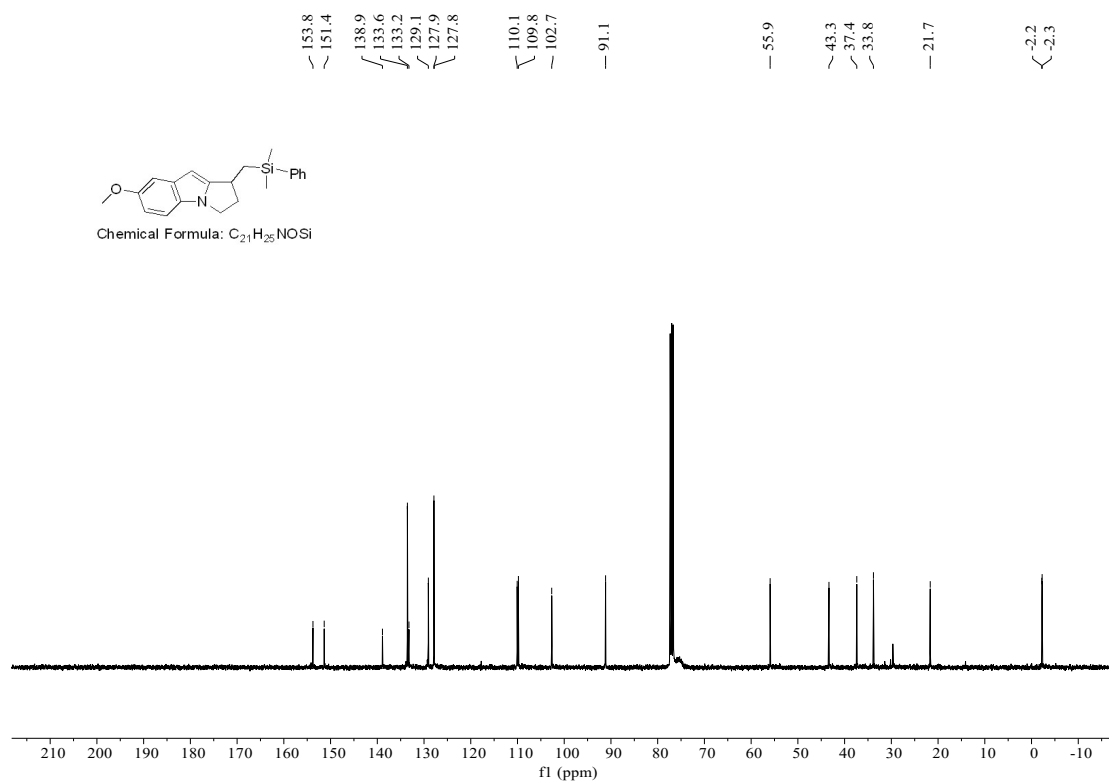

Fig. S8  $^1H$  NMR (400 MHz,  $CDCl_3$ ),  $^{13}C$  NMR (100 MHz,  $CDCl_3$ ) of **3ah**

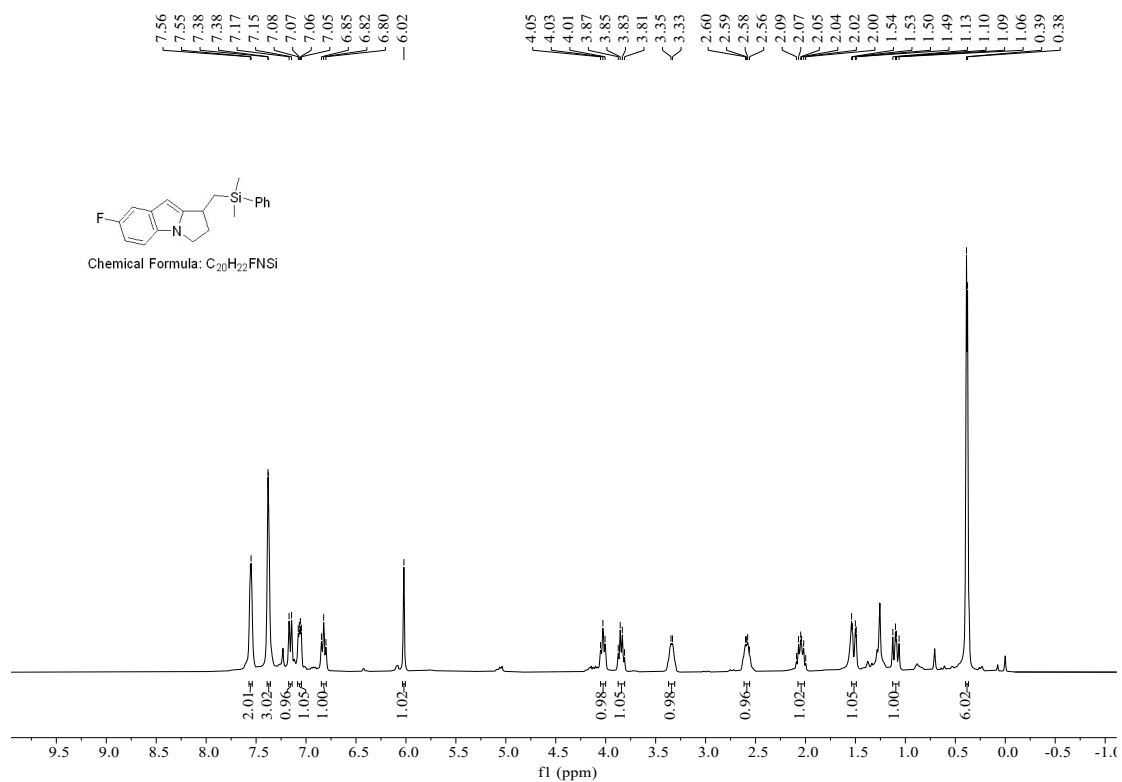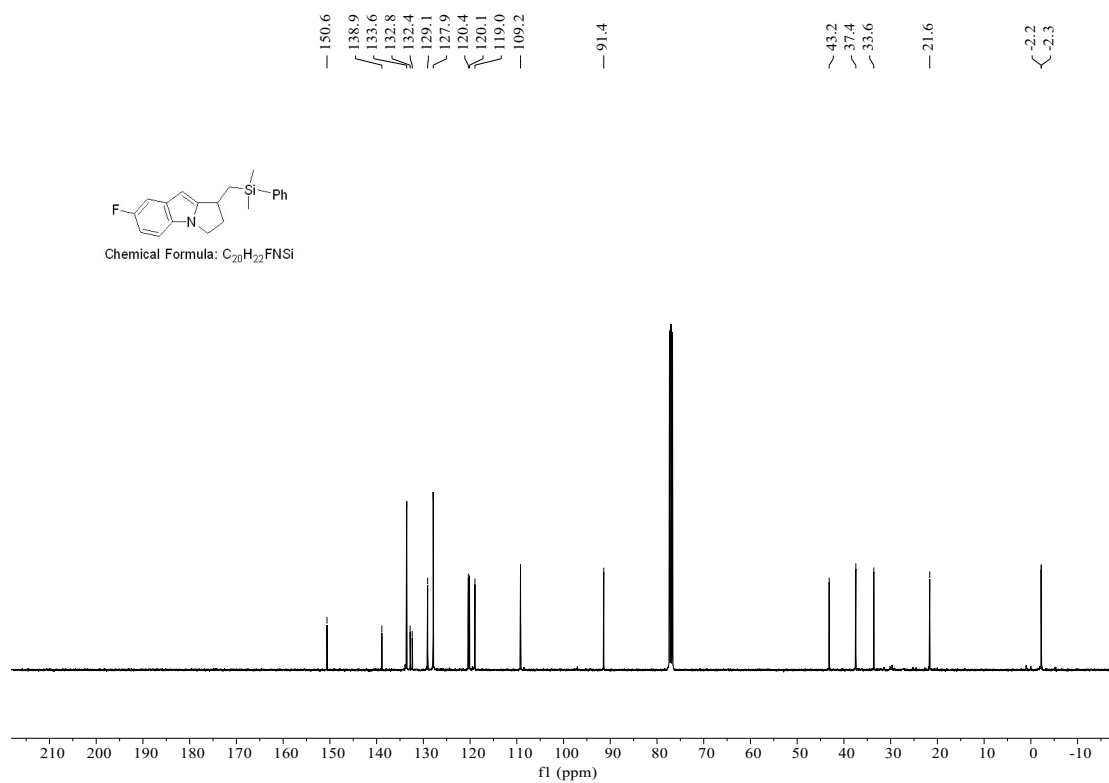

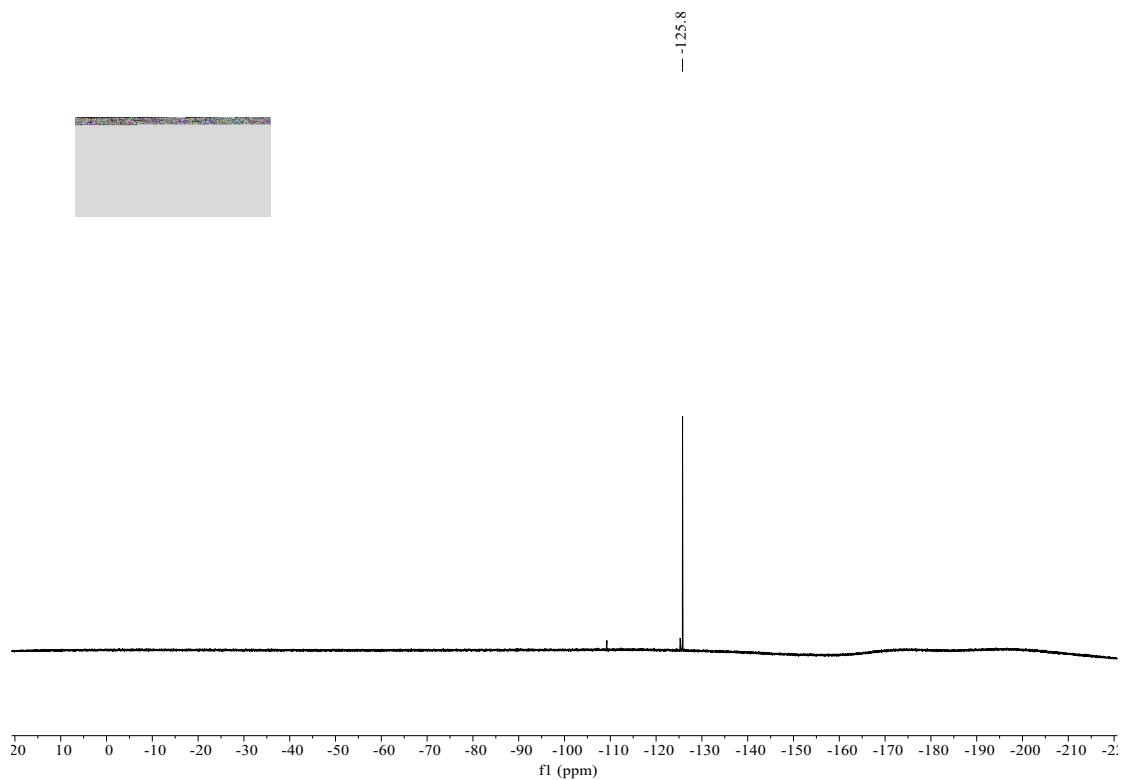

Fig. S9  $^1\text{H}$  NMR (400 MHz,  $\text{CDCl}_3$ ),  $^{13}\text{C}$  NMR (100 MHz,  $\text{CDCl}_3$ ),  $^{19}\text{F}$  NMR (376 MHz,  $\text{CDCl}_3$ ) of **3ai**

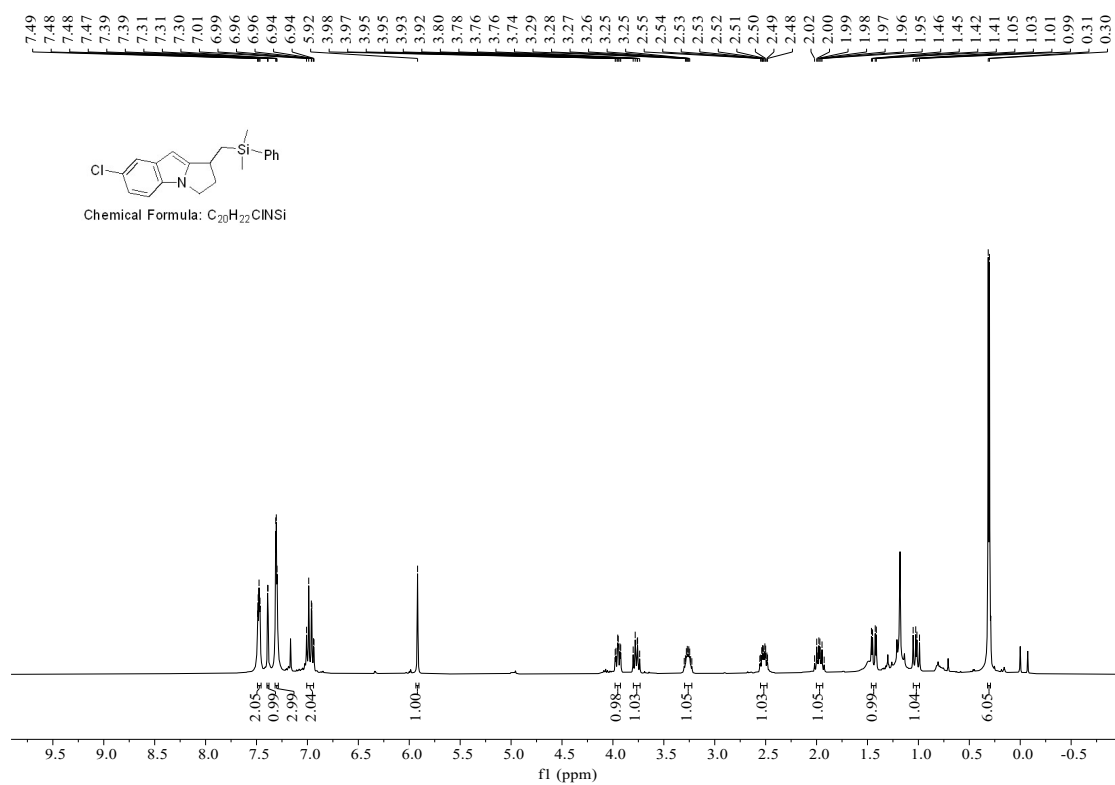





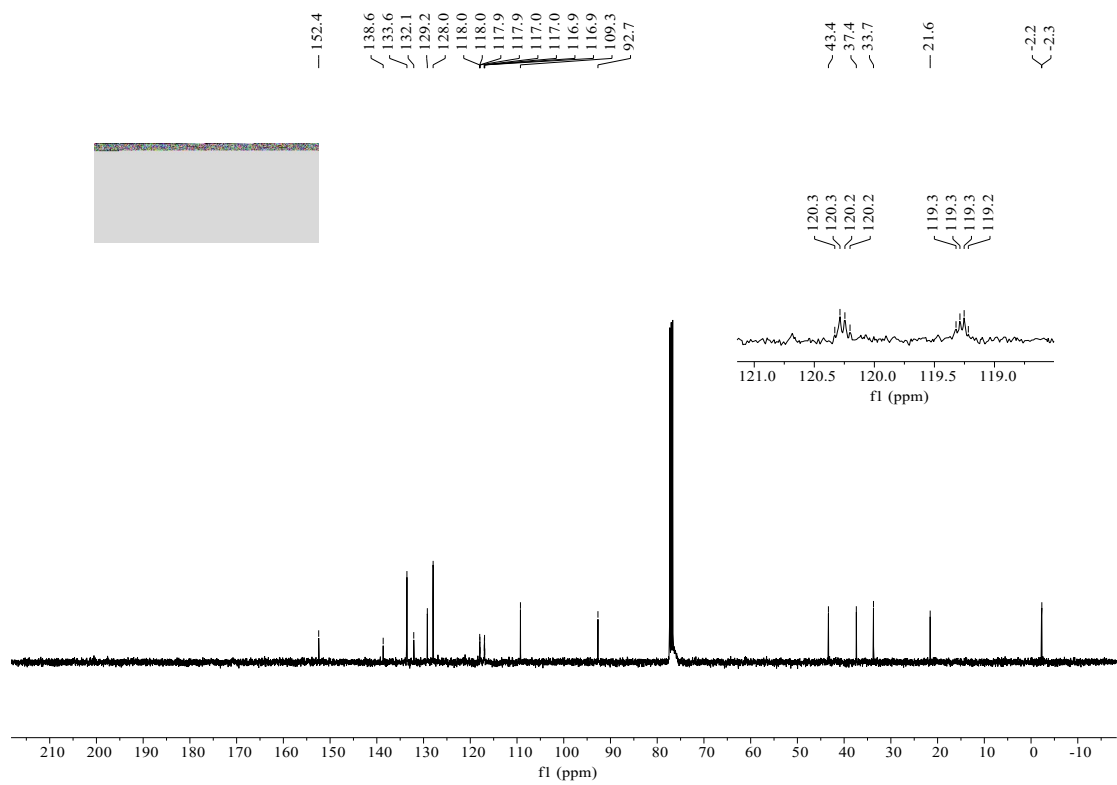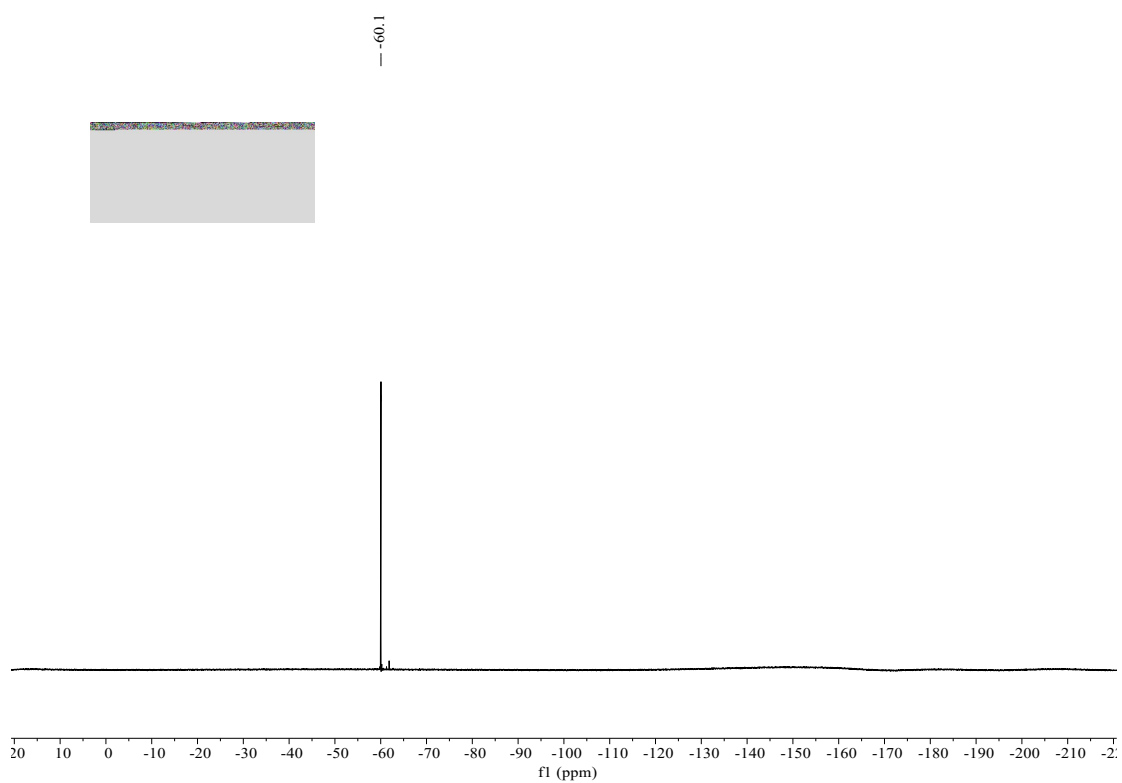

Fig. S11  $^1\text{H}$  NMR (400 MHz,  $\text{CDCl}_3$ ),  $^{13}\text{C}$  NMR (100 MHz,  $\text{CDCl}_3$ ),  $^{19}\text{F}$  NMR (376 MHz,  $\text{CDCl}_3$ ) of **3ak**

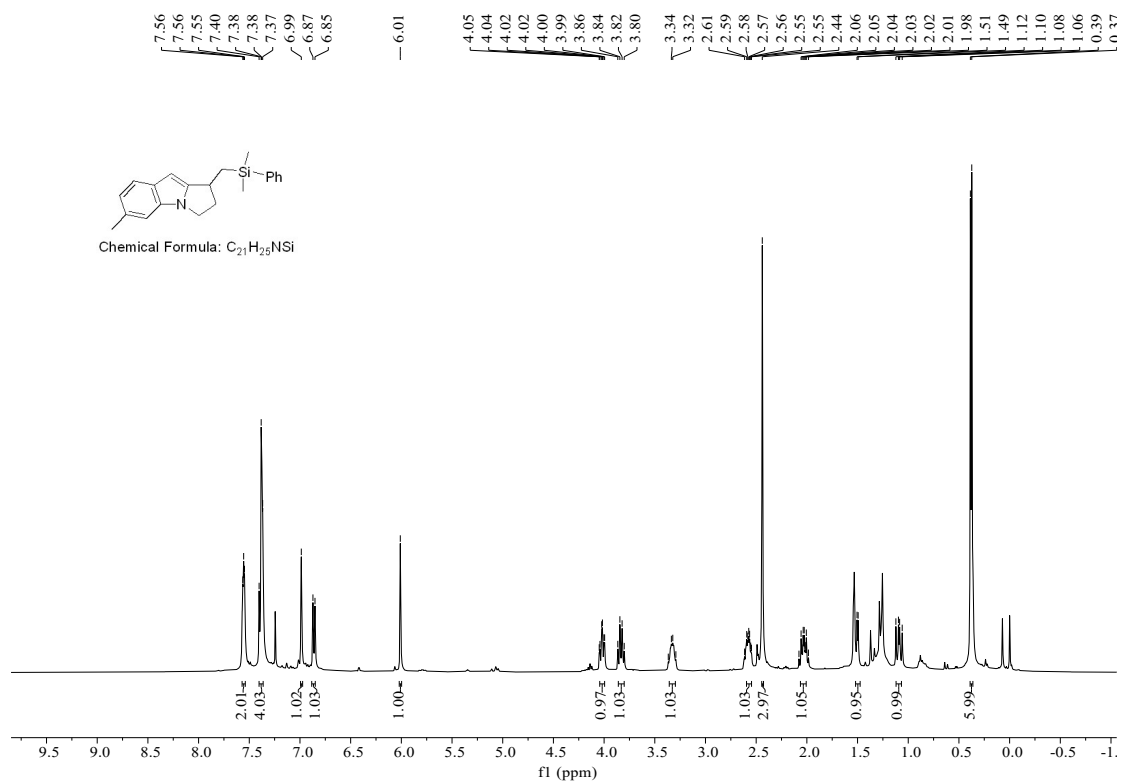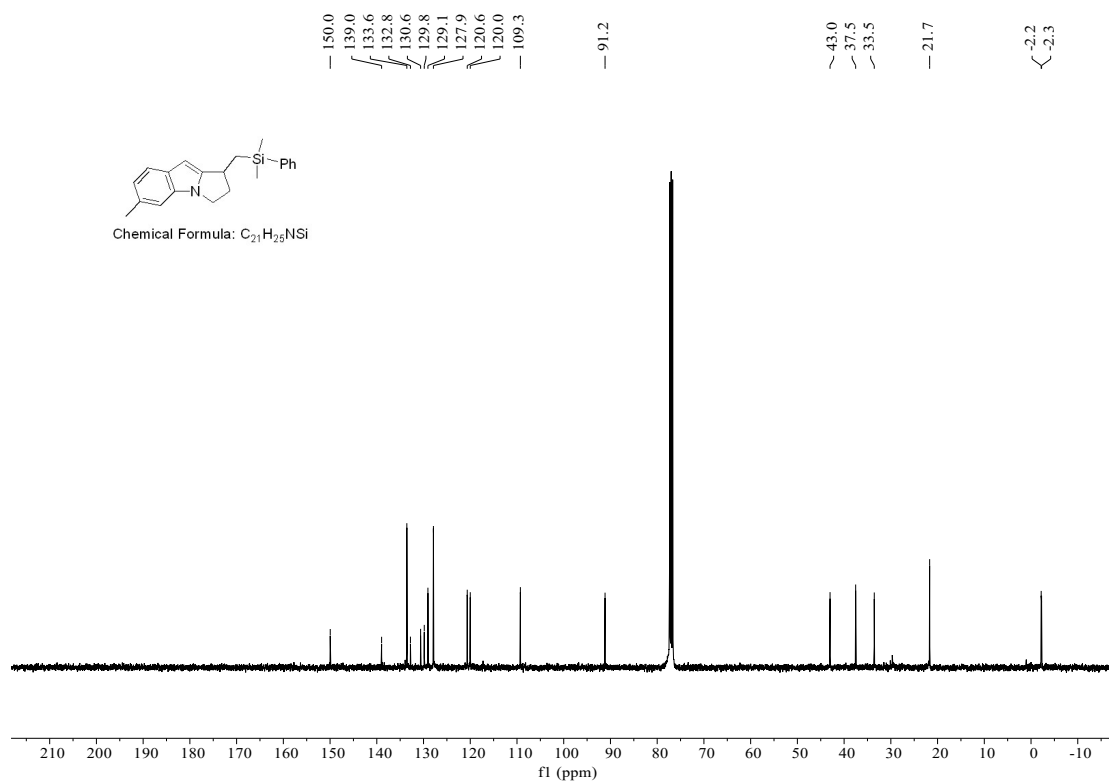

Fig. S12  $^1H$  NMR (400 MHz,  $CDCl_3$ ),  $^{13}C$  NMR (100 MHz,  $CDCl_3$ ) of **3al**

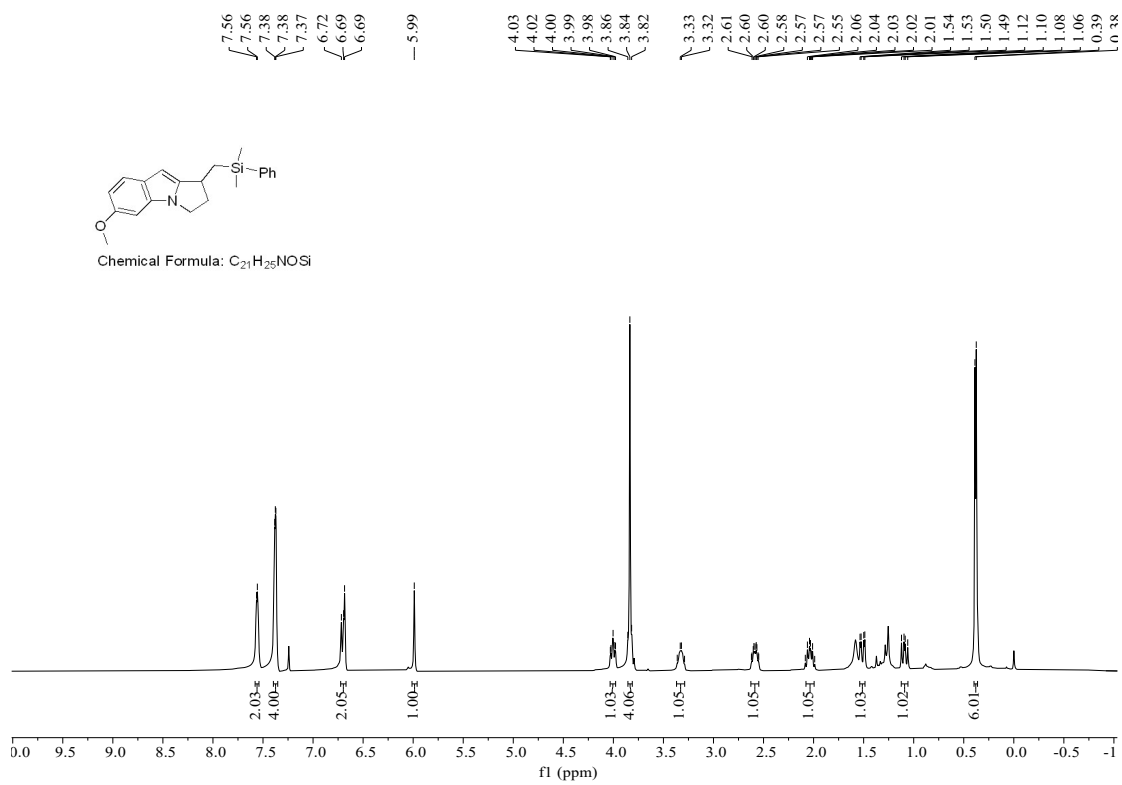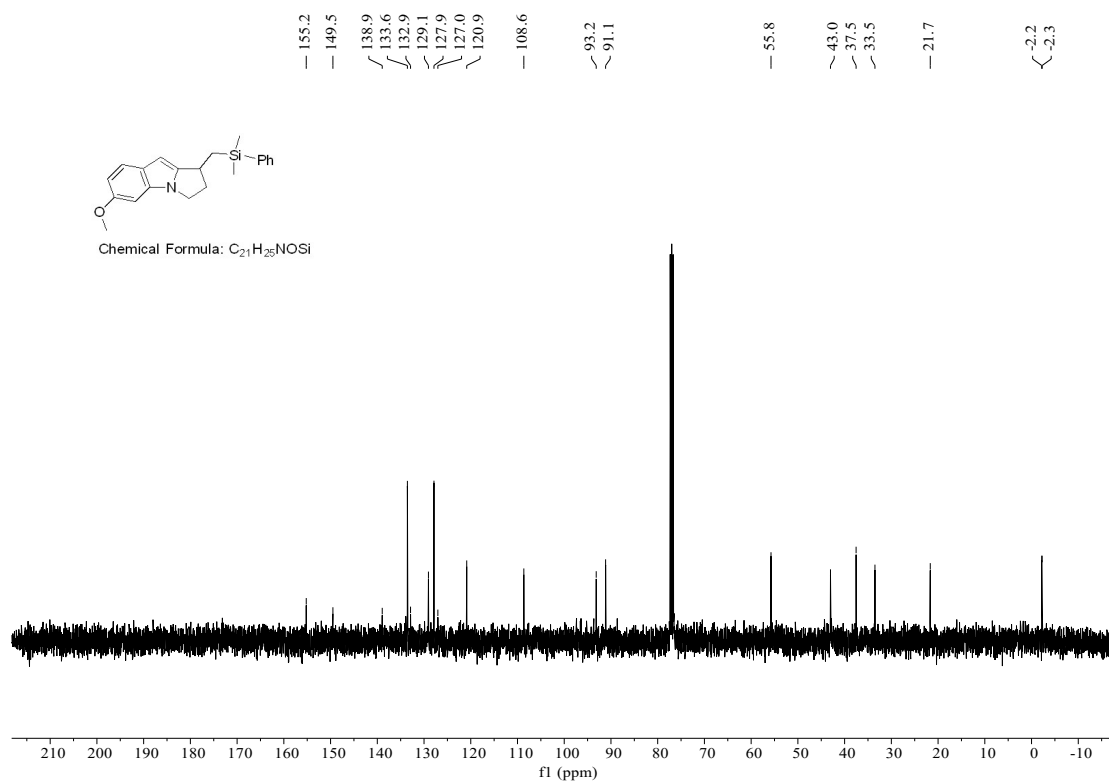

Fig. S13 <sup>1</sup>H NMR (400 MHz, CDCl<sub>3</sub>), <sup>13</sup>C NMR (100 MHz, CDCl<sub>3</sub>) of 3am

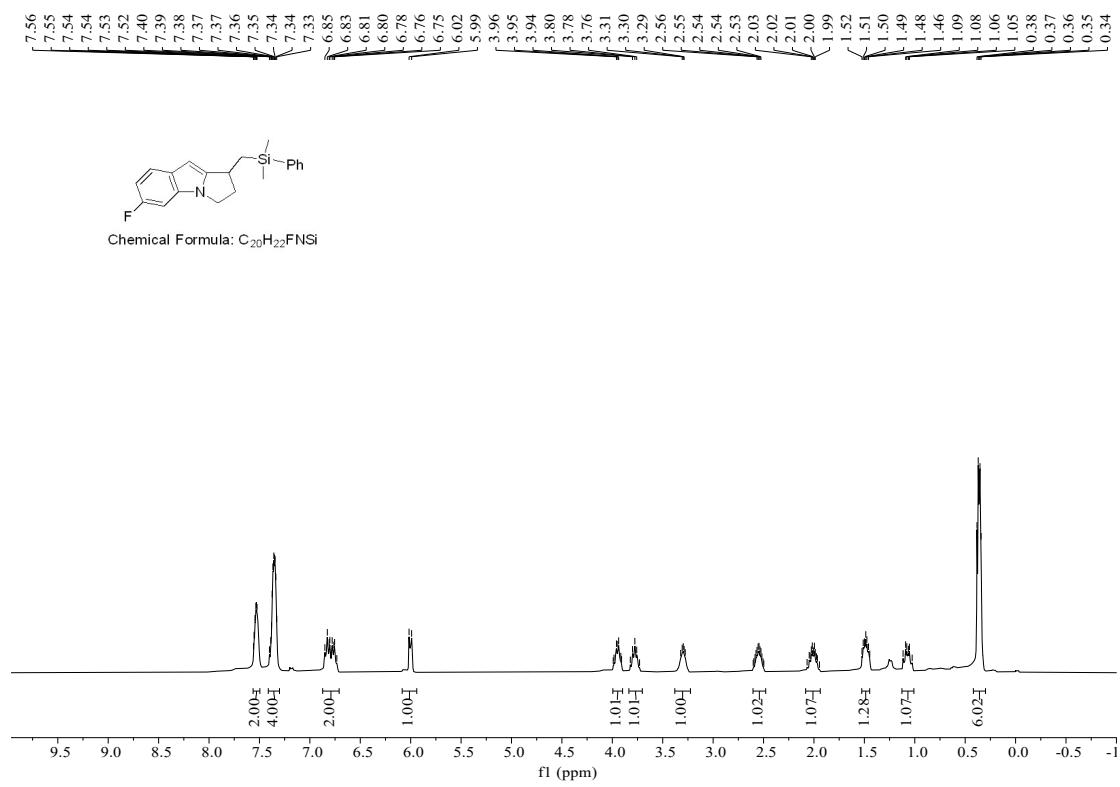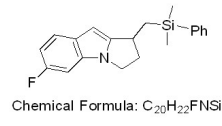

151.1  
 151.0  
 138.8  
 133.5  
 127.9  
 120.8  
 120.7  
 107.5  
 107.3  
 95.8  
 95.5  
 91.5  
 43.2  
 37.4  
 33.6  
 21.6  
 2.2  
 2.3

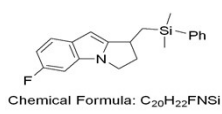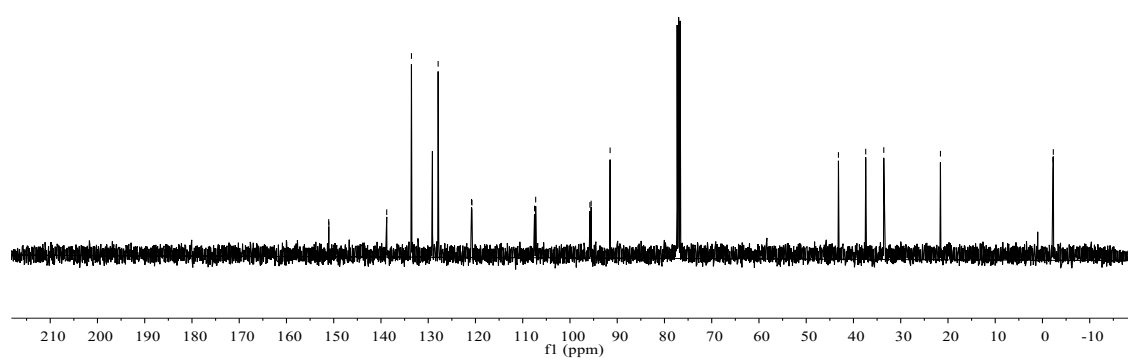

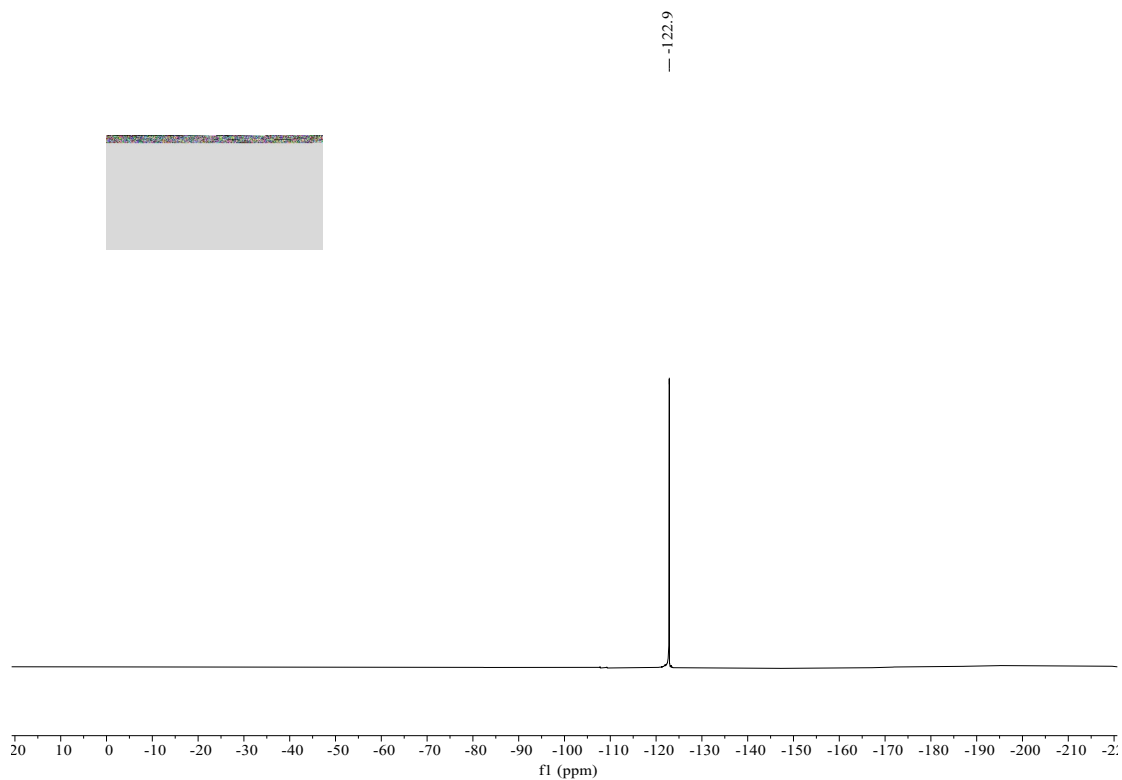

Fig. S14  $^1\text{H}$  NMR (400 MHz,  $\text{CDCl}_3$ ),  $^{13}\text{C}$  NMR (100 MHz,  $\text{CDCl}_3$ ) of **3an**

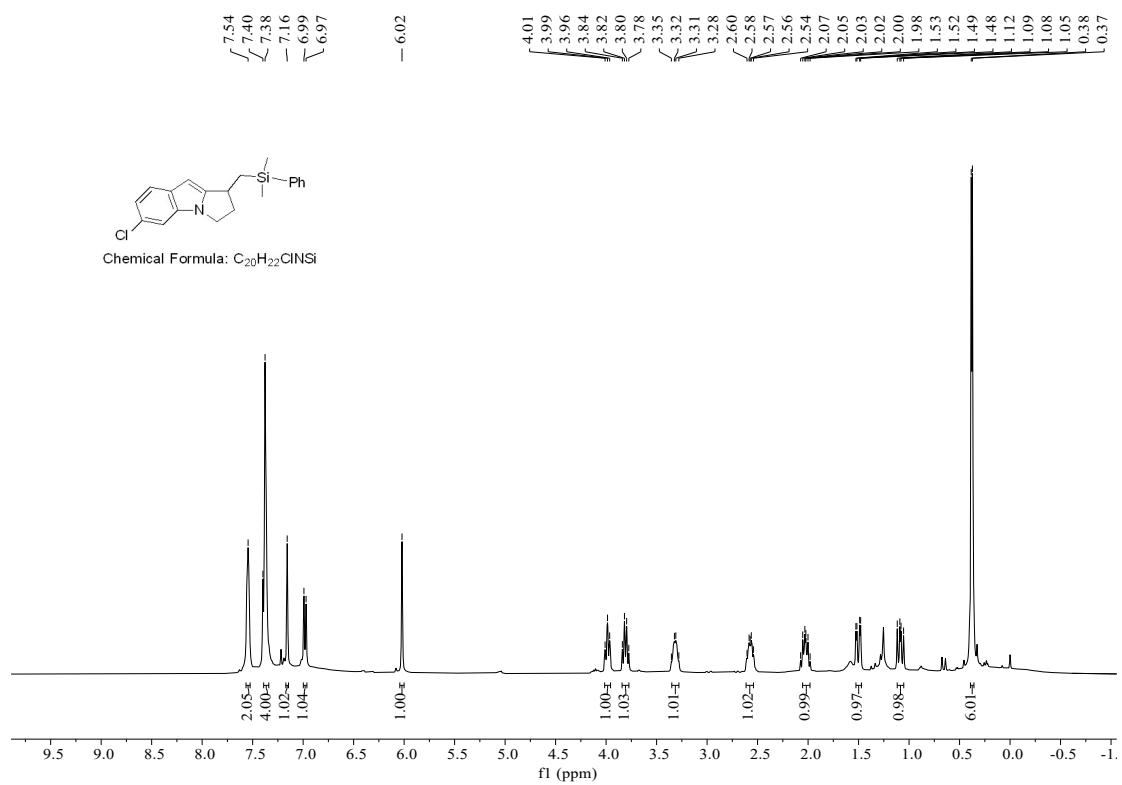

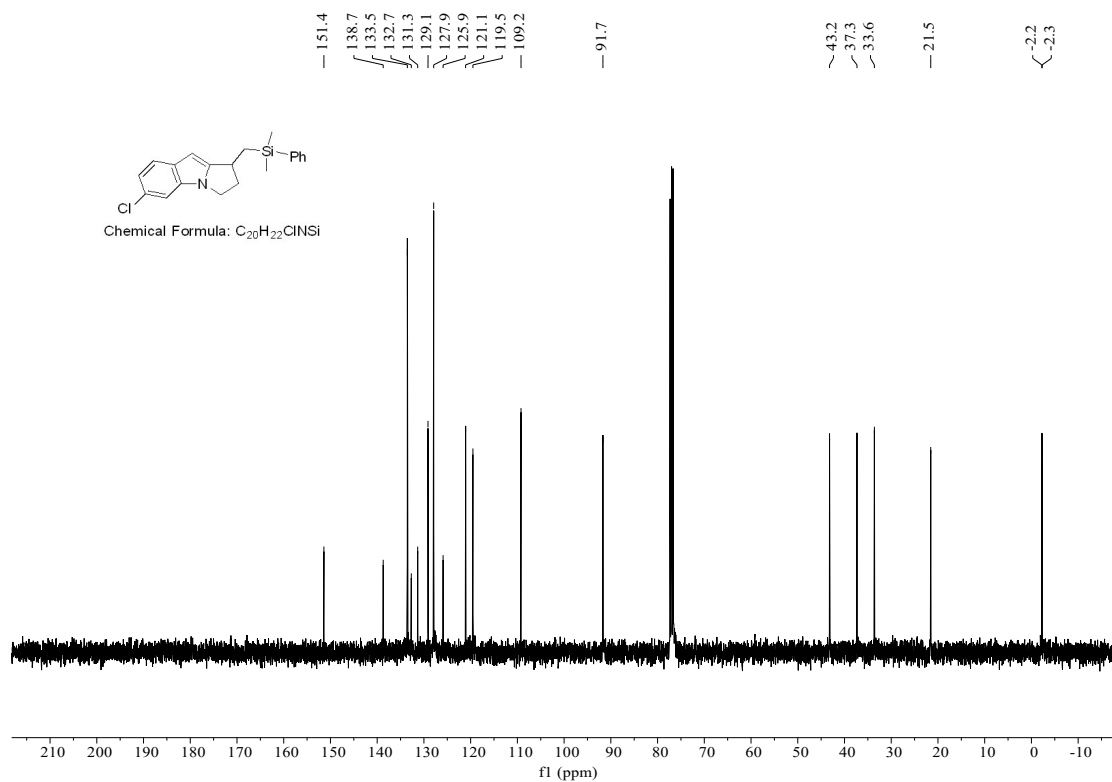

Fig. S15  $^1H$  NMR (400 MHz,  $CDCl_3$ ),  $^{13}C$  NMR (100 MHz,  $CDCl_3$ ) of **3ao**

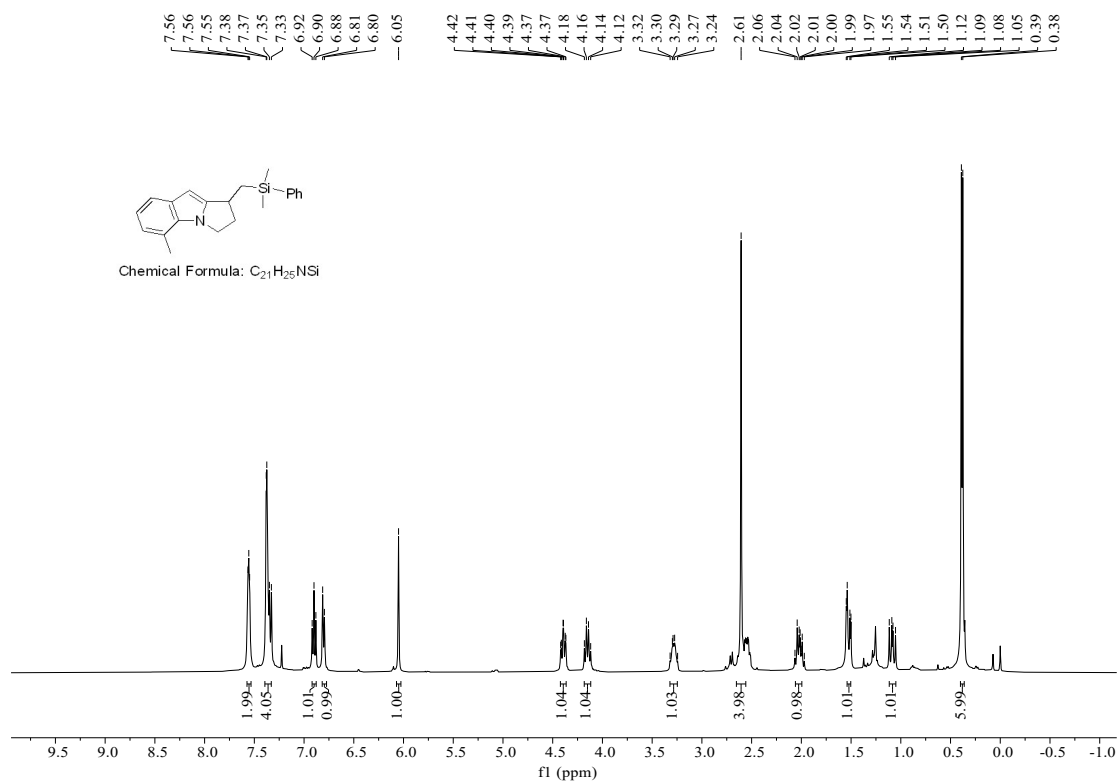

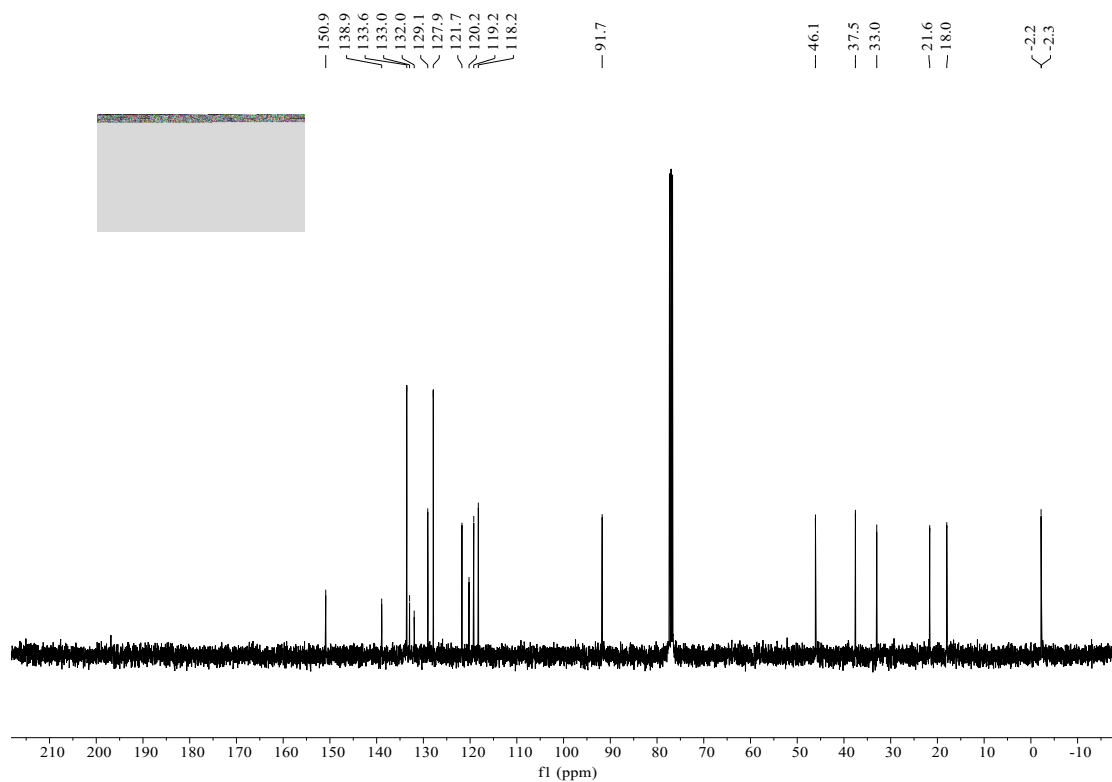

Fig. S16  $^1\text{H}$  NMR (400 MHz,  $\text{CDCl}_3$ ),  $^{13}\text{C}$  NMR (100 MHz,  $\text{CDCl}_3$ ) of **3ap**

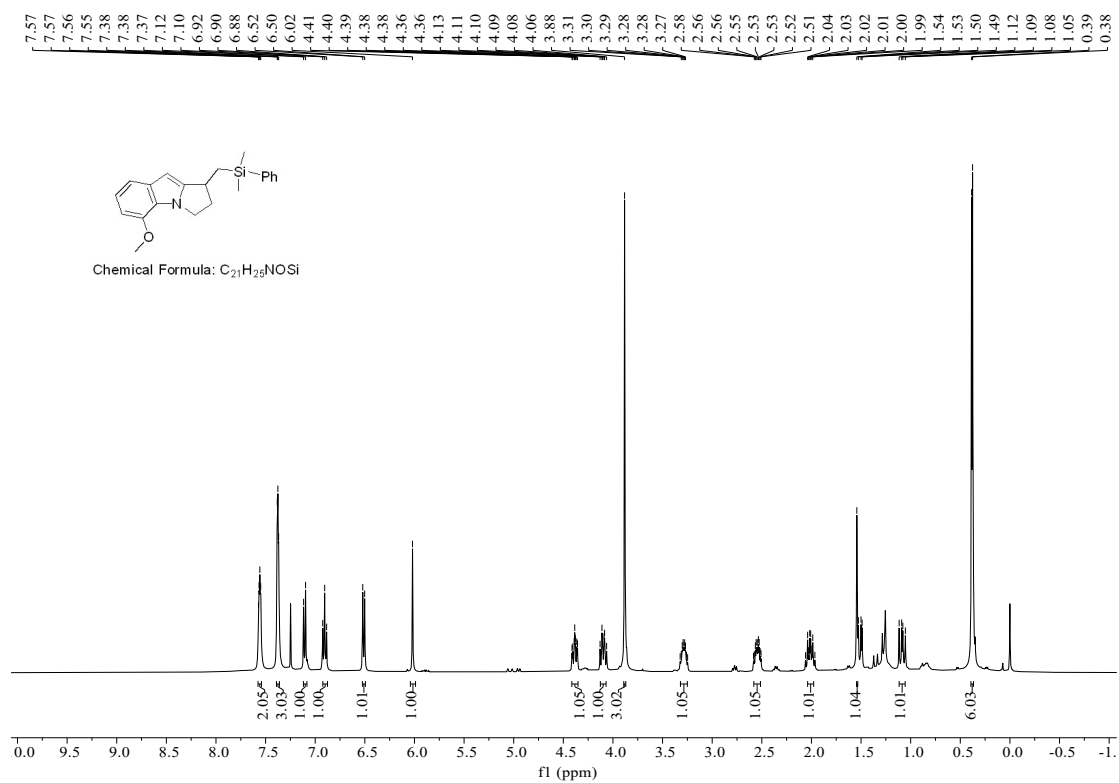

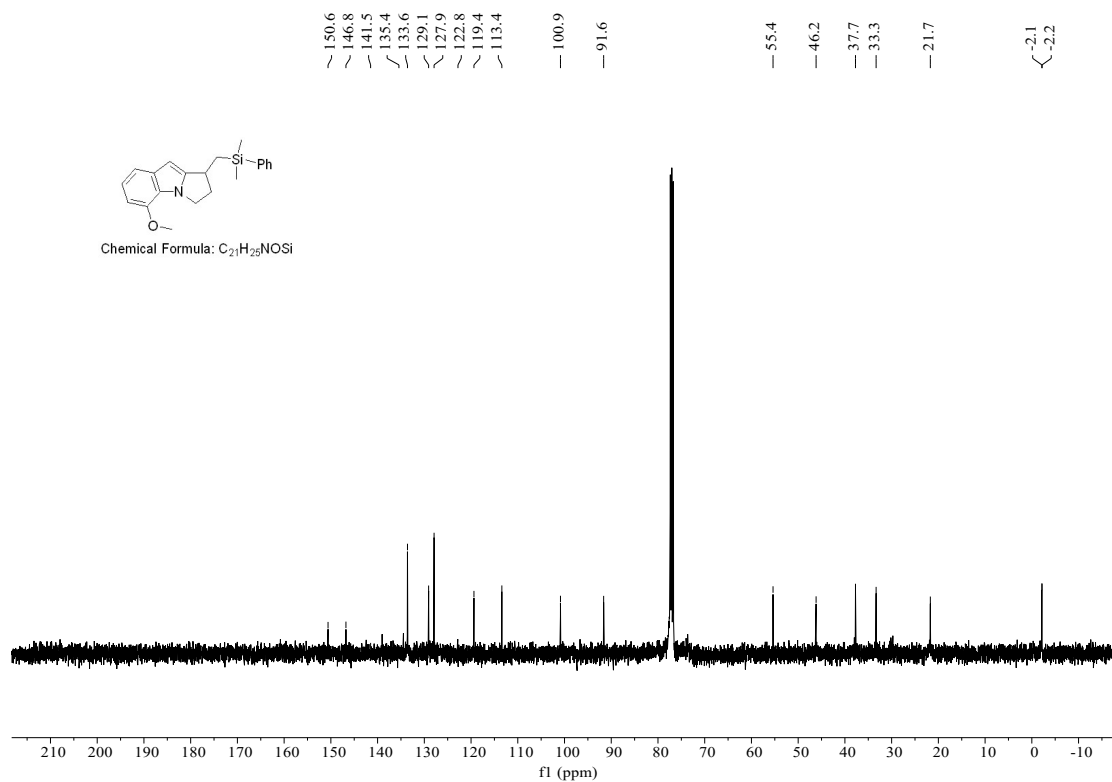

Fig. S17 <sup>1</sup>H NMR (400 MHz, CDCl<sub>3</sub>), <sup>13</sup>C NMR (100 MHz, CDCl<sub>3</sub>) of **3aq**

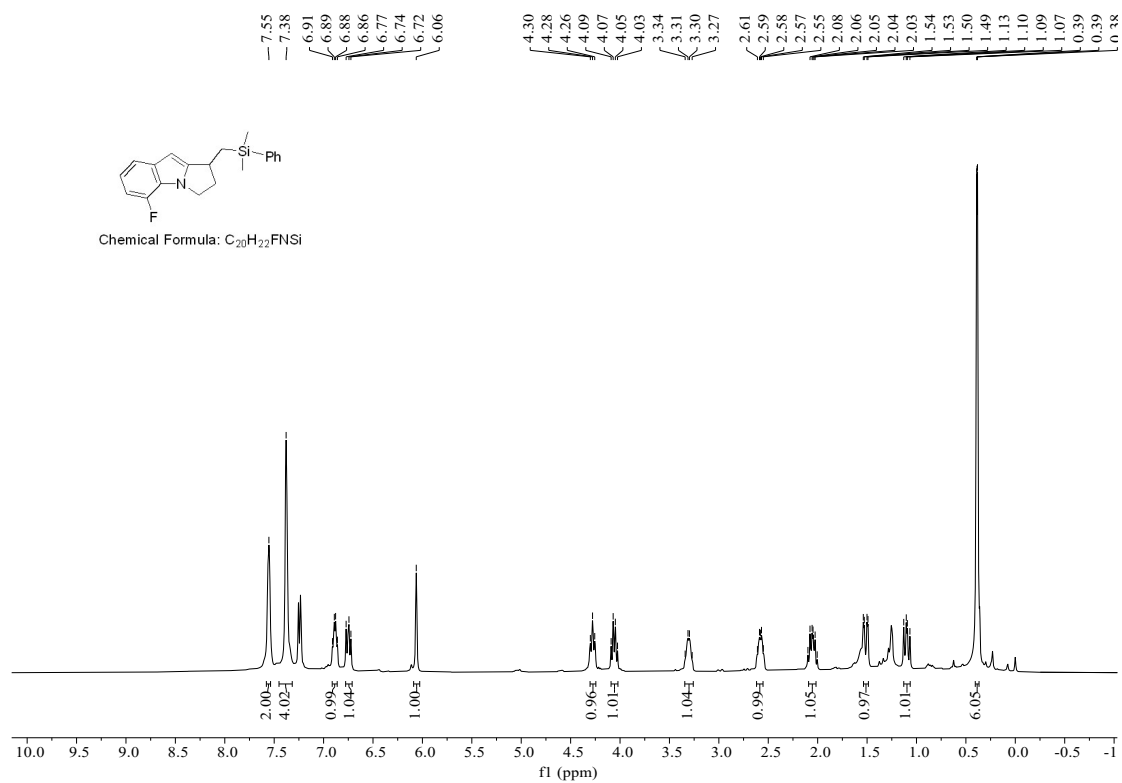



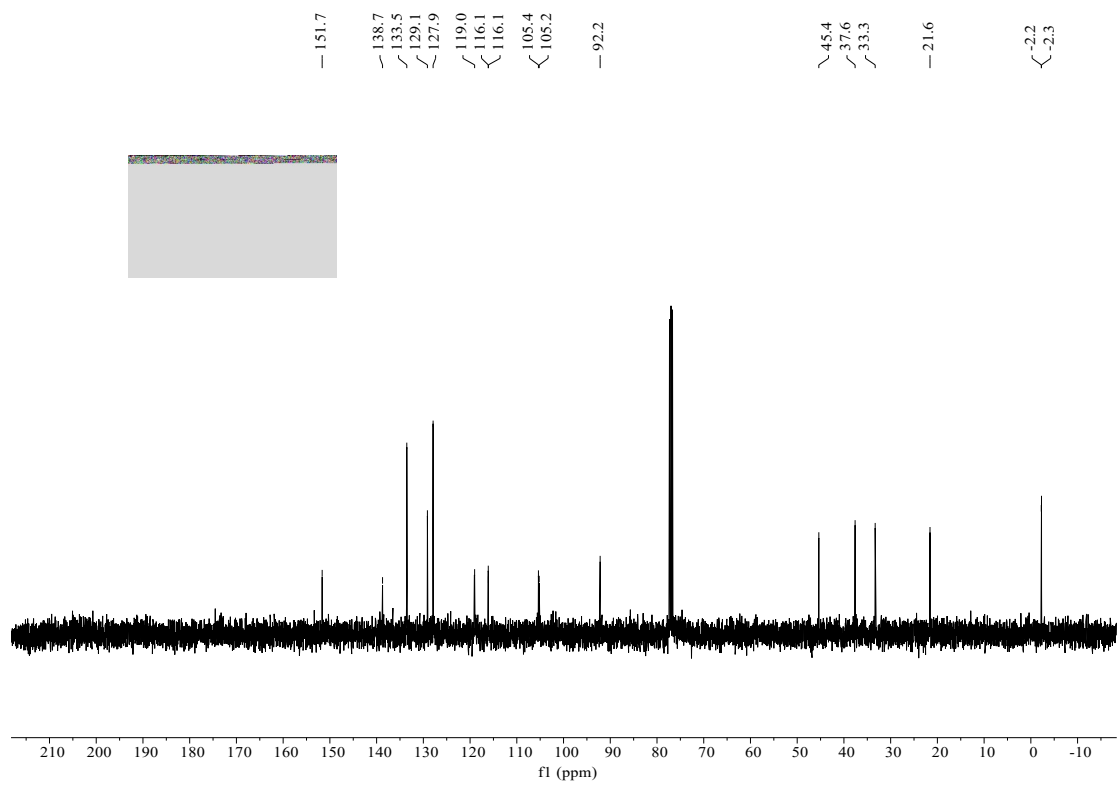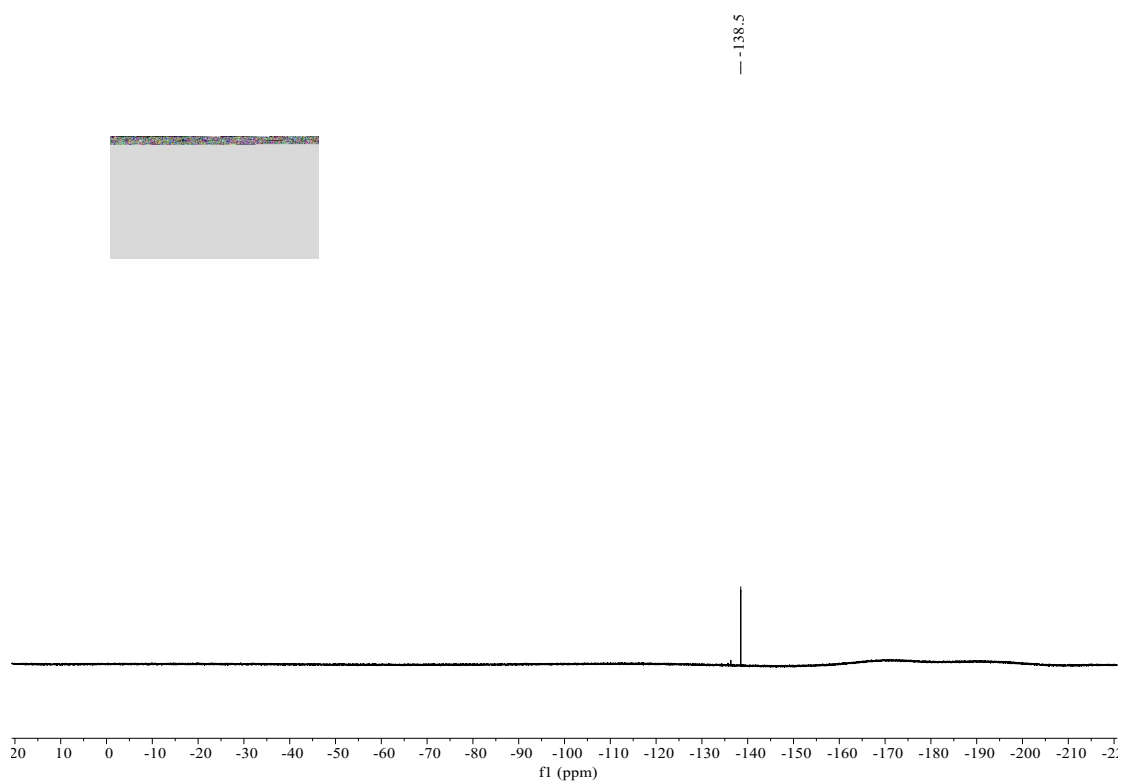

Fig. S18  $^1\text{H}$  NMR (400 MHz,  $\text{CDCl}_3$ ),  $^{13}\text{C}$  NMR (100 MHz,  $\text{CDCl}_3$ ),  $^{19}\text{F}$  NMR (376 MHz,  $\text{CDCl}_3$ ) of **3ar**

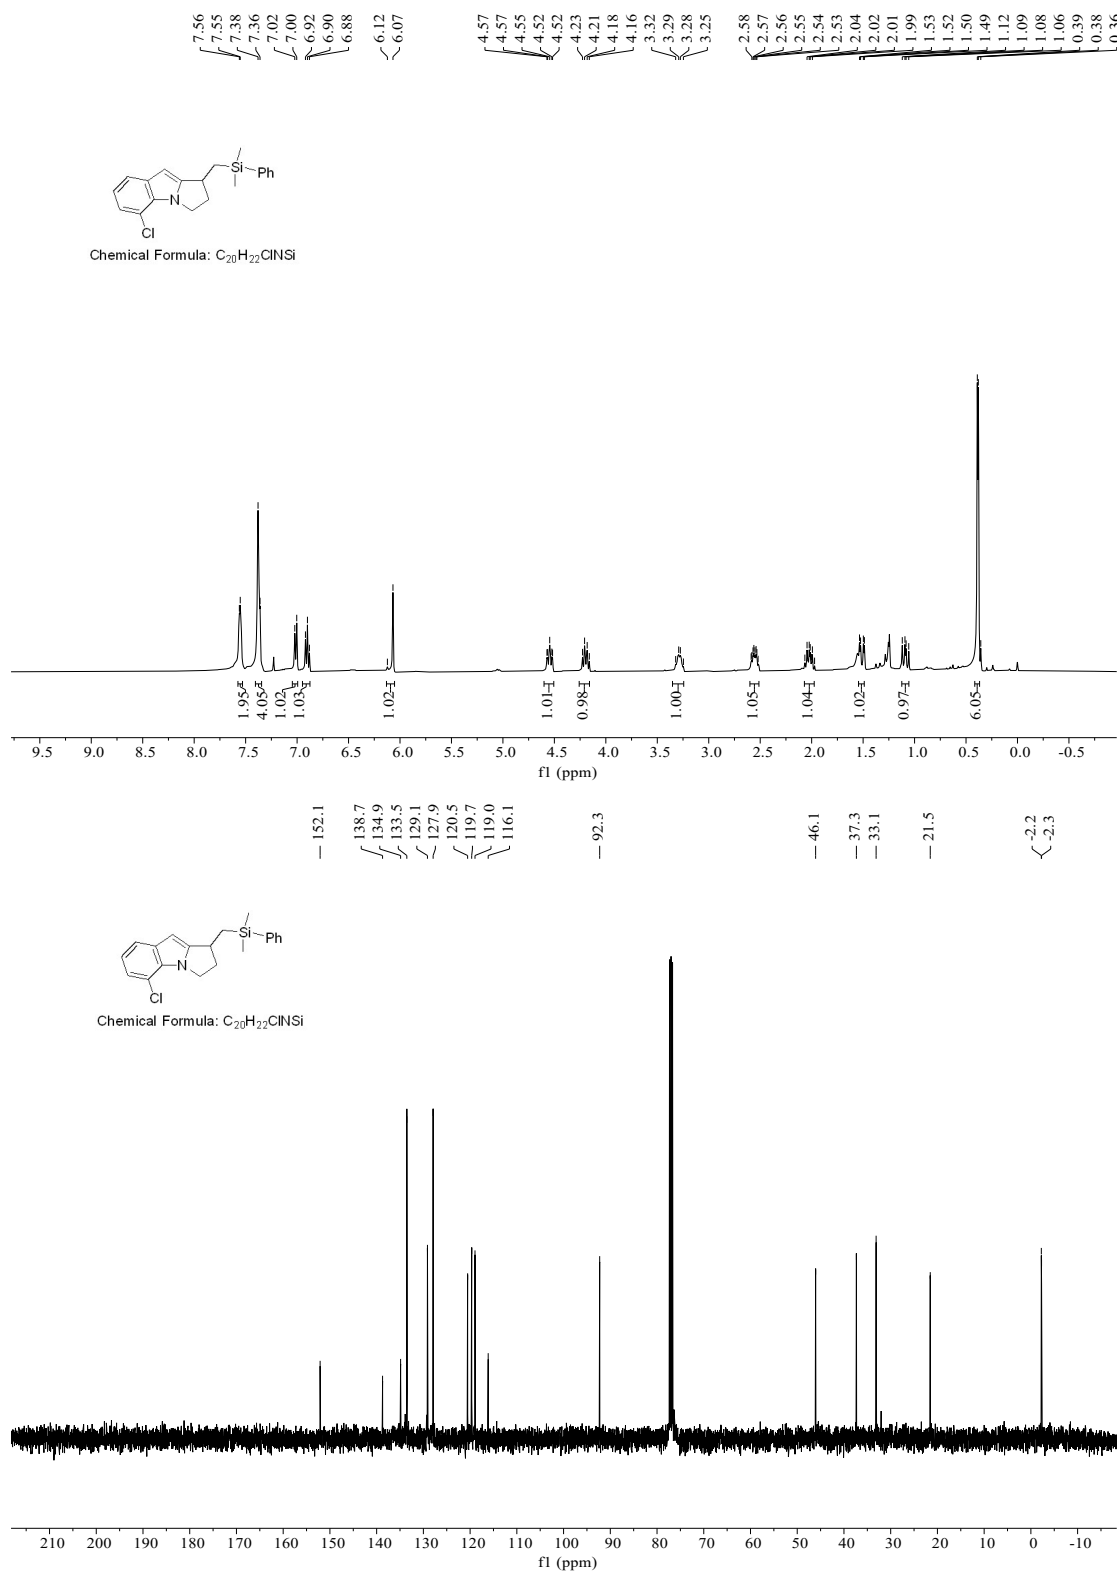

Fig. S19 <sup>1</sup>H NMR (400 MHz, CDCl<sub>3</sub>), <sup>13</sup>C NMR (100 MHz, CDCl<sub>3</sub>) of **3as**

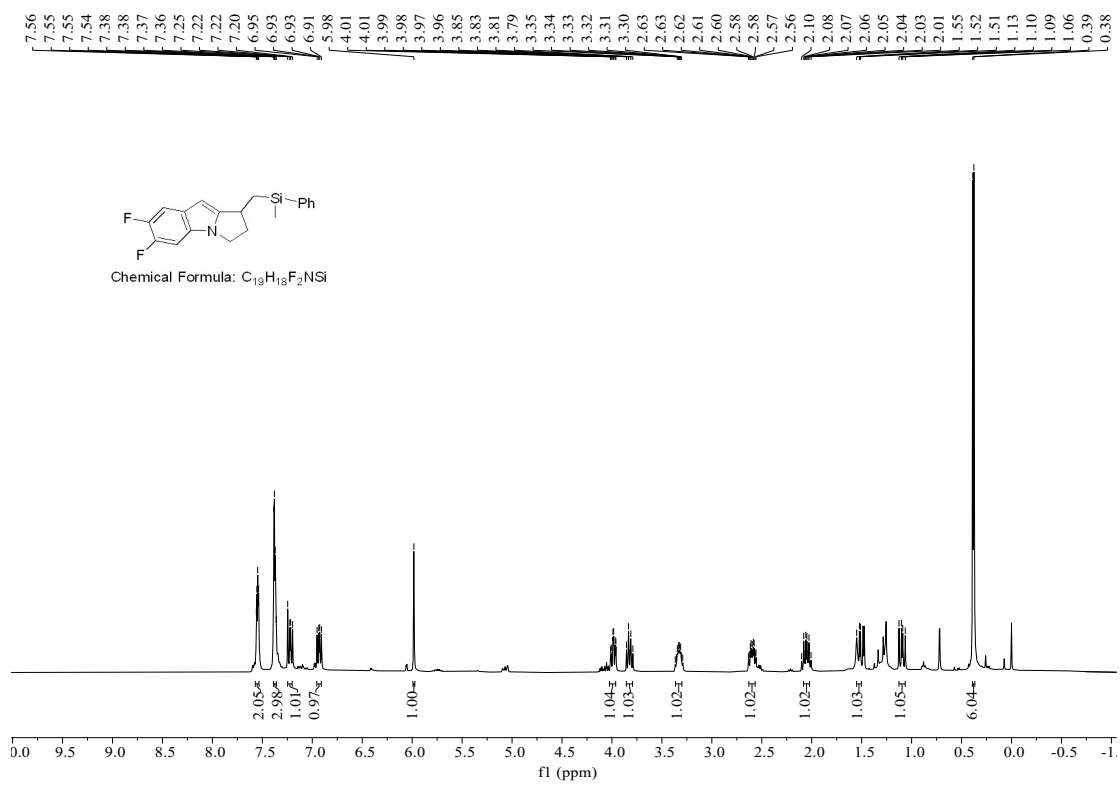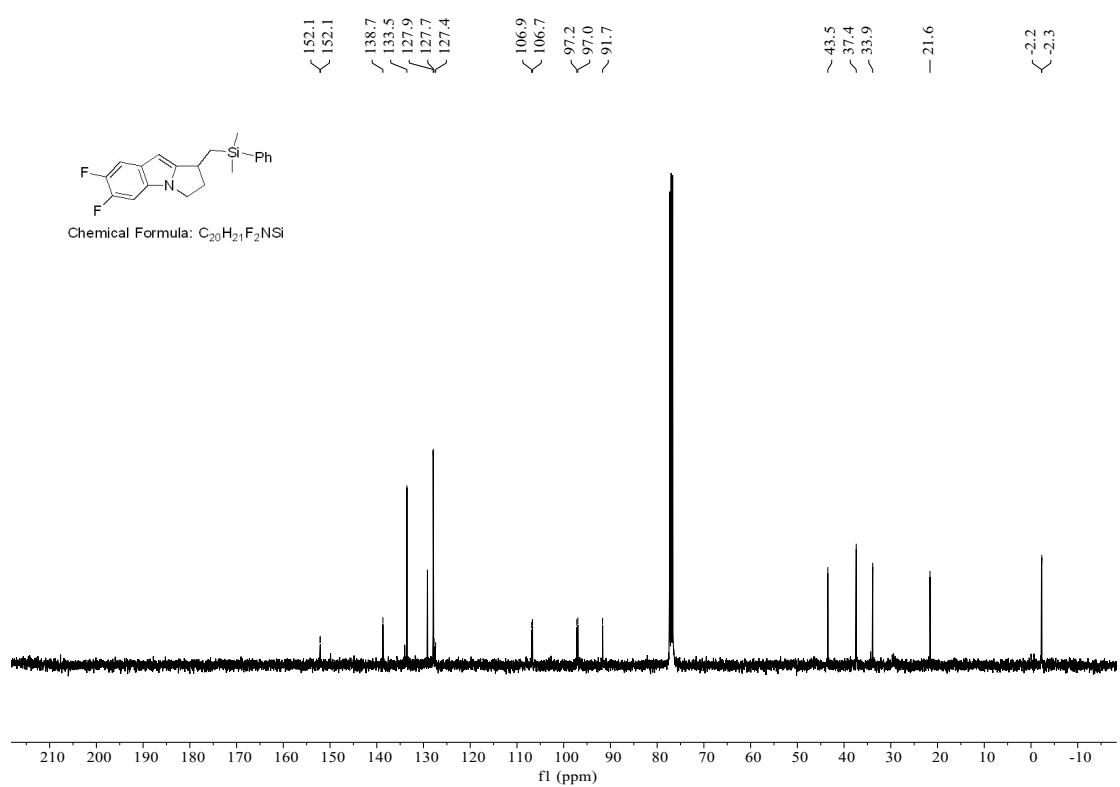

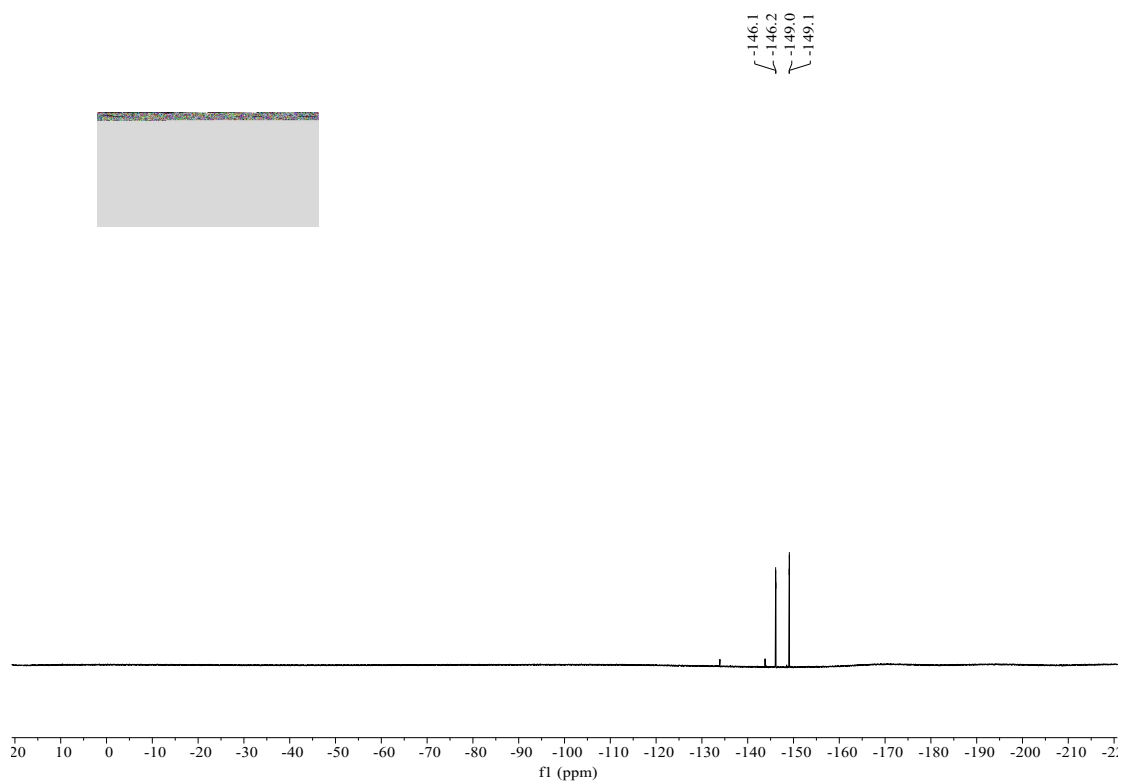

Fig. S20  $^1\text{H}$  NMR (400 MHz,  $\text{CDCl}_3$ ),  $^{13}\text{C}$  NMR (100 MHz,  $\text{CDCl}_3$ ),  $^{19}\text{F}$  NMR (376 MHz,  $\text{CDCl}_3$ ) of **3at**

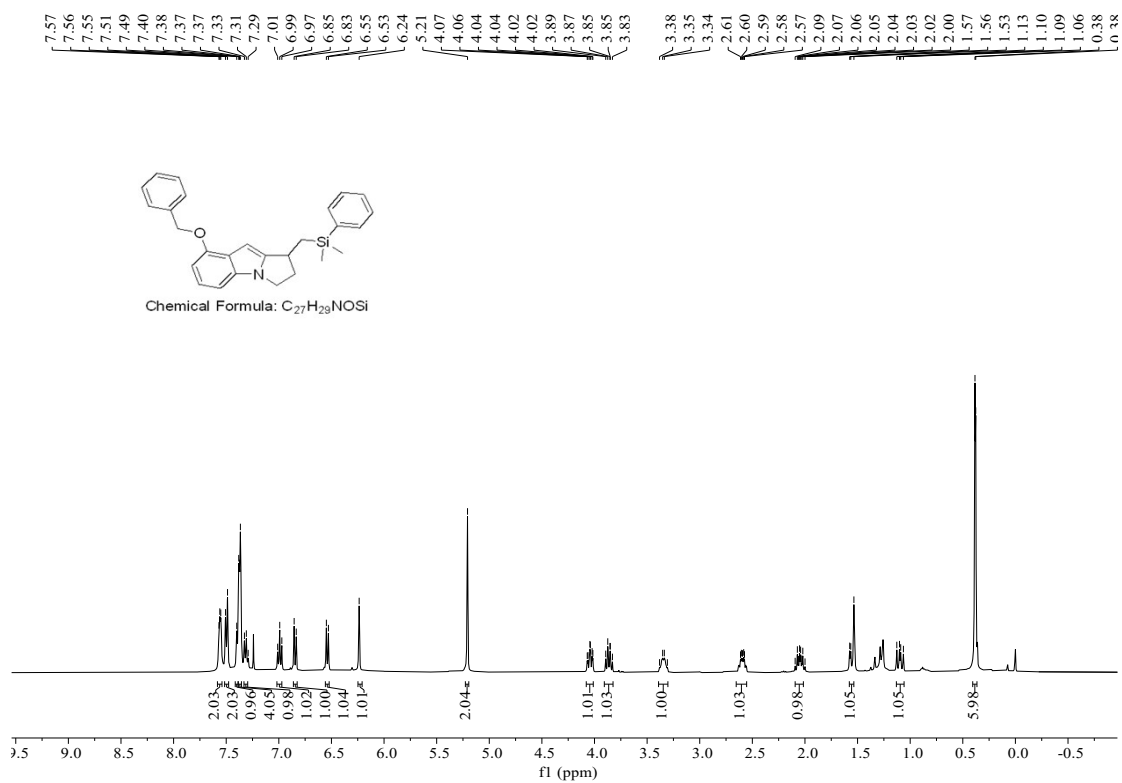

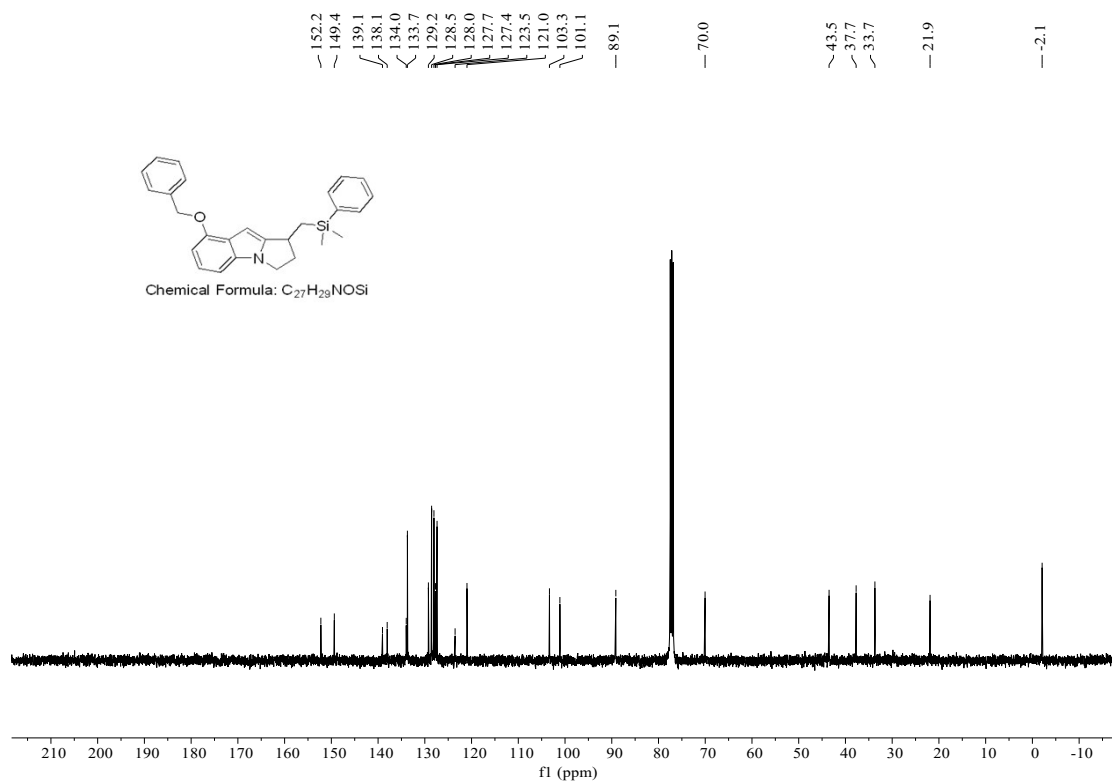

Fig. S21  $^1H$  NMR (400 MHz,  $CDCl_3$ ),  $^{13}C$  NMR (100 MHz,  $CDCl_3$ ) of **3au**

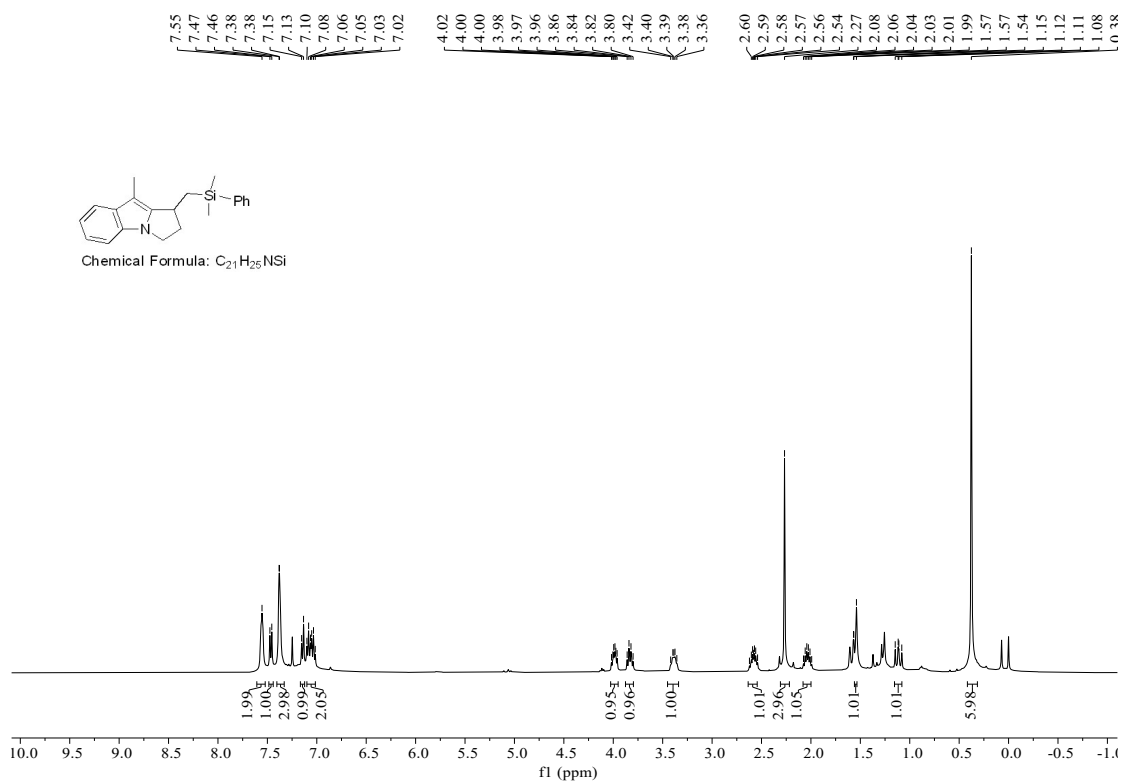

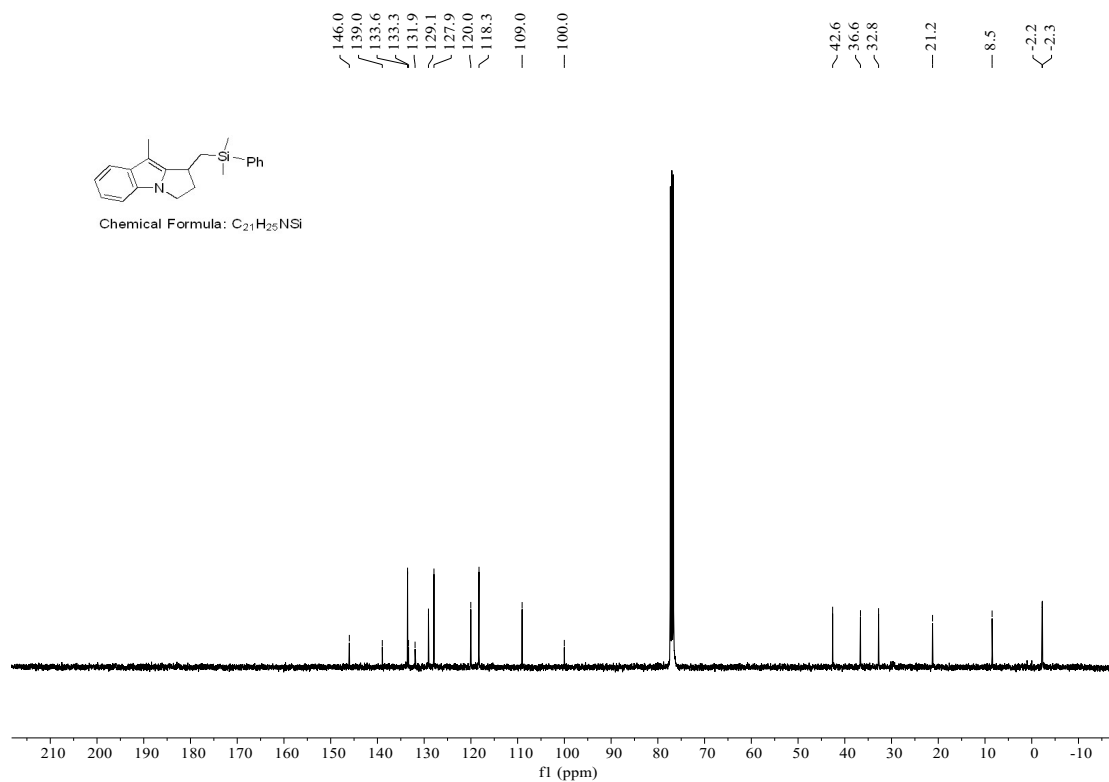

Fig. S22 <sup>1</sup>H NMR (400 MHz, CDCl<sub>3</sub>), <sup>13</sup>C NMR (100 MHz, CDCl<sub>3</sub>) of **3av**

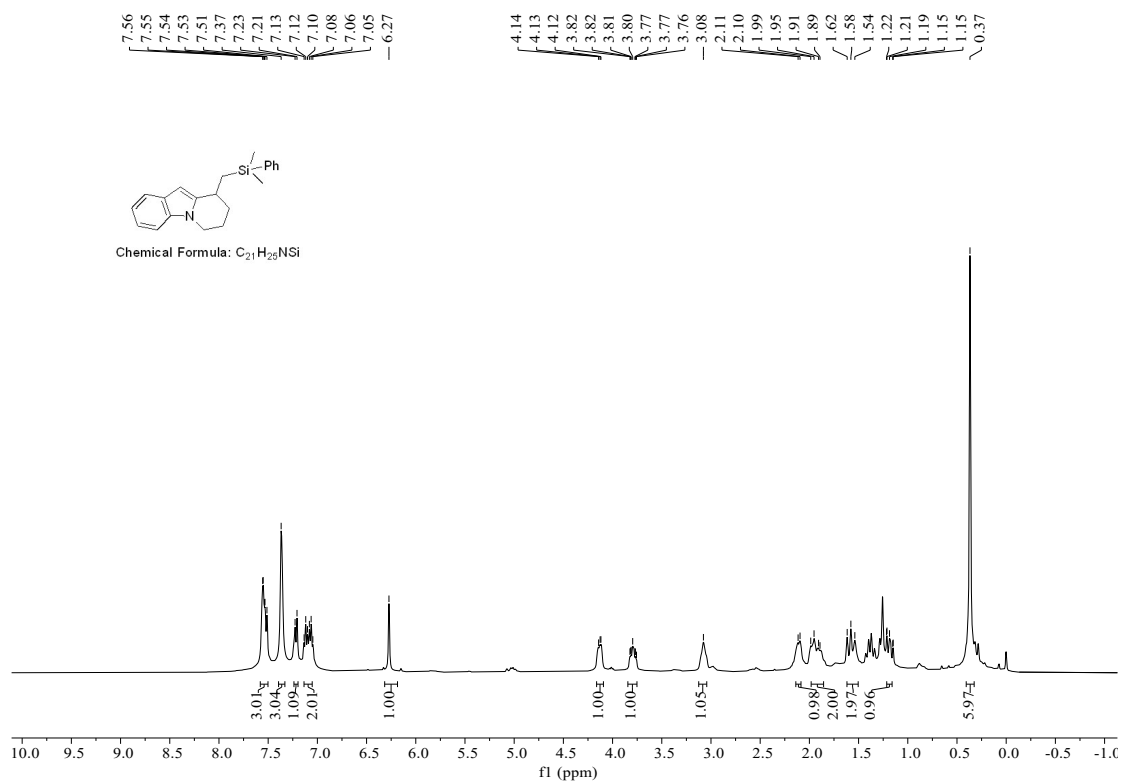

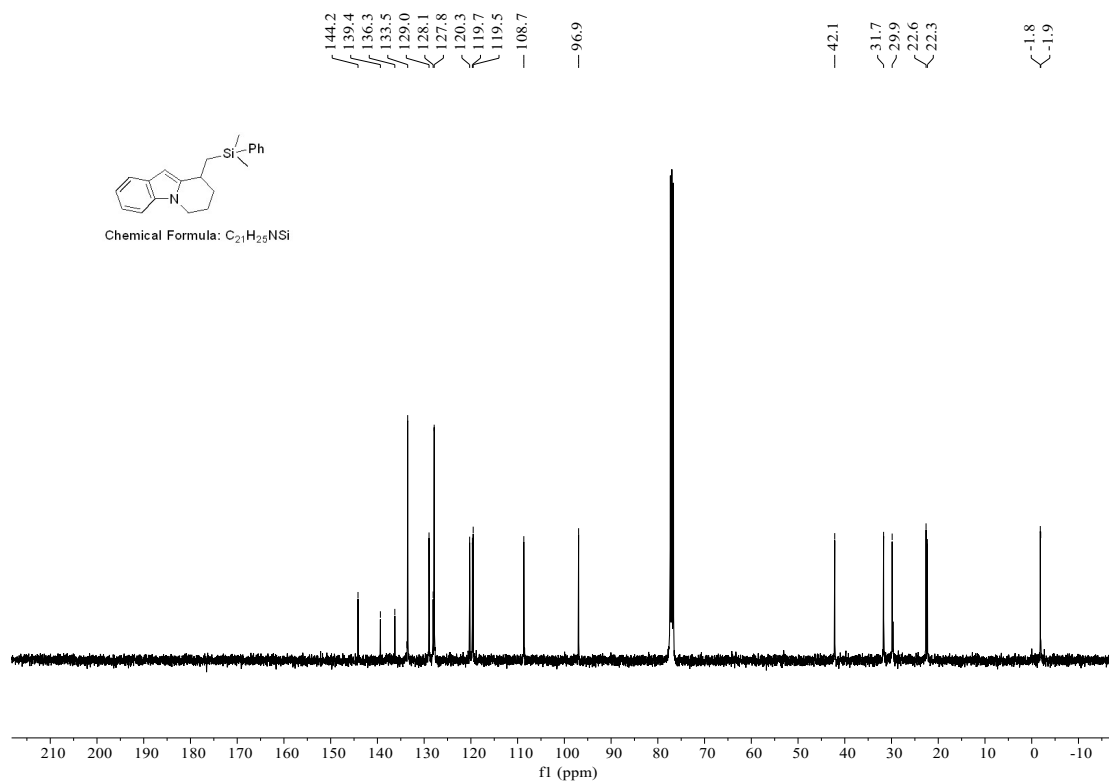

Fig. S23  $^1H$  NMR (400 MHz,  $CDCl_3$ ),  $^{13}C$  NMR (100 MHz,  $CDCl_3$ ) of **3aw**

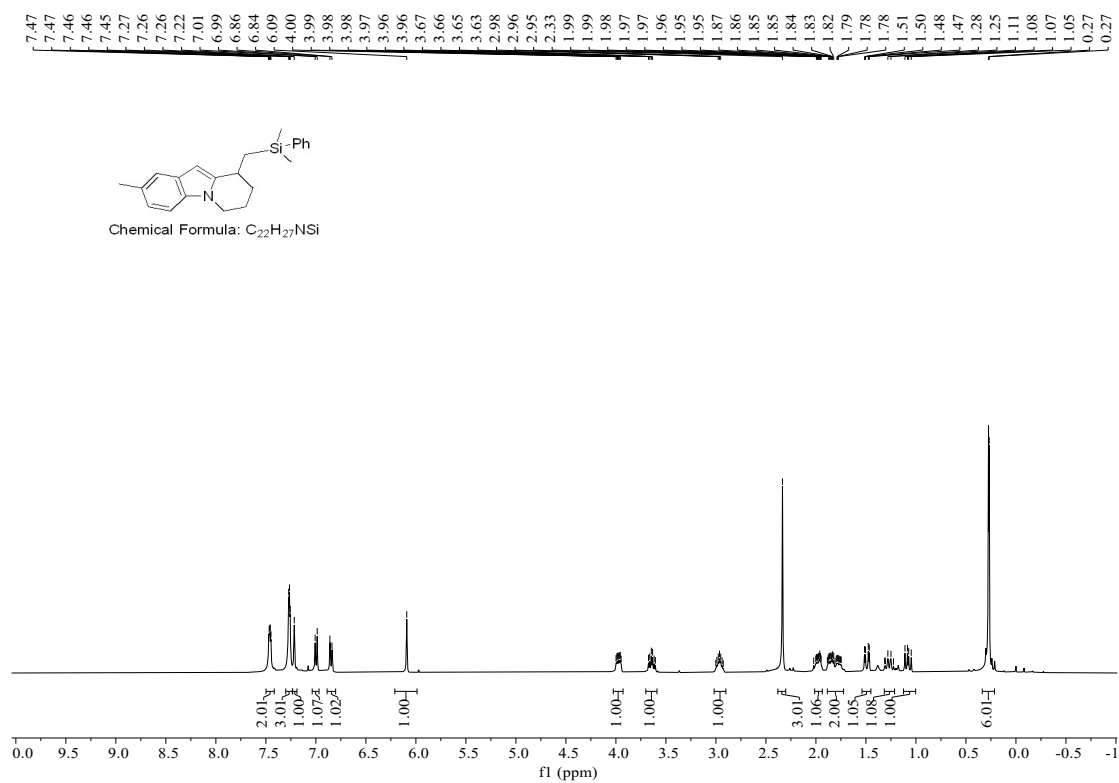

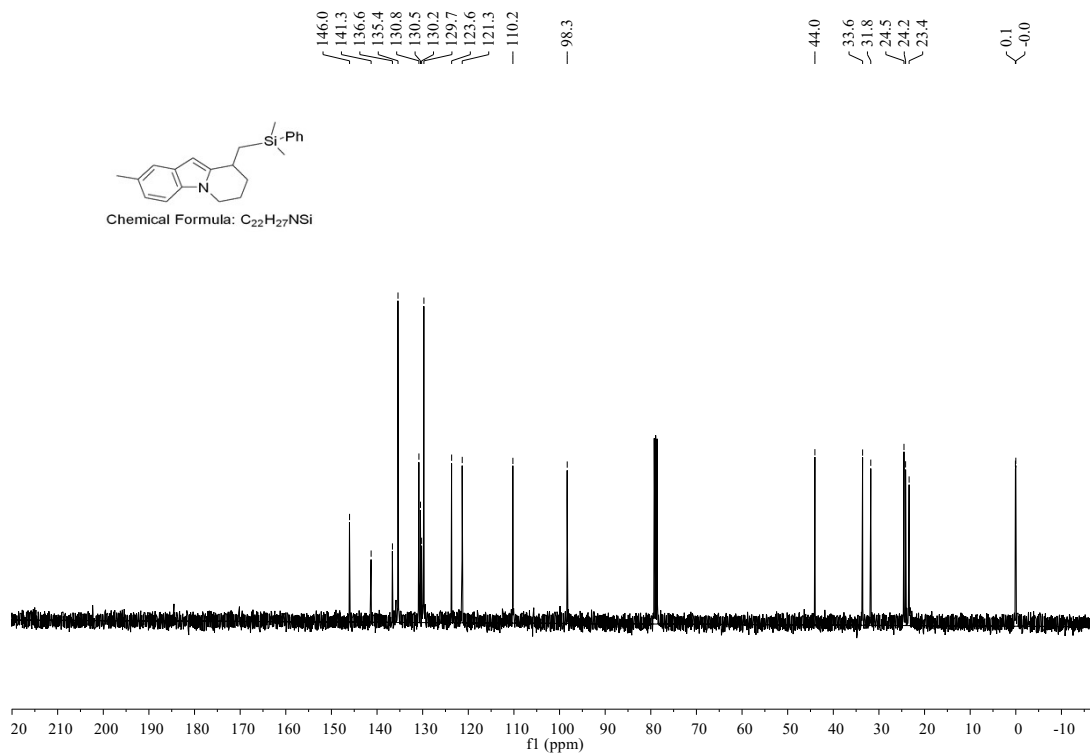

Fig. S24  $^1H$  NMR (400 MHz,  $CDCl_3$ ),  $^{13}C$  NMR (100 MHz,  $CDCl_3$ ) of **3ax**

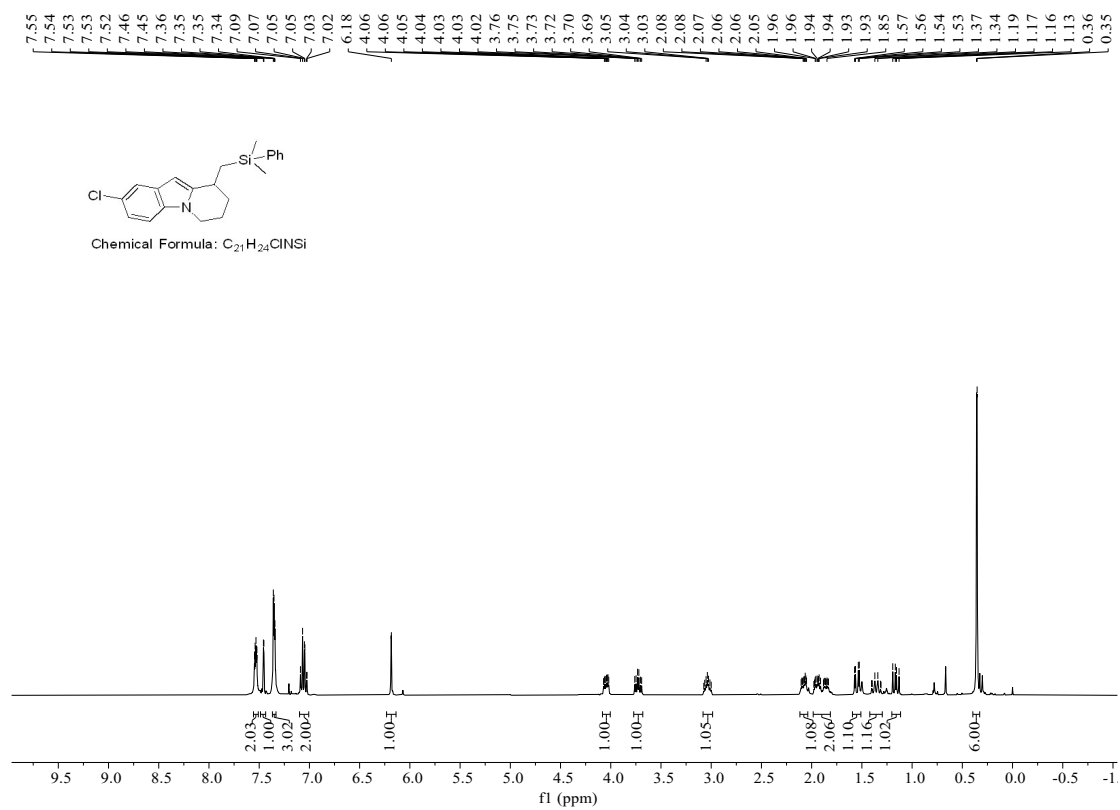



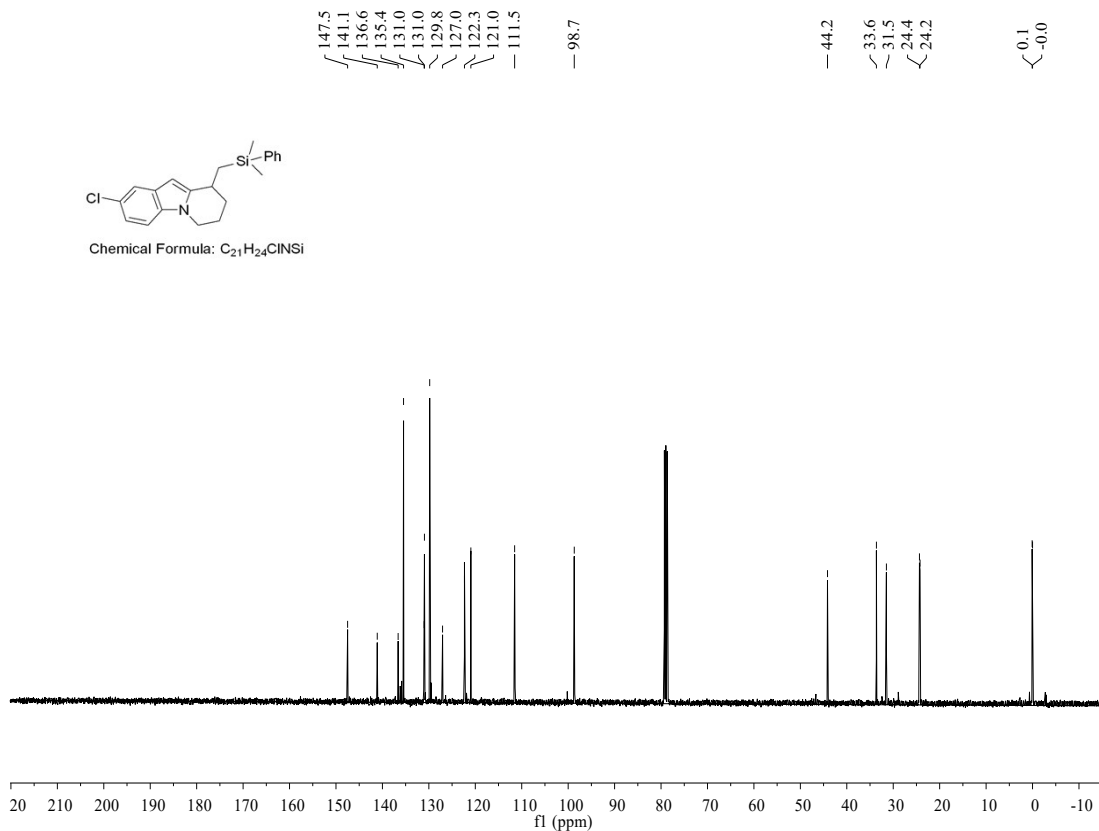

Fig. S25  $^1H$  NMR (400 MHz,  $CDCl_3$ ),  $^{13}C$  NMR (100 MHz,  $CDCl_3$ ) of **3ay**

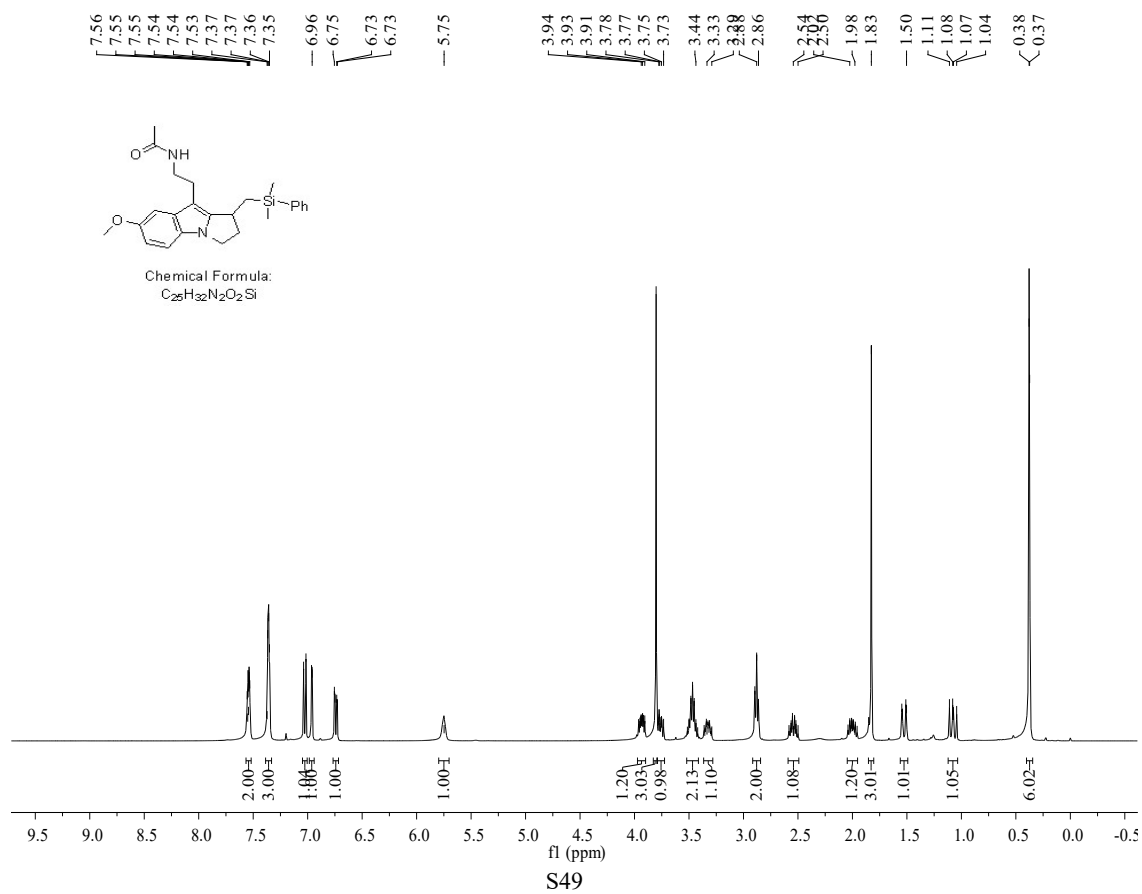

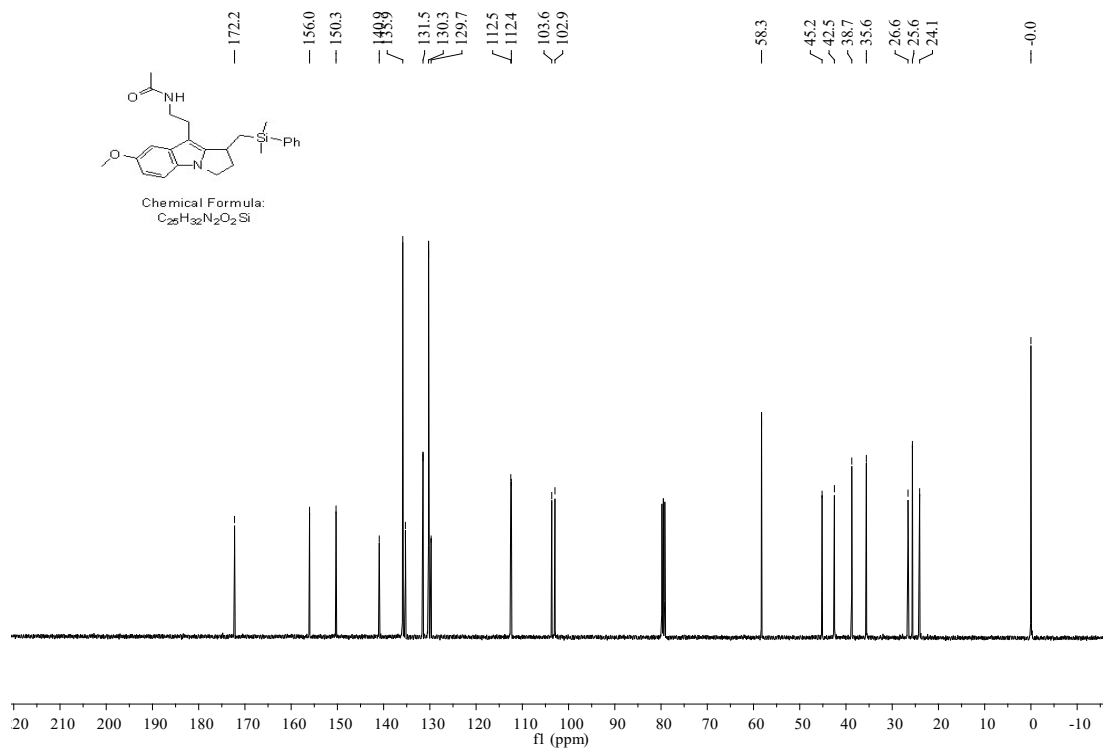

Fig. S26  $^1H$  NMR (400 MHz,  $CDCl_3$ ),  $^{13}C$  NMR (100 MHz,  $CDCl_3$ ) of **3az**

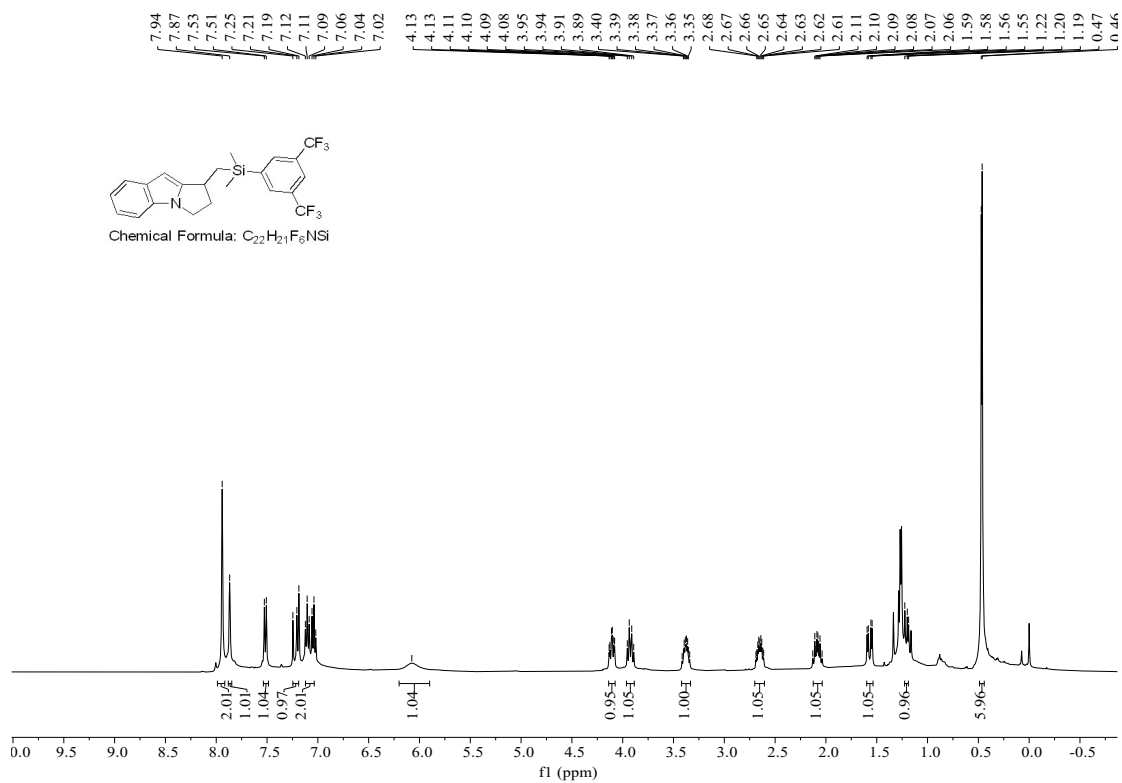

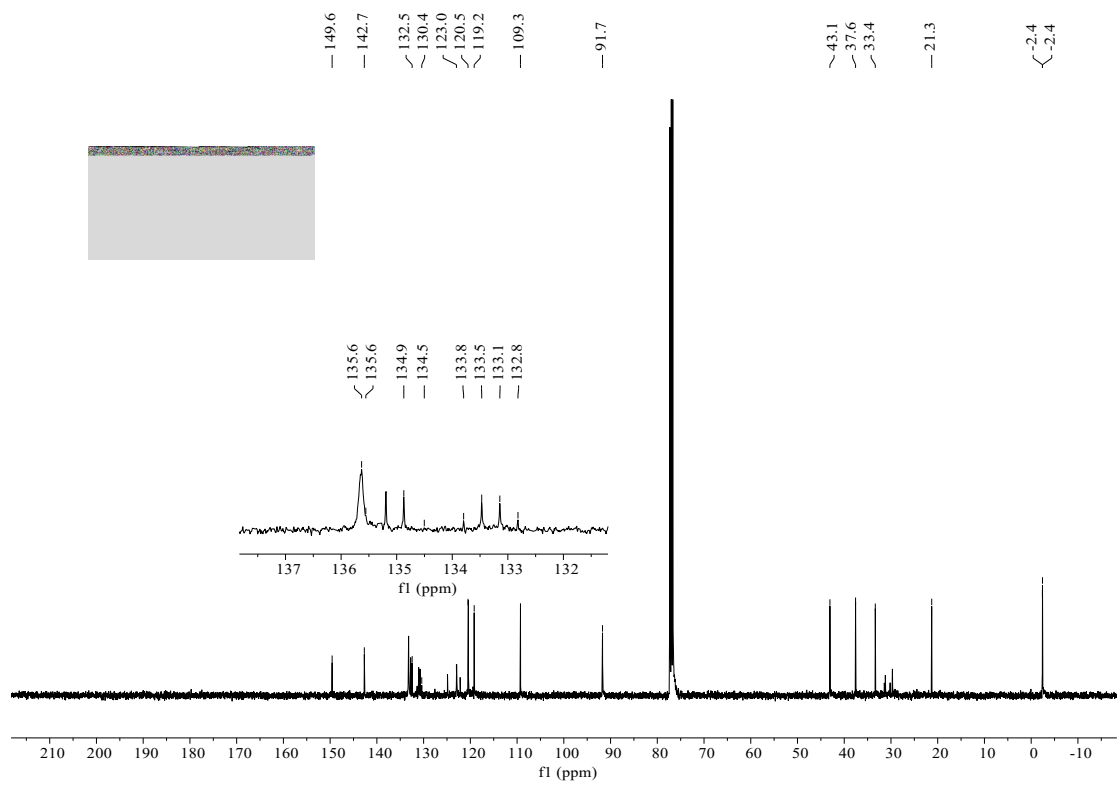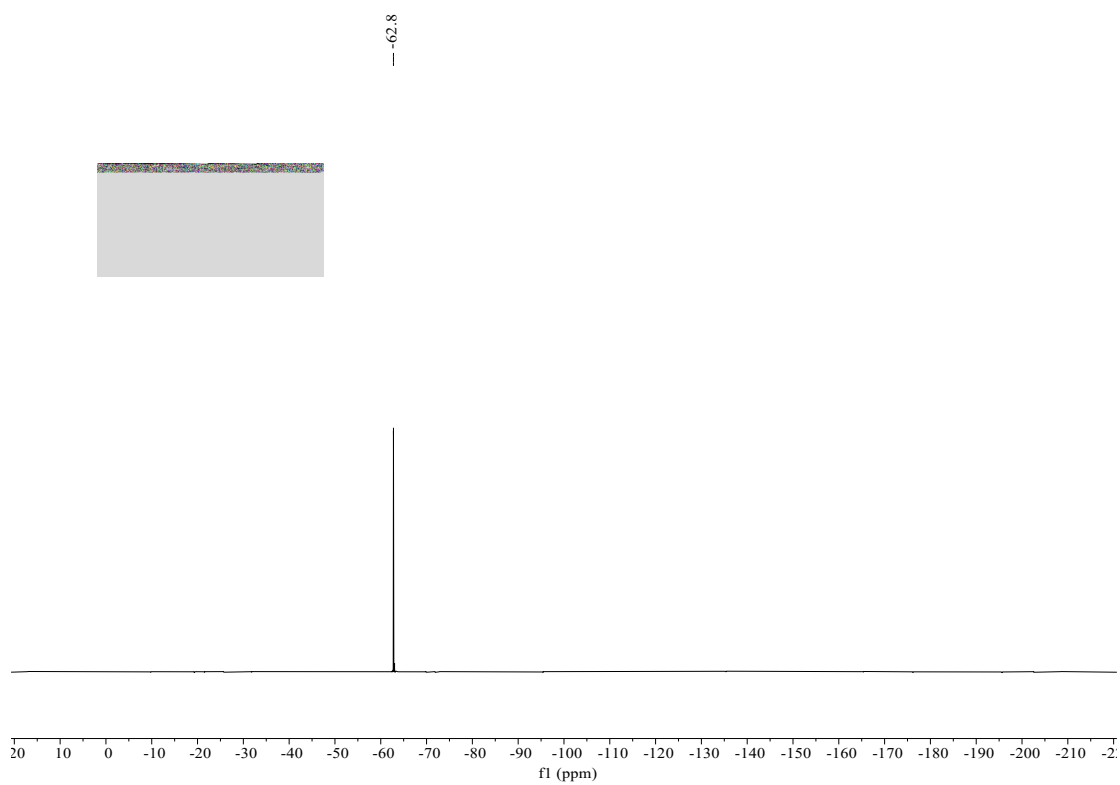

Fig. S27 <sup>1</sup>H NMR (400 MHz, CDCl<sub>3</sub>), <sup>13</sup>C NMR (100 MHz, CDCl<sub>3</sub>), <sup>19</sup>F NMR (376 MHz, CDCl<sub>3</sub>) of **3ba**

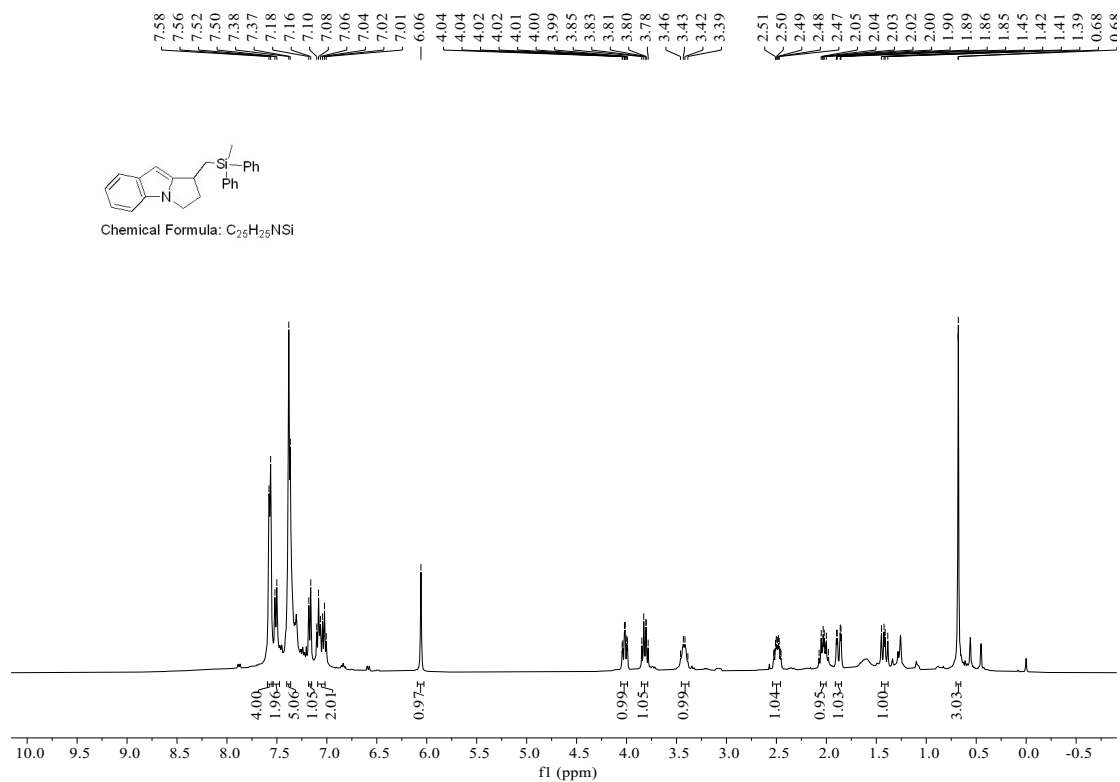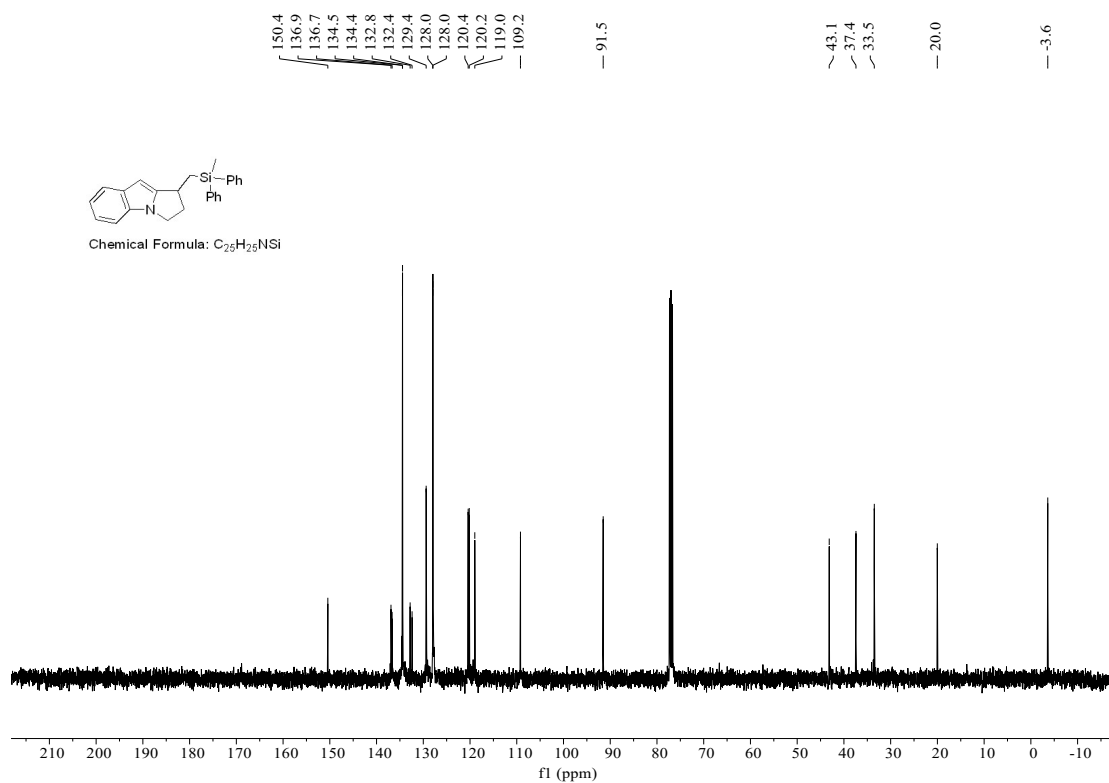

Fig. S28  $^1H$  NMR (400 MHz,  $CDCl_3$ ),  $^{13}C$  NMR (100 MHz,  $CDCl_3$ ) of **3bb**

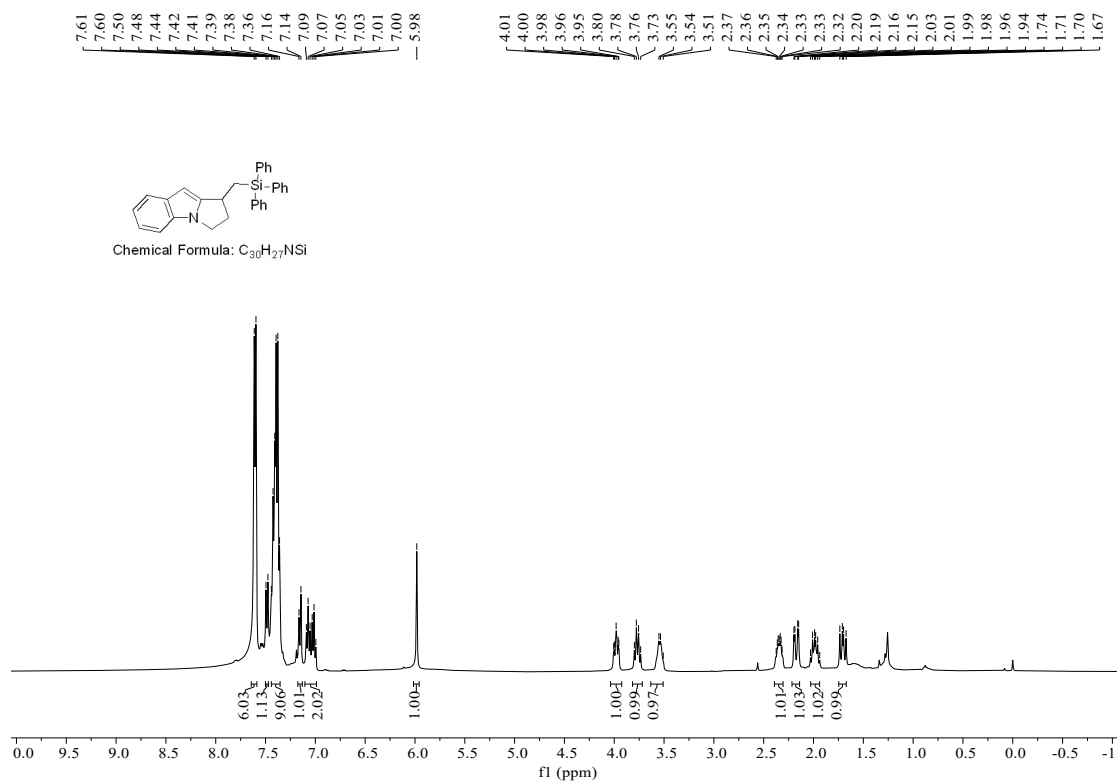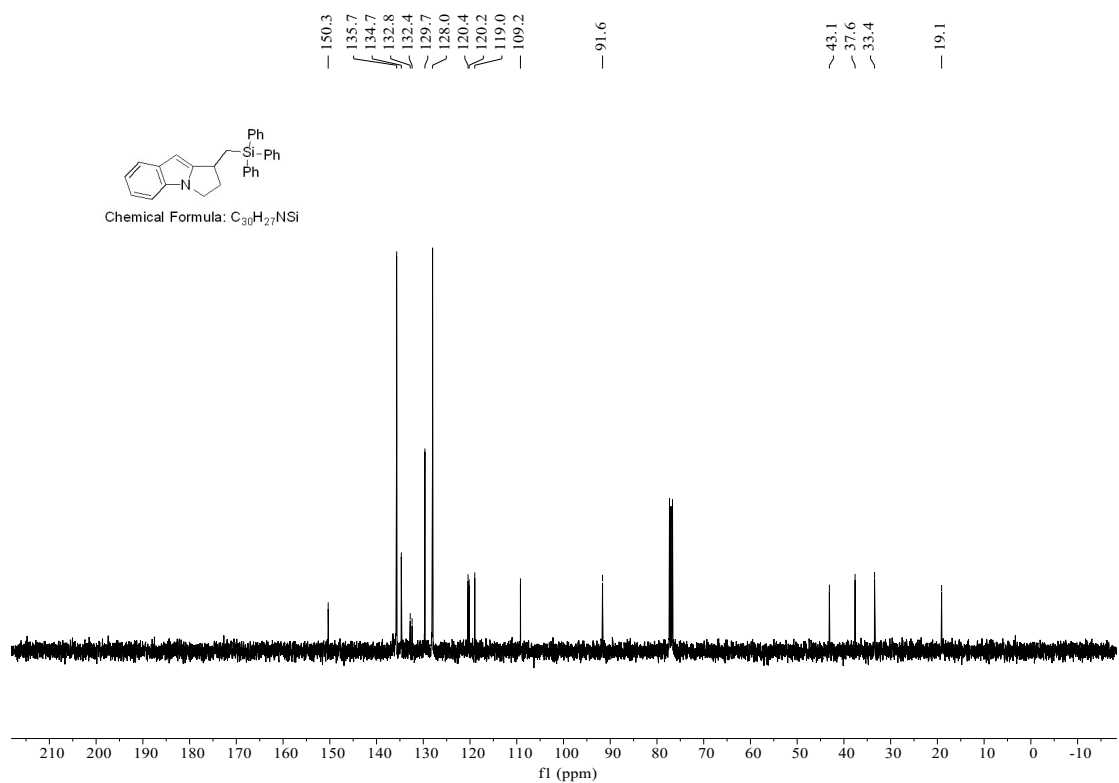

Fig. S29  $^1H$  NMR (400 MHz,  $CDCl_3$ ),  $^{13}C$  NMR (100 MHz,  $CDCl_3$ ) of **3bc**

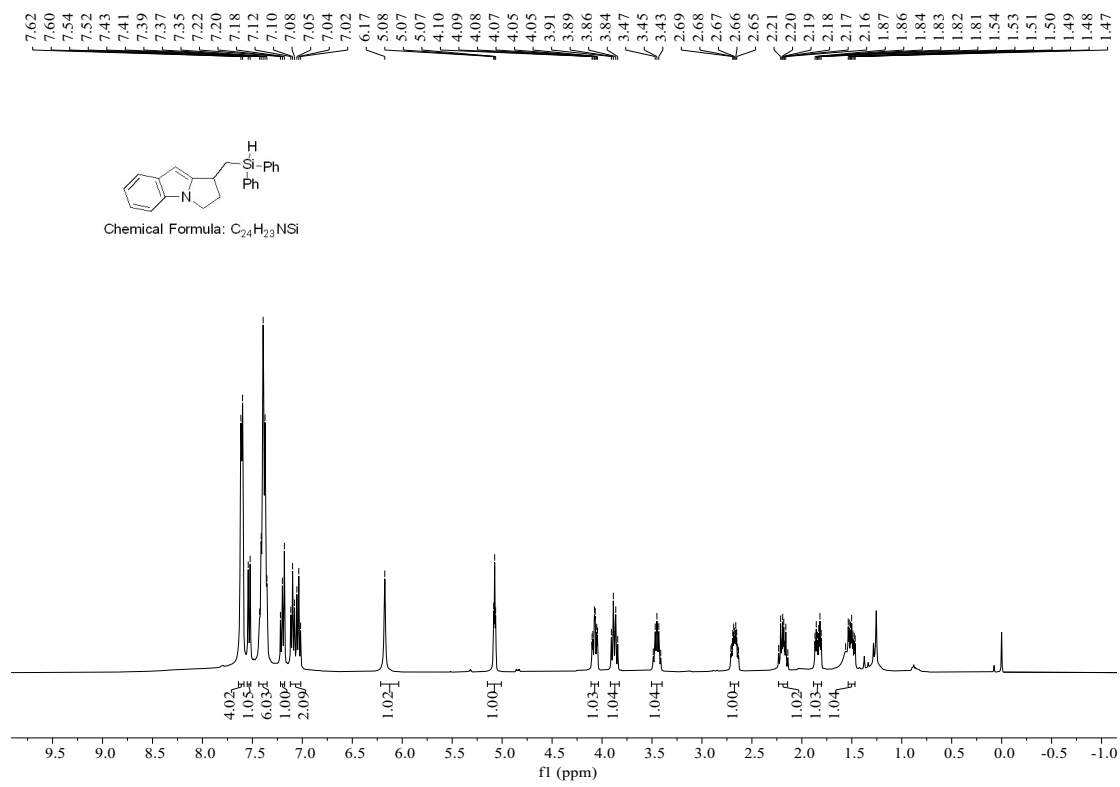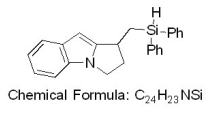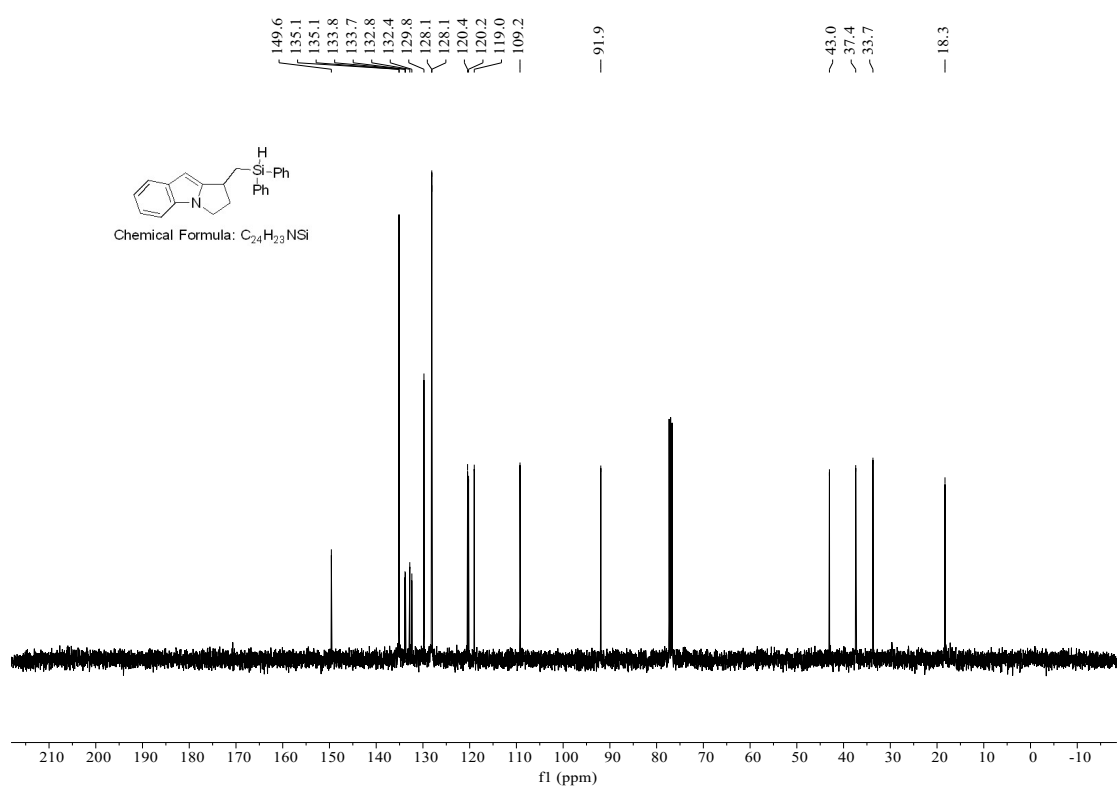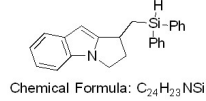

Fig. S30  $^1H$  NMR (400 MHz,  $CDCl_3$ ),  $^{13}C$  NMR (100 MHz,  $CDCl_3$ ) of **3bd**

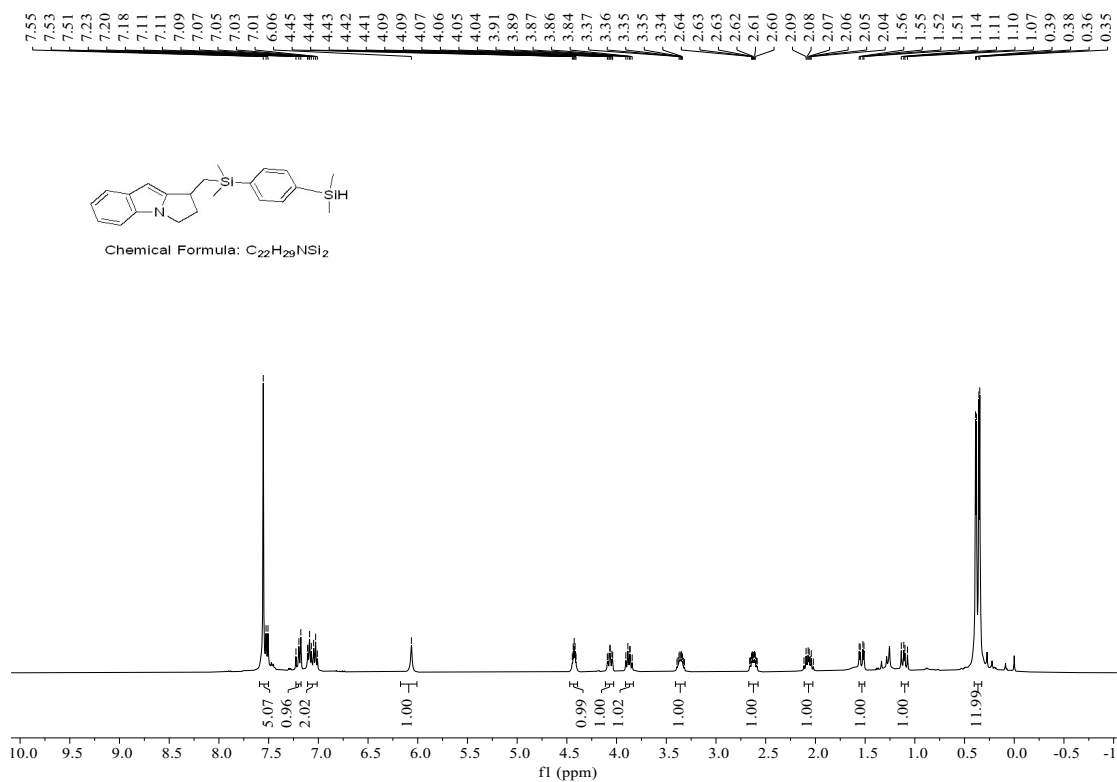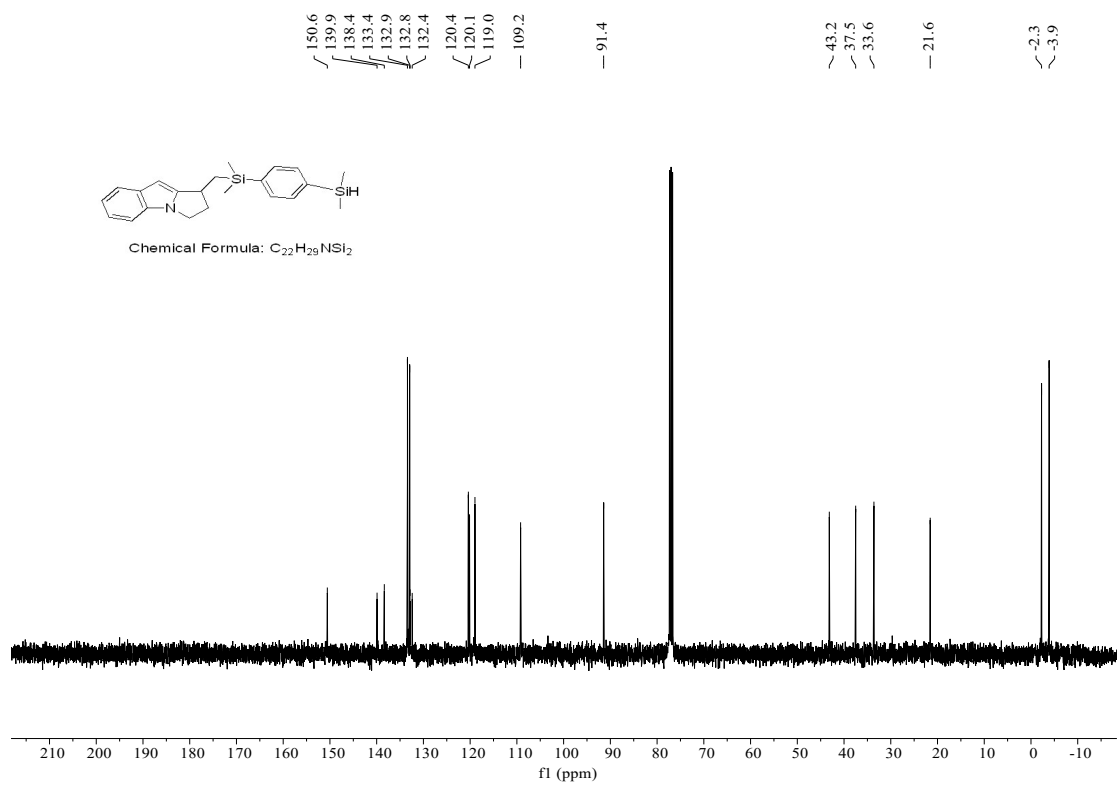

Fig. S31  $^1H$  NMR (400 MHz,  $CDCl_3$ ),  $^{13}C$  NMR (100 MHz,  $CDCl_3$ ) of **3be**

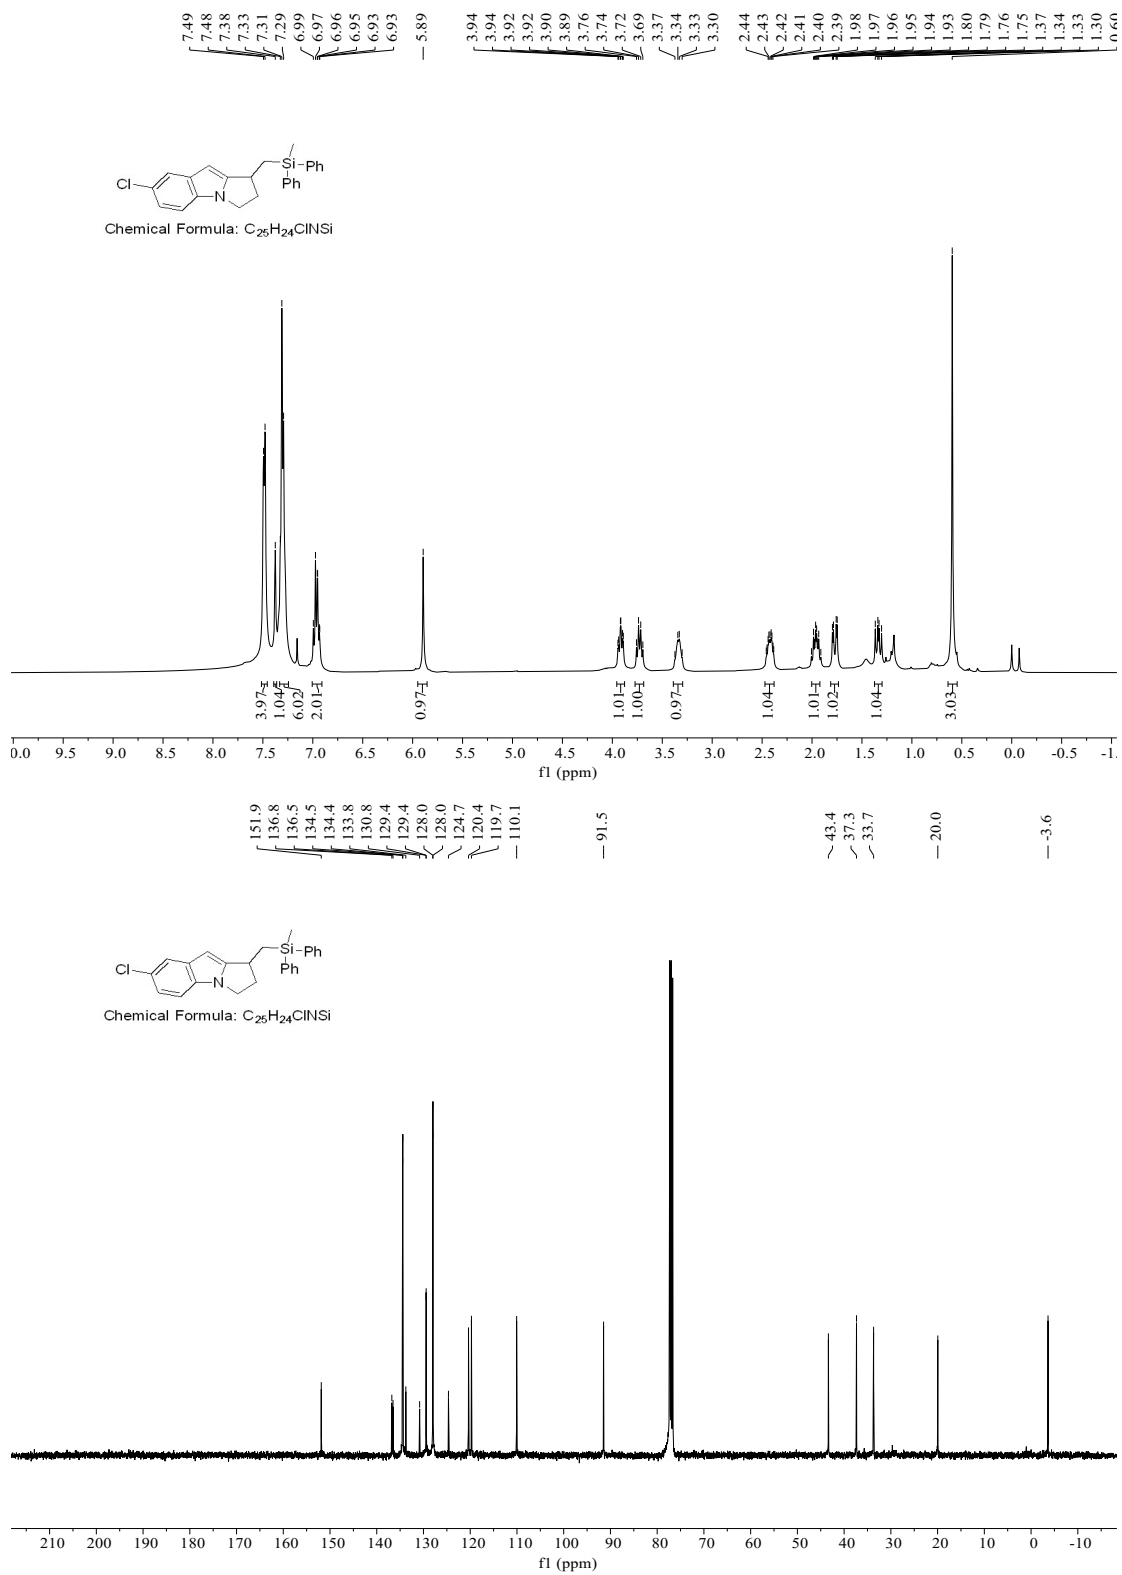

Fig. S32 <sup>1</sup>H NMR (400 MHz, CDCl<sub>3</sub>), <sup>13</sup>C NMR (100 MHz, CDCl<sub>3</sub>) of **3bf**



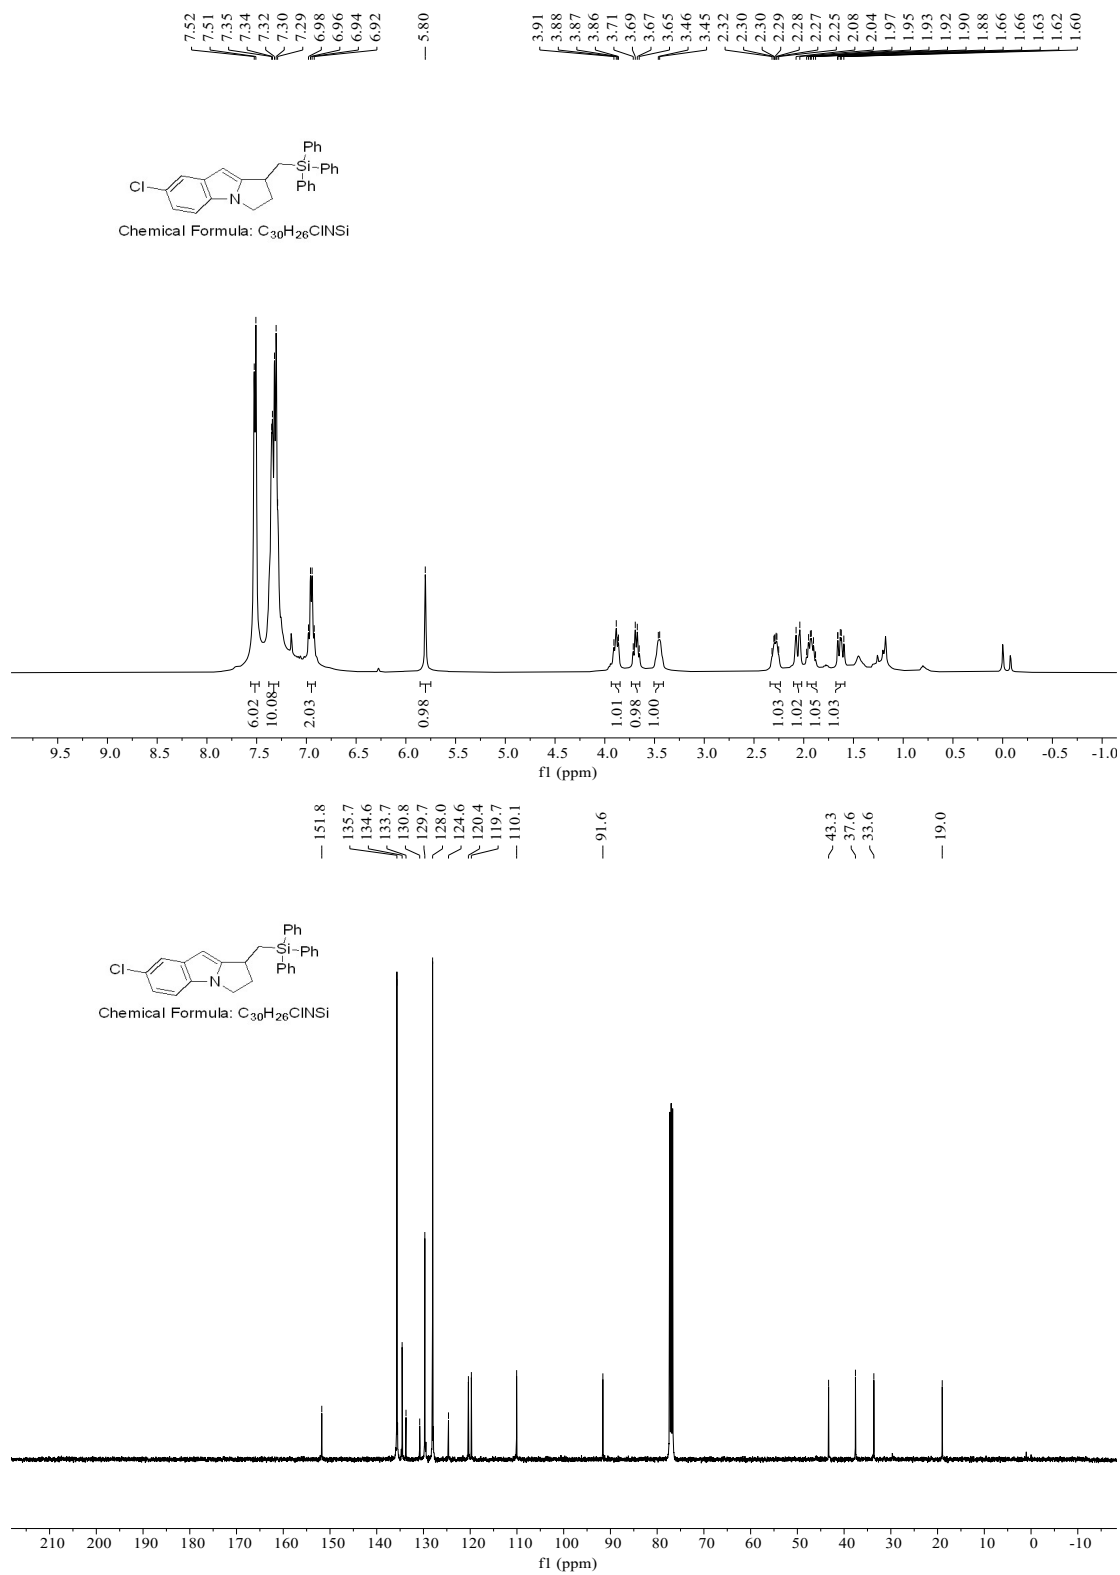

Fig. S33  $^1H$  NMR (400 MHz,  $CDCl_3$ ),  $^{13}C$  NMR (100 MHz,  $CDCl_3$ ) of **3bg**

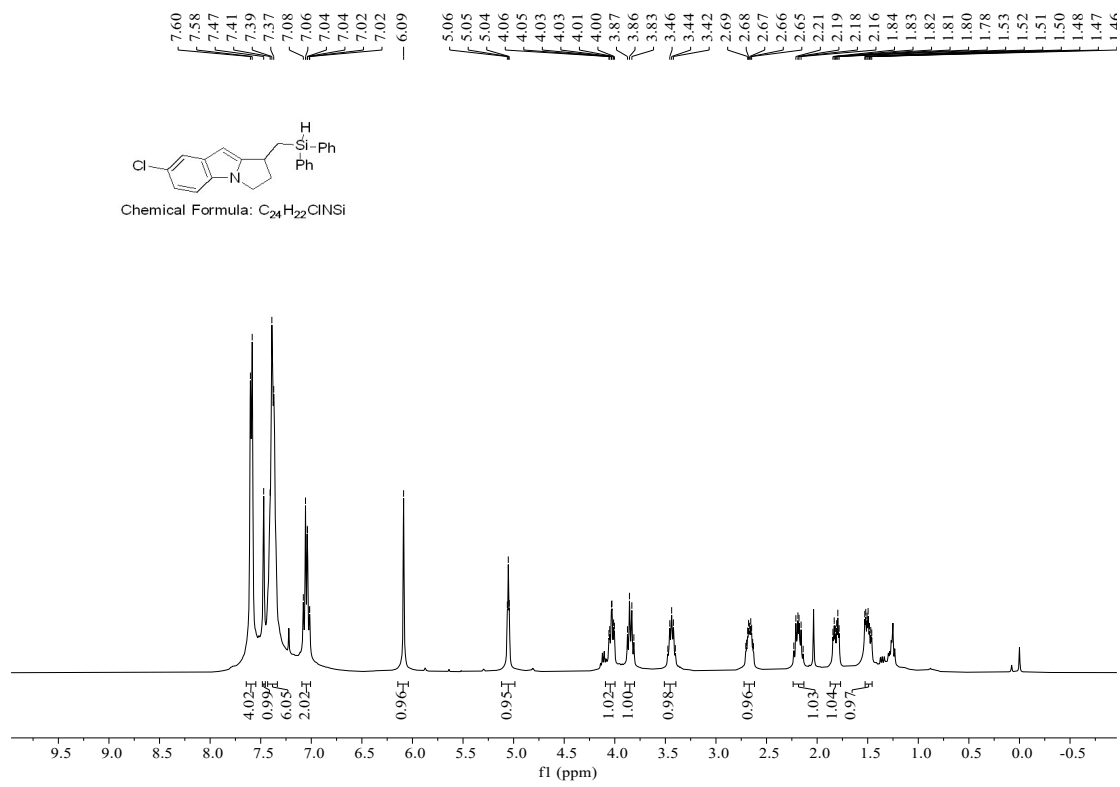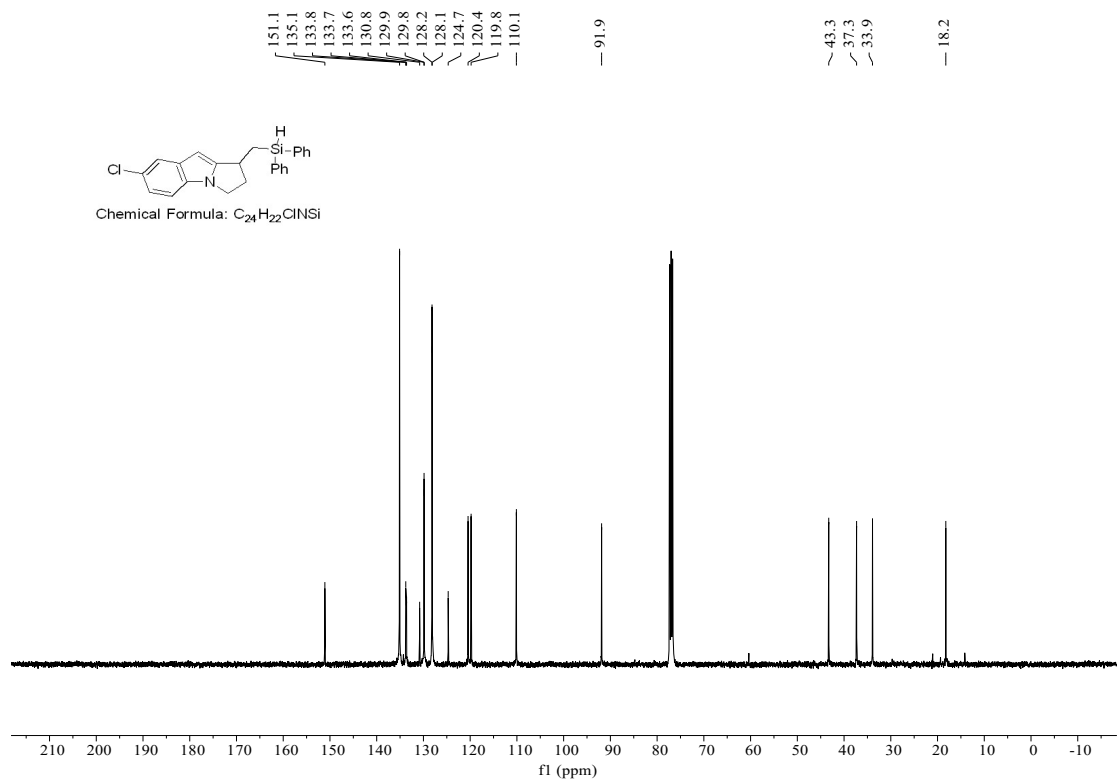

Fig. S34  $^1H$  NMR (400 MHz,  $CDCl_3$ ),  $^{13}C$  NMR (100 MHz,  $CDCl_3$ ) of **3bh**

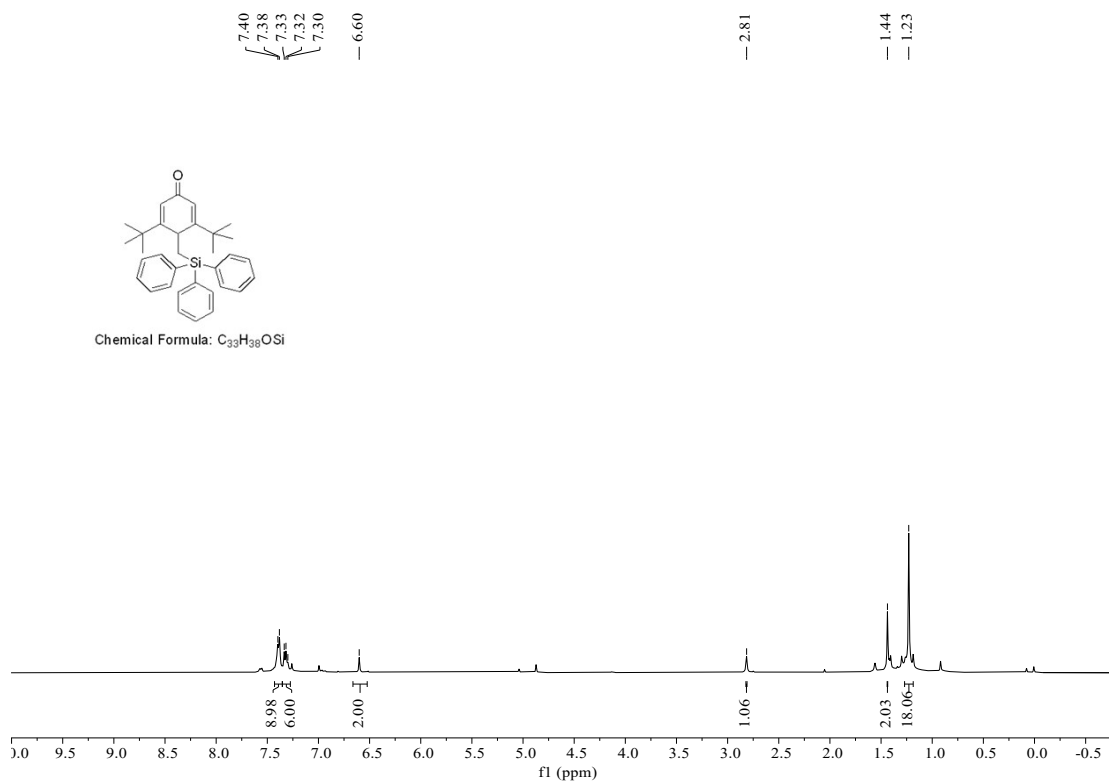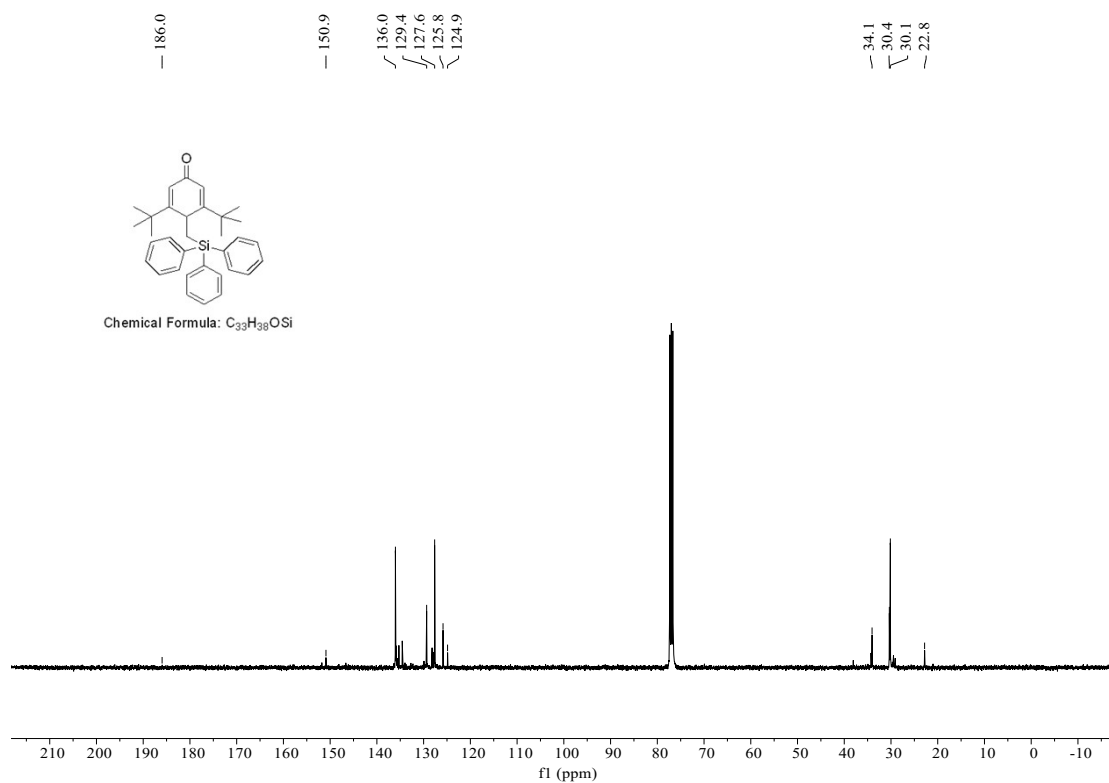

Fig. S35  $^1\text{H}$  NMR (400 MHz,  $\text{CDCl}_3$ ),  $^{13}\text{C}$  NMR (100 MHz,  $\text{CDCl}_3$ ) of **5**

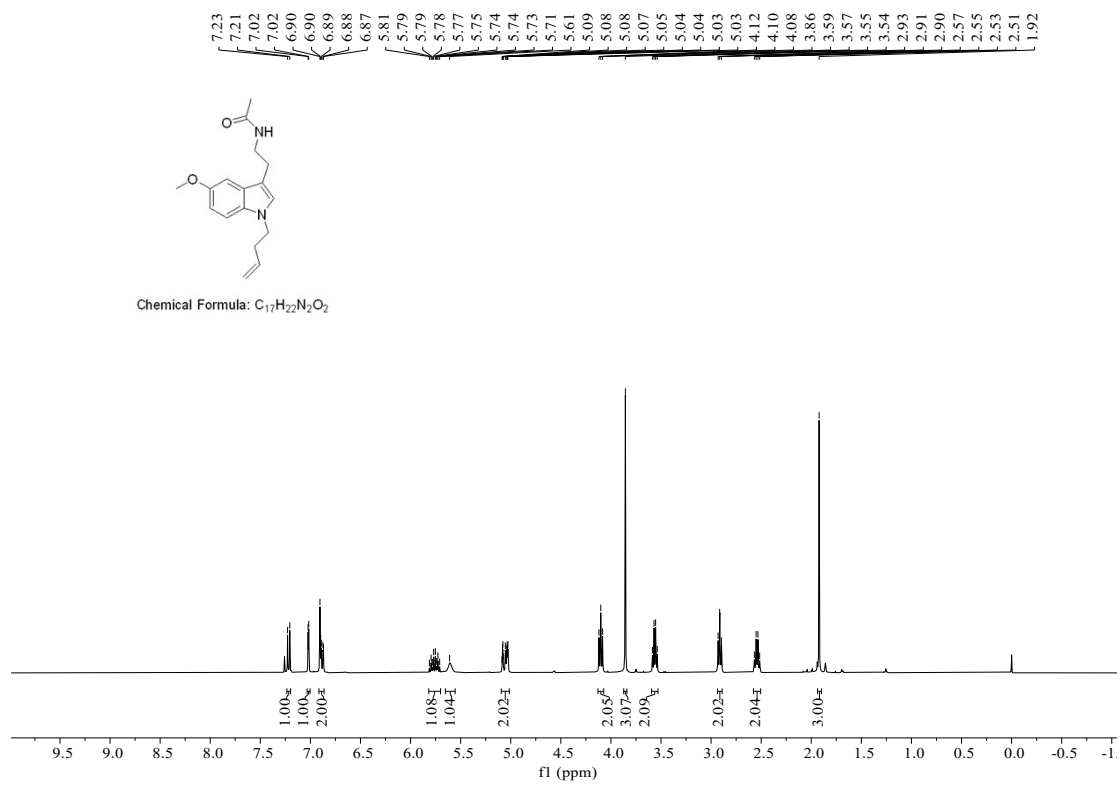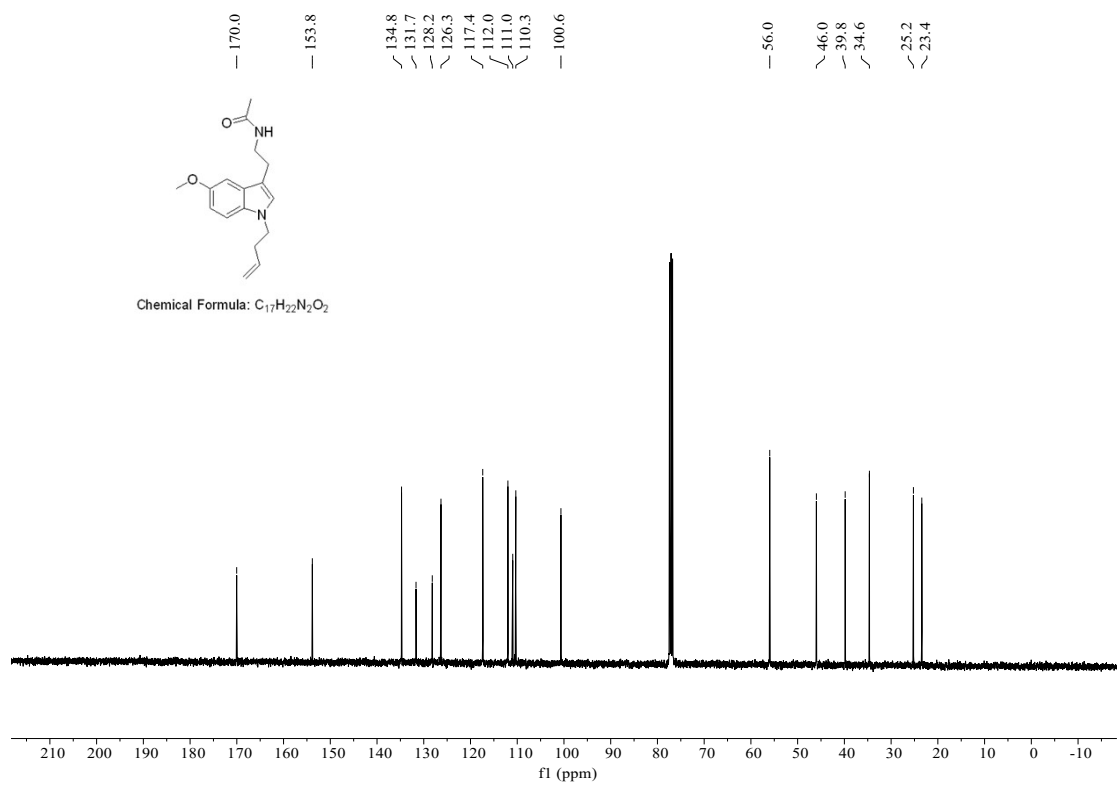

Fig. S36  $^1H$  NMR (400 MHz,  $CDCl_3$ ),  $^{13}C$  NMR (100 MHz,  $CDCl_3$ ) of **1z**
